# Supplementary material for: Pd-catalysed β-selective C(sp3)–H arylation of simple amides
Source: Royal Society of Chemistry journal article supplement (doi:10.1039/d1cc02261j), 2021-01-01

## **Pd-Catalysed $\beta$ -Selective C(sp<sup>3</sup>)-H Arylation of Simple Amides**

Hong-Yan Hao,<sup>#</sup> Shao-Jie Lou,<sup>#</sup> Shuang Wang, Kun Zhou, Qiu-Zi Wu, Yang-Jie Mao,<sup>\*</sup> Zhen-Yuan Xu,  
and Dan-Qian Xu<sup>\*</sup>

Catalytic Hydrogenation Research Center, State Key Laboratory Breeding Base of Green Chemistry-  
Synthesis Technology, Key Laboratory of Green Pesticides and Cleaner Production Technology of  
Zhejiang Province, Zhejiang University of Technology, Hangzhou 310014, P. R. China

### **Table of Contents**

|             |                                                               |     |
|-------------|---------------------------------------------------------------|-----|
| <b>1.</b>   | General                                                       | S2  |
| <b>2.</b>   | Experimental section                                          | S2  |
| <b>2.1.</b> | Preparation of substrates                                     | S2  |
| <b>2.2.</b> | Optimization of reaction conditions                           | S3  |
| <b>2.3.</b> | General conditions for the arylation substrate scope research | S4  |
| <b>2.4.</b> | Synthetic applications                                        | S5  |
| <b>2.5.</b> | Mechanistic studies                                           | S6  |
| <b>3.</b>   | Characterization of products                                  | S8  |
| <b>4.</b>   | References                                                    | S21 |
| <b>5.</b>   | NMR Spectra                                                   | S23 |

## 1. General

Unless otherwise stated, all experiments were carried out under air atmosphere. The reagents and solvents were purchased from commercial suppliers and used without further purification unless noted.  $^1\text{H}$  NMR and  $^{13}\text{C}$  NMR spectra were obtained on a Bruker AVANCE III 500 instrument in  $\text{CDCl}_3$  using TMS as an internal standard, operating at 500 MHz and 126 MHz, respectively. Chemical shifts ( $\delta$ ) are expressed in ppm and coupling constants  $J$  are given in Hz. For  $\text{CDCl}_3$  or  $\text{DMSO}-d_6$  solutions the chemical shifts are reported as parts per million (ppm) to residual protium or carbon of the solvents;  $\text{CHCl}_3$   $\delta\text{H}$  (7.26 ppm) and  $\text{CDCl}_3$   $\delta\text{C}$  (77.03 ppm);  $\text{DMSO}$   $\delta\text{H}$  (2.51 ppm) and  $\text{DMSO}-d_6$   $\delta\text{C}$  (39.52 ppm).  $^{19}\text{F}$  NMR were recorded on a Bruker AVANCE III or Ascend400. Multiplicities are reported using the following abbreviations: s = singlet, d = doublet, t = triplet, q = quartet, dd = doublet of doublets, td = triplet of doublets, ddd = doublet of doublet of doublets, m = multiplet, br = broad resonance. GC experiments were carried out using Agilent 7890B GC. GC-MS experiments that used dodecane as an internal standard were performed with a Thermo DSQ II, Trace GC Ultra. High resolution mass spectra (HRMS (ESI-TOF)) were obtained on an Agilent 6545 Q-TOF LC-MS spectrometer equipped with an ESI source.

## 2. Experimental section

### 2.1. Preparation of substrates

#### A. The substrates **1** were prepared following the literature procedure<sup>1,2</sup>

To a stirring solution of isobutyryl chloride (5 mmol) in DCM (20 mL) was added the corresponding amine  $\text{R}_1\text{R}_2\text{NH}$  or  $\text{R}_1\text{R}_2\text{NH}\cdot\text{HCl}$  (5.5 mmol) and aqueous solution of  $\text{K}_2\text{CO}_3$  (10 mL, 1M) dropwise at 0 °C. The reaction mixture was allowed to warm to room temperature and stirred for 6 h. Upon completion, the resulting mixture was separated, and the aqueous layer was extracted with DCM (3 × 20 mL). The combined organic layers was washed with brine, dried over anhydrous  $\text{MgSO}_4$ , filtered, and concentrated in *vacuo*. The crude residue was purified by flash chromatography to afford substrate **1**.

This method also can be used for the synthesis of corresponding substrates **1**.

### 2.2. Optimization of reaction conditions

**Table S1.** Screening of temperatures and catalysts<sup>a</sup>

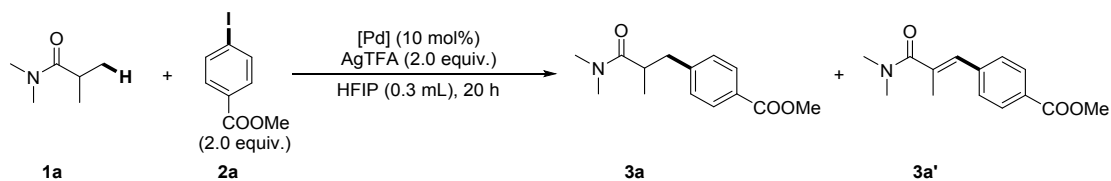

| <sup>a</sup> Entry | [T/°C]     | [Pd]                                                   | Yield of <b>3a/3a'</b> (%) <sup>b</sup> |
|--------------------|------------|--------------------------------------------------------|-----------------------------------------|
| 1                  | 80         | Pd(OAc) <sub>2</sub>                                   | 44                                      |
| 2                  | 50         | Pd(OAc) <sub>2</sub>                                   | 11                                      |
| 3                  | 110        | Pd(OAc) <sub>2</sub>                                   | 55/7                                    |
| 4 <sup>c</sup>     | 110        | Pd(OAc) <sub>2</sub>                                   | 57/7                                    |
| <b>5</b>           | <b>120</b> | <b>Pd(OAc)<sub>2</sub></b>                             | <b>65/8</b>                             |
| 6                  | 130        | Pd(OAc) <sub>2</sub>                                   | 54                                      |
| 7                  | 140        | Pd(OAc) <sub>2</sub>                                   | 52                                      |
| 8                  | 120        | PdCl <sub>2</sub>                                      | 53/7                                    |
| 9                  | 120        | Pd(TFA) <sub>2</sub>                                   | 44/6                                    |
| 10                 | 120        | Pd(dba) <sub>2</sub>                                   | 23                                      |
| 11                 | 120        | Pd(PPh <sub>3</sub> ) <sub>4</sub>                     | 40/7                                    |
| 12                 | 120        | [Pd(Cl)(C <sub>3</sub> H <sub>5</sub> ) <sub>2</sub> ] | 30/13                                   |
| 13                 | 120        | Pd(dppf)Cl <sub>2</sub>                                | 7                                       |
| 14                 | 120        | PdCl <sub>2</sub> (CH <sub>3</sub> CN) <sub>2</sub>    | 7/10                                    |
| 15                 | 120        | PdCl <sub>2</sub> (cod)                                | 26/13                                   |

<sup>a</sup>Reaction conditions: **1a** (0.1 mmol), methyl 4-iodobenzoate (2.0 equiv.), [Pd] (10 mol%), AgTFA (2.0 equiv.), HFIP (0.3 mL) were added to a test tube, the mixture was stirred at indicated temperature for 20 h. <sup>b</sup>GC-MS analysis using dodecane as an internal standard. <sup>c</sup>Reaction for 48 h.

**Table S2.** Screening of solvents and Ag salts<sup>a</sup>

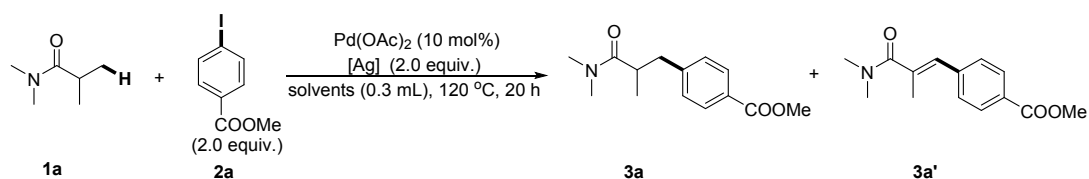

| <sup>a</sup> Entry | [Ag]                                 | Solvents                        | Yield of <b>3a/3a'</b> (%) <sup>b</sup> |
|--------------------|--------------------------------------|---------------------------------|-----------------------------------------|
| <b>1</b>           | <b>AgTFA</b>                         | <b>HFIP</b>                     | <b>65/8</b>                             |
| 2                  | AgTFA                                | toluene                         | trace                                   |
| 3                  | AgTFA                                | DMF                             | trace                                   |
| 4                  | AgTFA                                | DCE                             | 32                                      |
| 5                  | AgTFA                                | 1,4-dioxane                     | trace                                   |
| 6                  | AgTFA                                | CH <sub>3</sub> NO <sub>2</sub> | 30                                      |
| 7                  | AgTFA                                | CH <sub>3</sub> CN              | n.r                                     |
| 8                  | AgTFA                                | TAA                             | 25                                      |
| 9                  | AgNO <sub>3</sub>                    | HFIP                            | 52/10                                   |
| 10                 | AgNO <sub>2</sub>                    | HFIP                            | 43/3                                    |
| 11                 | Ag(CF <sub>3</sub> SO <sub>3</sub> ) | HFIP                            | 47/2                                    |
| 12                 | Ag <sub>3</sub> PO <sub>4</sub>      | HFIP                            | 8                                       |
| 13                 | Ag <sub>2</sub> CO <sub>3</sub>      | HFIP                            | 5                                       |
| 14                 | Ag <sub>2</sub> SO <sub>4</sub>      | HFIP                            | 15                                      |
| 15                 | AgBF <sub>4</sub>                    | HFIP                            | 54/2                                    |
| 16                 | AgSbF <sub>6</sub>                   | HFIP                            | 60/10                                   |
| 17 <sup>c</sup>    | AgSbF <sub>6</sub>                   | HFIP                            | 63/19                                   |
| 18                 | AgOAc                                | HFIP                            | 9                                       |

<sup>a</sup>Reaction condition: **1a** (0.1 mmol), methyl 4-iodobenzoate (2.0 equiv.), Pd(OAc)<sub>2</sub> (10 mol%), Ag salts (2.0 equiv.), solvents (0.3 mL), the mixture was stirred at 120 °C for 20 h. <sup>b</sup>GC-MS analysis using dodecane as an internal standard. <sup>c</sup>Reaction for 48 h.

### 2.3. General conditions for the arylation substrate scope research

**Conditions A:** In a 10 mL test tube equipped with a stir bar, amide **1** (0.2 mmol), Pd(OAc)<sub>2</sub> (4.5 mg, 0.02 mmol, 10 mol%), AgTFA (88.4 mg, 0.4 mmol, 2.0 equiv.), aryl iodide (0.4 mmol, 2.0 equiv.) and HFIP (0.6 mL) were added successively. Then the tube was sealed and heated at 120 °C for 20 h under stirring. Upon completion, the residue was purified by silica gel chromatography to afford the desired products **3**.

**Conditions B:** In a 10 mL test tube equipped with a stir bar, amide **1** (0.2 mmol), Pd(OAc)<sub>2</sub> (4.5 mg, 0.02 mmol, 10 mol%), AgSbF<sub>6</sub> (137.5 mg, 0.4 mmol, 2.0 equiv.), aryl iodide (0.4 mmol, 2.0 equiv.) and HFIP (0.6 mL) were added successively. Then the tube was sealed and heated at 120 °C for 20 h under stirring. Upon completion, the residue was purified by silica gel chromatography to afford the desired products **3**.

**3k-3p** were prepared according to the procedure under **conditions B**. **3s** was prepared at 80 °C.

## 2.4. Synthetic applications

### A. Gram-scale reaction

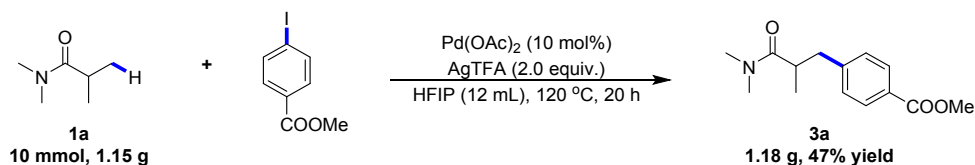

In a 100 mL test tube equipped with a stir bar, **1a** (10.0 mmol), Pd(OAc)<sub>2</sub> (224.5 mg, 1.0 mmol, 10 mol%), AgTFA (4.4 g, 20.0 mmol, 2.0 equiv.), methyl 4-iodobenzoate (5.2 g, 20.0 mmol, 2.0 equiv.), and HFIP (12 mL) were added successively. Then the tube was sealed and heated at 120 °C for 20 h under stirring. Upon completion, the residue was purified by silica gel chromatography to afford the desired product **3a**.

### B. Reduction of arylation products

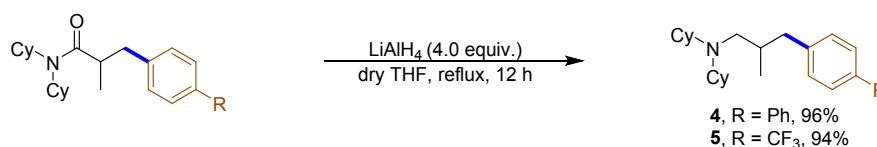

The reduction procedure was conducted according to the literature<sup>3</sup>. To a Schlenk tube (10 mL) was added corresponding amide (0.1 mmol), LiAlH<sub>4</sub> (15.2 mg, 0.4 mmol), and dry THF (2.0 mL). The tube was sealed with a Teflon-lined screw cap, refrigerated with liquid nitrogen, evacuated the air and filled with nitrogen by the Schlenk line for 3 times. Then the tube was refluxed for 12 h under stirring. Next, the tube was allowed to cool to room temperature. The solvent was then removed in *vacuo* and the residue was purified through flash column chromatography on silica gel (petroleum ether/EtOAc/MeOH = 1:1:0.1) to give the corresponding products.

### C. Direct synthesis of fungicide fenpropidin and fenpropimorph

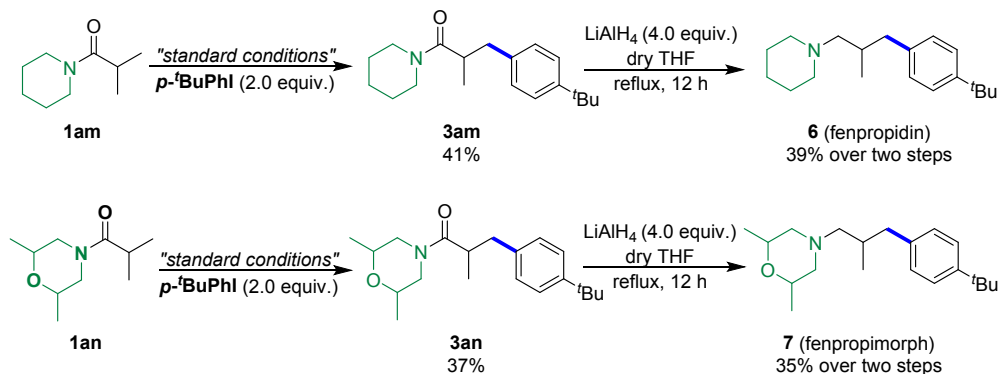

The products **6** and **7** were prepared by the same process described above.

## 2.5. Mechanistic studies

### A. Attempted reaction with olefin **1a'**

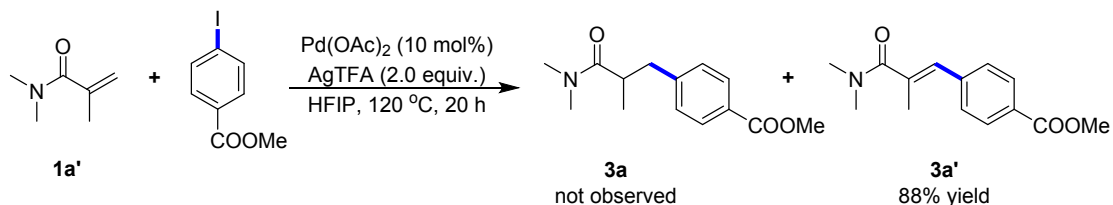

In a 10 mL test tube equipped with a stir bar, amide **1a'** (0.2 mmol), Pd(OAc)<sub>2</sub> (4.5 mg, 0.02 mmol, 10 mol%), AgTFA (88.4 mg, 0.4 mmol, 2.0 equiv.), methyl 4-iodobenzoate (104.8 mg, 0.4 mmol, 2.0 equiv.) and HFIP (0.6 mL) were added successively. Then the tube was sealed and heated at 120 °C for 20 h under stirring. Upon completion, the residue was purified by silica gel chromatography to afford the products **3a'**.

### B. Control experiment without aryl iodide

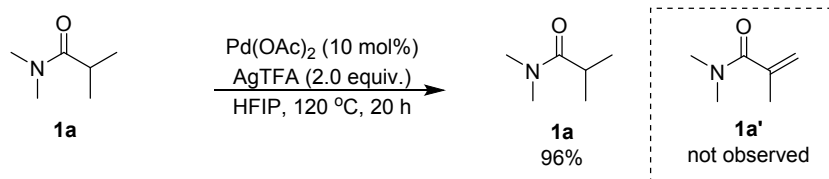

In a 10 mL test tube equipped with a stir bar, amide **1a** (0.1 mmol), Pd(OAc)<sub>2</sub> (2.25 mg, 0.01 mmol, 10 mol%), AgTFA (44.2 mg, 0.2 mmol, 2.0 equiv.), and HFIP (0.3 mL) were added successively. Then the tube was sealed and heated at 120 °C for 20 h under stirring. Upon completion, the residue was diluted with EtOAc, washed with water, and the organic layer was filtered and subject to the GC-MS analysis.

The GC-MS spectrum showed no formation of the β-H elimination product N,N-Dimethylmethacrylamide (**1a'**), indicated that the aryl iodides might play a significant role in the desaturation process.<sup>4</sup>

### C. Deuterium-labeling experiment

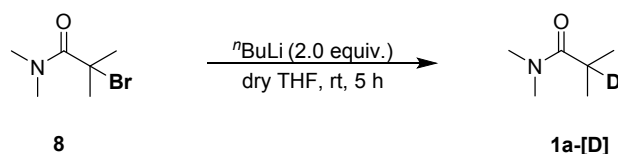

To a dried and degassed Schlenk round bottom flask was charged with **8** (970 mg, 5.0 mmol, 1.0 equiv.) and anhydrous THF (15 mL). After cooling down the resulting mixture to -78 °C, <sup>n</sup>BuLi (10 mmol, 2.0 equiv.) was added dropwise, and the mixture was allowed to warm to room temperature and stirred for 5.0 h. The reaction was quenched by dropwise addition of D<sub>2</sub>O (4.0 equiv.) at -78 °C. After warmed to room temperature, the reaction was stirred for another 3 h. The resulting mixture was extracted with

Et<sub>2</sub>O (3 × 30 mL), dried with Na<sub>2</sub>SO<sub>4</sub>, and evaporated in *vacuo*. Upon completion, the residue was purified by silica gel chromatography to afford the desired product **1a-[D]**.

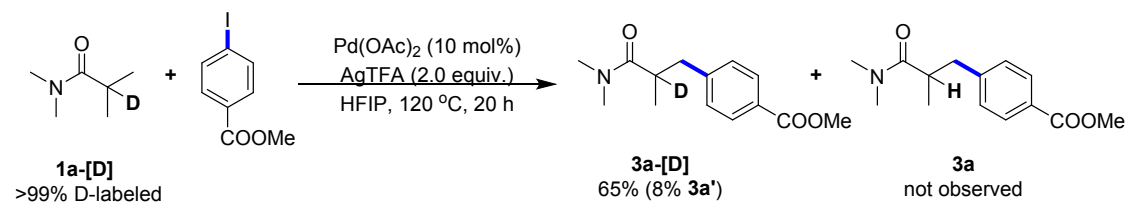

In a 10 mL test tube equipped with a stir bar, amide **1a-[D]** (0.2 mmol), Pd(OAc)<sub>2</sub> (4.5 mg, 0.02 mmol, 10 mol%), AgTFA (88.4 mg, 0.4 mmol, 2.0 equiv.), methyl 4-iodobenzoate (104.8 mg, 0.4 mmol, 2.0 equiv.) and HFIP (0.6 mL) were added successively. Then the tube was sealed and heated at 120 °C for 20 h under stirring. Upon completion, the residue was purified by silica gel chromatography to afford the desired product **3a-[D]**.

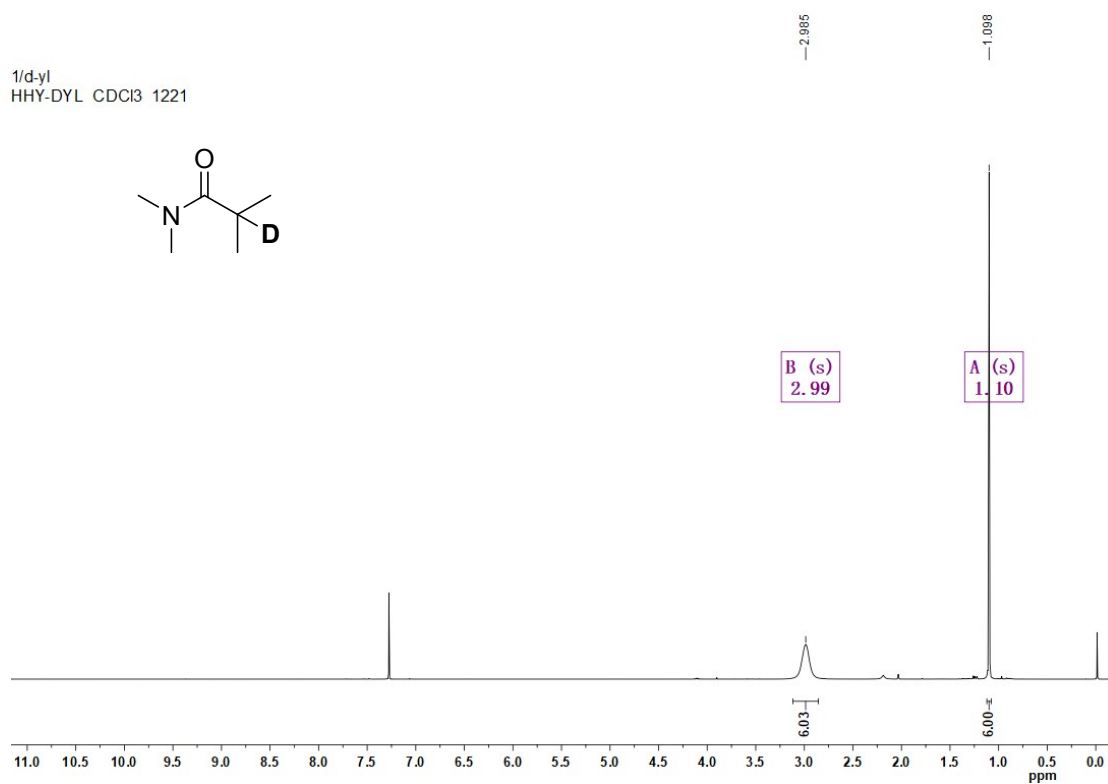

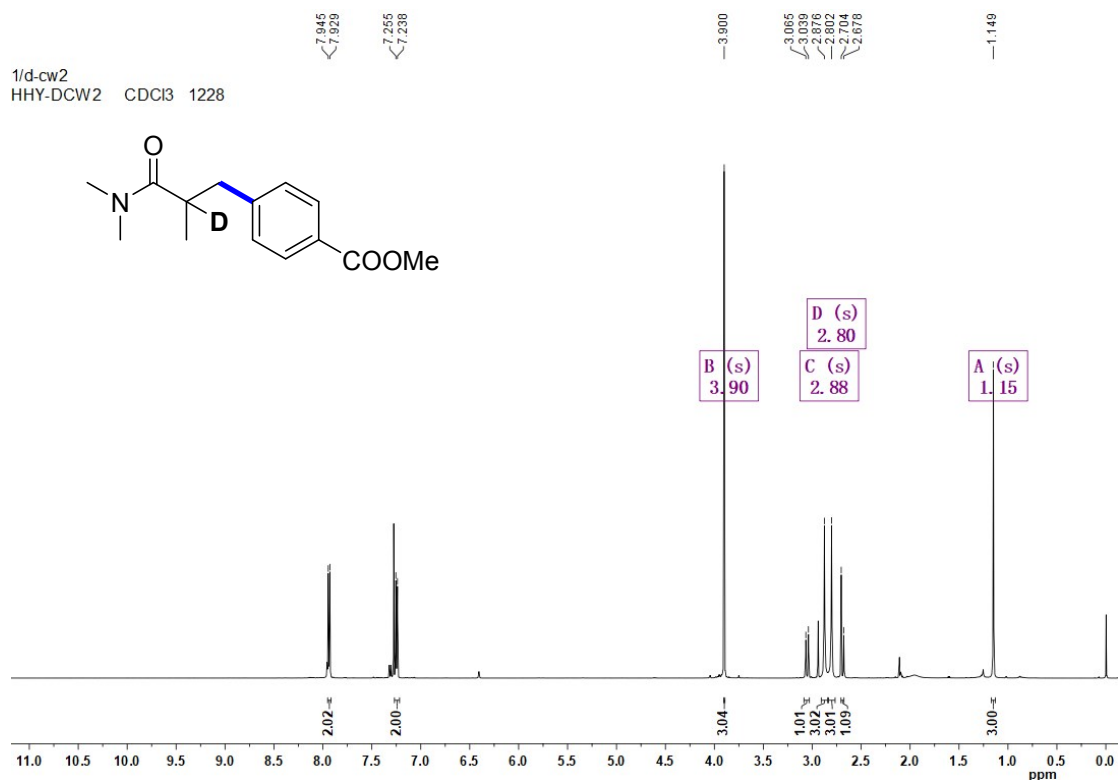

### 3. Characterization of products

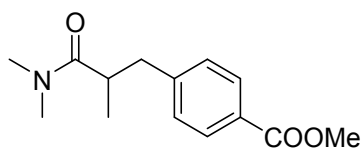

**Methyl 4-(3-(dimethylamino)-2-methyl-3-oxopropyl)benzoate (3a):** Colorless oil (60%, mono-diarylation = 13:1, 29.9 mg);  $R_f = 0.30$  (petroleum ether-EtOAc = 1:1);  $^1\text{H NMR}$  (500 MHz,  $\text{CDCl}_3$ ):  $\delta = 7.95$  (d,  $J = 8.3$  Hz, 2H), 7.26 (d,  $J = 8.3$  Hz, 2H), 3.91 (s, 3H), 3.12-2.98 (m, 2H), 2.89 (s, 3H), 2.82 (s, 3H), 2.75-2.68 (m, 1H), 1.17 (d,  $J = 6.6$  Hz, 3H) ppm;  $^{13}\text{C NMR}$  (126 MHz,  $\text{CDCl}_3$ ):  $\delta = 175.4$ , 167.1, 145.8, 129.6 (2C), 129.0 (2C), 128.2, 52.0, 40.4, 37.7, 37.1, 35.7, 17.7 ppm; HRMS (ESI-TOF): calcd.  $\text{C}_{14}\text{H}_{19}\text{NO}_3\text{Na}$   $[\text{M}+\text{Na}]^+$  272.1257, found: 272.1264.

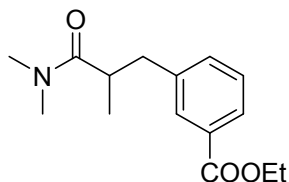

**Ethyl 3-(3-(dimethylamino)-2-methyl-3-oxopropyl)benzoate (3b):** Colorless oil (42%, mono-diarylation = 32:1, 22.1 mg);  $R_f = 0.30$  (petroleum ether-EtOAc = 1:1);  $^1\text{H NMR}$  (500 MHz,  $\text{CDCl}_3$ ):  $\delta = 7.91$ -7.86 (m, 2H), 7.39-7.32 (m, 2H), 4.38 (q,  $J = 7.1$  Hz, 2H), 3.11-2.98 (m, 2H), 2.89 (s, 3H), 2.84 (s, 3H), 2.73-2.69 (m, 1H), 1.40 (t,  $J = 7.1$  Hz, 3H), 1.15 (d,  $J = 6.5$  Hz, 3H) ppm;  $^{13}\text{C NMR}$  (126 MHz,  $\text{CDCl}_3$ ):  $\delta = 175.5$ , 166.7, 140.5, 133.7, 130.5, 129.8, 128.3, 127.4, 60.9, 40.1, 37.7, 37.1, 35.6, 17.5, 14.3 ppm; HRMS (ESI-TOF): calcd.  $\text{C}_{15}\text{H}_{21}\text{NO}_3\text{Na}$   $[\text{M}+\text{Na}]^+$  286.1414; found: 286.1428.



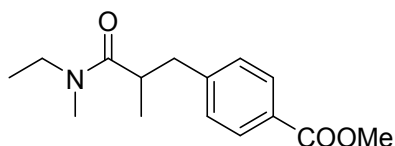

**Methyl 4-(3-(ethyl(methyl)amino)-2-methyl-3-oxopropyl)benzoate (3c) (1.0:0.97 mixture of rotamers):** Colorless oil (43%, mono-:di-arylation = 32:1, 22.6 mg);  $R_f = 0.30$  (petroleum ether-EtOAc = 1:1); major:  $^1\text{H NMR}$  (500 MHz,  $\text{CDCl}_3$ , mixture of rotamers):  $\delta = 7.96\text{-}7.93$  (m, 2H), 7.27-7.24 (m, 2H), 3.91 (s, 3H), 3.49-3.22 (m, 1H), 3.19-2.91 (m, 3H), 2.86 (s, 3H), 2.74-2.66 (m, 1H), 1.19-1.01 (m, 3H), 0.95 (t,  $J = 7.2$  Hz, 3H) ppm; major:  $^{13}\text{C NMR}$  (126 MHz,  $\text{CDCl}_3$ , mixture of rotamers):  $\delta = 175.1$ , 167.1, 145.9, 129.6 (2C), 129.1 (2C), 128.2, 52.0, 42.6, 40.4, 37.8, 33.1, 17.7, 12.2 ppm; minor:  $^1\text{H NMR}$  (500 MHz,  $\text{CDCl}_3$ , mixture of rotamers):  $\delta = 7.96\text{-}7.93$  (m, 2H), 7.27-7.24 (m, 2H), 3.91 (s, 3H), 3.49-3.22 (m, 1H), 3.19-2.91 (m, 3H), 2.77 (s, 3H), 2.74-2.66 (m, 1H), 1.18 (dd,  $J_1 = 10.5$  Hz,  $J_2 = 6.7$  Hz, 3H), 1.00 (t,  $J = 7.1$  Hz, 3H) ppm; minor:  $^{13}\text{C NMR}$  (126 MHz,  $\text{CDCl}_3$ , mixture of rotamers):  $\delta = 174.8$ , 167.1, 145.9, 129.6 (2C), 129.1 (2C), 128.2, 52.0, 44.2, 40.6, 37.8, 34.6, 18.4, 13.9 ppm; HRMS (ESI-TOF): calcd.  $\text{C}_{15}\text{H}_{21}\text{NO}_3\text{Na}$   $[\text{M}+\text{Na}]^+$  286.1414 found: 286.1420.

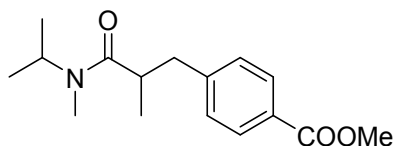

**Methyl 4-(3-(isopropyl(methyl)amino)-2-methyl-3-oxopropyl)benzoate (3d) (1.0:0.77 mixture of rotamers):** Colorless oil (52%, mono-:di-arylation = 32:1, 28.8 mg);  $R_f = 0.30$  (petroleum ether-EtOAc = 1:1); major:  $^1\text{H NMR}$  (500 MHz,  $\text{CDCl}_3$ ):  $\delta = 7.94$  (dd,  $J_1 = 8.3$  Hz,  $J_2 = 1.9$  Hz, 2H), 7.26 (dt,  $J_1 = 8.2$  Hz,  $J_2 = 4.1$  Hz, 2H), 4.06-3.91 (m, 4H), 3.13-2.92 (m, 2H), 2.73-2.59 (m, 4H), 1.17 (dd,  $J_1 = 8.8$  Hz,  $J_2 = 6.6$  Hz, 3H), 1.03 (d,  $J = 6.8$  Hz, 3H), 0.93 (d,  $J = 6.8$  Hz, 3H) ppm;  $^{13}\text{C NMR}$  (126 MHz,  $\text{CDCl}_3$ ):  $\delta = 174.8$ , 167.1, 145.9, 129.6 (2C), 129.1 (2C), 128.1, 52.0, 43.8, 40.5, 38.3, 28.0, 20.4, 19.4, 17.8 ppm; minor:  $^1\text{H NMR}$  (500 MHz,  $\text{CDCl}_3$ ):  $\delta = 7.94$  (dd,  $J_1 = 8.3$  Hz,  $J_2 = 1.9$  Hz, 2H), 7.26 (dt,  $J_1 = 8.2$  Hz,  $J_2 = 4.1$  Hz, 2H), 4.06-3.91 (m, 4H), 3.13-2.92 (m, 2H), 2.73-2.59 (m, 4H), 1.17 (dd,  $J_1 = 8.8$  Hz,  $J_2 = 6.6$  Hz, 3H), 1.13 (d,  $J = 6.6$  Hz, 3H), 0.83 (d,  $J = 6.6$  Hz, 3H) ppm;  $^{13}\text{C NMR}$  (126 MHz,  $\text{CDCl}_3$ ):  $\delta = 174.8$ , 167.1, 146.0, 129.6 (2C), 129.1 (2C), 128.1, 52.0, 47.6, 40.7, 37.8, 26.0, 20.7, 19.3, 18.5 ppm; HRMS (ESI-TOF): calcd.  $\text{C}_{16}\text{H}_{23}\text{NO}_3\text{Na}$   $[\text{M}+\text{Na}]^+$  300.1570, found: 300.1577.

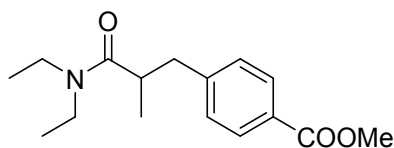

**Methyl 4-(3-(diethylamino)-2-methyl-3-oxopropyl)benzoate (3e):** Colorless oil (46%, mono-:di-arylation = 32:1, 25.5 mg);  $R_f = 0.30$  (petroleum ether-EtOAc = 1:1);  $^1\text{H NMR}$  (500 MHz,  $\text{CDCl}_3$ ):  $\delta = 7.94$  (d,  $J = 8.0$  Hz, 2H), 7.27 (d,  $J = 9.5$  Hz, 2H), 3.91 (s, 3H), 3.42-3.35 (m, 1H), 3.26-3.19 (m, 1H), 3.13-3.05 (m, 3H), 2.92-2.85 (m, 1H), 2.70 (dd,  $J_1 = 5.5$  Hz,  $J_2 = 13$  Hz, 1H), 1.20 (d,  $J = 6.5$  Hz, 3H), 1.03 (t,  $J = 7.0$  Hz, 3H), 0.96 (t,  $J = 7.0$  Hz, 3H) ppm;  $^{13}\text{C NMR}$  (126 MHz,  $\text{CDCl}_3$ ):  $\delta = 174.6$ , 167.1, 145.9, 129.6 (2C), 129.2 (2C), 128.1, 52.0, 41.8, 40.7 (d,  $J = 22.2$  Hz, 2C), 38.0, 18.5, 14.7, 13.0 ppm; HRMS (ESI-TOF): calcd.  $\text{C}_{16}\text{H}_{23}\text{NO}_3\text{Na}$   $[\text{M}+\text{Na}]^+$  300.1570, found: 300.1577.

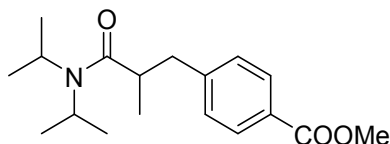

**Methyl 4-(3-(diisopropylamino)-2-methyl-3-oxopropyl)benzoate (3f):** Solid (60%, mono-diarylation = 19:1, 36.6 mg);  $R_f = 0.58$  (petroleum ether-EtOAc = 3:1);  $^1\text{H NMR}$  (500 MHz,  $\text{CDCl}_3$ ):  $\delta = 7.91$  (d,  $J = 7.9$  Hz, 2H), 7.25 (d,  $J = 7.9$  Hz, 2H), 3.88-3.82 (m, 5H), 3.11 (dd,  $J_1 = 13.1$  Hz,  $J_2 = 8.8$  Hz, 1H), 2.93-2.86 (m, 1H), 2.64 (dd,  $J_1 = 13.1$  Hz,  $J_2 = 5.6$  Hz, 1H), 1.31 (d,  $J = 6.7$  Hz, 3H), 1.22 (d,  $J = 6.8$  Hz, 3H), 1.14 (d,  $J = 6.8$  Hz, 3H), 1.08 (d,  $J = 6.7$  Hz, 3H), 0.85 (s, 3H) ppm;  $^{13}\text{C NMR}$  (126 MHz,  $\text{CDCl}_3$ ):  $\delta = 174.3, 167.1, 146.1, 129.5$  (2C), 129.2 (2C), 127.9, 51.9, 447.8, 45.7, 40.6, 39.0, 21.3, 21.0, 20.7, 20.5, 18.5 ppm; HRMS (ESI-TOF): calcd.  $\text{C}_{18}\text{H}_{27}\text{NO}_3\text{Na}$   $[\text{M}+\text{Na}]^+$  328.1883, found: 328.1891.

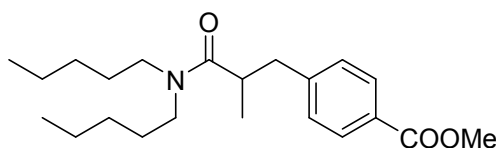

**Methyl 4-(3-(dipentylamino)-2-methyl-3-oxopropyl)benzoate (3g) (1.0:0.46 mixture of rotamers):** Solid (70%, 50.6 mg);  $R_f = 0.58$  (petroleum ether-EtOAc = 3:1); major:  $^1\text{H NMR}$  (500 MHz,  $\text{CDCl}_3$ ):  $\delta = 7.93$ -7.92 (m, 2H), 7.28-7.24 (m, 2H), 3.90 (s, 3H), 3.29-3.01 (m, 6H), 2.68 (dd,  $J_1 = 5.5$  Hz,  $J_2 = 13$  Hz, 1H), 1.43-1.11 (m, 13H), 0.91-0.83 (m, 7H), 0.76-0.70 (m, 1H) ppm;  $^{13}\text{C NMR}$  (126 MHz,  $\text{CDCl}_3$ , mixture of rotamers):  $\delta = 174.9, 167.1, 145.9, 129.6$  (2C), 129.1 (2C), 128.1, 51.9, 47.8, 46.4, 40.7, 38.0, 29.2, 29.1, 28.9, 27.4, 22.4, 22.3, 18.6, 14.0, 13.9 ppm; minor:  $^1\text{H NMR}$  (500 MHz,  $\text{CDCl}_3$ ):  $\delta = 7.94$ -7.92 (m, 2H), 7.28-7.24 (m, 2H), 3.90 (s, 3H), 3.29-3.01 (m, 6H), 2.68 (dd,  $J_1 = 5.5$  Hz,  $J_2 = 13$  Hz, 1H), 1.43-1.11 (m, 13H), 0.91-0.83 (m, 7H), 0.76-0.70 (m, 1H) ppm;  $^{13}\text{C NMR}$  (126 MHz,  $\text{CDCl}_3$ ):  $\delta = 175.4, 167.1, 145.9, 129.6$  (2C), 129.2 (2C), 128.1, 51.7, 47.6, 46.2, 40.6, 38.0, 29.2, 29.1, 28.9, 27.4, 22.4, 22.3, 16.7, 11.4, 11.3 ppm; HRMS (ESI-TOF): calcd.  $\text{C}_{22}\text{H}_{35}\text{NO}_3\text{Na}$   $[\text{M}+\text{Na}]^+$  384.2509, found: 384.2518.

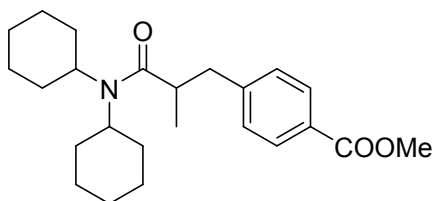

**Methyl 4-(3-(dicyclohexylamino)-2-methyl-3-oxopropyl)benzoate (3h):** Colorless oil (79%, mono-diarylation = 24:1, 60.8 mg);  $R_f = 0.37$  (petroleum ether-EtOAc = 7:1);  $^1\text{H NMR}$  (500 MHz,  $\text{CDCl}_3$ ):  $\delta = 7.94$  (d,  $J = 8.3$  Hz, 2H), 7.26 (d,  $J = 8.3$  Hz, 2H), 3.90 (s, 3H), 3.35 (s, 1H), 3.13-3.05 (m, 1H), 2.98-2.88 (m, 1H), 2.66 (dd,  $J_1 = 13.1$  Hz,  $J_2 = 5.5$  Hz, 1H), 2.59-2.42 (m, 1H), 1.82-0.97 (m, 23H) ppm;  $^{13}\text{C NMR}$  (126 MHz,  $\text{CDCl}_3$ )  $\delta = 174.4, 167.1, 146.1, 129.5$  (2C), 129.2 (2C), 128.0, 57.8, 56.1, 51.9, 40.8, 38.8, 31.7, 31.3, 30.2, 30.0, 26.6 (2C), 26.1 (2C), 25.4, 25.2, 18.7 ppm; HRMS (ESI-TOF): calcd.  $\text{C}_{24}\text{H}_{35}\text{NO}_3\text{Na}$   $[\text{M}+\text{Na}]^+$  408.2509, found: 408.2517.

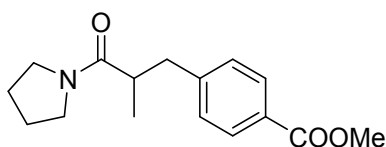

**Methyl 4-(2-methyl-3-oxo-3-(pyrrolidin-1-yl)propyl)benzoate (3i) (1.0:0.37 mixture of rotamers):** Solid (49%, 27.0 mg);  $R_f = 0.30$  (petroleum ether-EtOAc = 1:1); major:  $^1\text{H NMR}$  (500 MHz,  $\text{CDCl}_3$ ):  $\delta = 7.94$  (d,  $J = 8.2$  Hz, 2H), 7.26 (d,  $J = 8.2$  Hz, 2H), 3.91 (s, 3H), 3.50-3.27 (m, 3H), 3.06 (dd,  $J_1 = 13.0$  Hz,  $J_2 = 8.6$  Hz, 1H), 2.98 (dt,  $J_1 = 9.9$  Hz,  $J_2 = 7.1$  Hz, 1H), 2.88-2.76 (m, 1H), 2.72-2.62 (m, 1H), 1.88-1.63 (m, 4H), 1.18 (d,  $J = 6.7$  Hz, 3H) ppm;  $^{13}\text{C NMR}$  (126 MHz,  $\text{CDCl}_3$ ):  $\delta = 174.0$ , 166.9, 145.4, 129.7 (2C), 129.1 (2C), 128.4, 66.9, 66.5, 52.1, 46.0, 42.1, 40.5, 37.1, 18.1 ppm; minor:  $^1\text{H NMR}$  (500 MHz,  $\text{CDCl}_3$ ):  $\delta = 7.94$  (d,  $J = 8.2$  Hz, 2H), 7.26 (d,  $J = 8.2$  Hz, 2H), 3.91 (s, 3H), 3.50-3.27 (m, 3H), 3.06 (dd,  $J_1 = 13.0$  Hz,  $J_2 = 8.6$  Hz, 1H), 2.98 (dt,  $J_1 = 9.9$  Hz,  $J_2 = 7.1$  Hz, 1H), 2.88-2.76 (m, 1H), 2.72-2.62 (m, 1H), 1.88-1.63 (m, 4H), 1.13 (d,  $J = 6.8$  Hz, 3H) ppm;  $^{13}\text{C NMR}$  (126 MHz,  $\text{CDCl}_3$ ):  $\delta = 173.9$ , 166.6, 145.5, 129.8 (2C), 129.2 (2C), 128.4, 66.9, 66.5, 52.1, 45.6, 42.1, 37.5, 35.3, 17.2 ppm; HRMS (ESI-TOF): calcd.  $\text{C}_{16}\text{H}_{21}\text{NO}_3\text{Na}$   $[\text{M}+\text{Na}]^+$  298.1414, found: 298.1424.

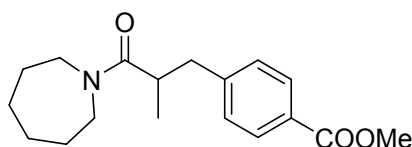

**Methyl 4-(3-(azepan-1-yl)-2-methyl-3-oxopropyl)benzoate (3j):** Colorless oil (54%, 32.7 mg);  $R_f = 0.49$  (petroleum ether-EtOAc = 1:1);  $^1\text{H NMR}$  (500 MHz,  $\text{CDCl}_3$ ):  $\delta = 7.93$  (d,  $J = 8.0$  Hz, 2H), 7.26 (d,  $J = 8.0$  Hz, 2H), 3.90 (s, 3H), 3.63-3.58 (m, 1H), 3.33-3.27 (m, 2H), 3.22-3.16 (m, 1H), 3.14-3.10 (m, 1H), 2.97-2.90 (m, 1H), 2.67 (dd,  $J_1 = 5.5$  Hz,  $J_2 = 13$  Hz, 1H), 1.66-1.53 (m, 3H), 1.47-1.33 (m, 3H), 1.32-1.21 (m, 2H), 1.18 (d,  $J = 6.5$  Hz, 3H) ppm;  $^{13}\text{C NMR}$  (126 MHz,  $\text{CDCl}_3$ ):  $\delta = 174.9$ , 167.1, 146.0, 129.5 (2C), 129.2 (2C), 128.0, 52.0, 47.7, 46.2, 40.5, 38.1, 29.3, 27.6, 26.5, 26.4, 18.4 ppm; HRMS (ESI-TOF): calcd.  $\text{C}_{18}\text{H}_{25}\text{NO}_3\text{Na}$   $[\text{M}+\text{Na}]^+$  326.1727, found: 326.1735.

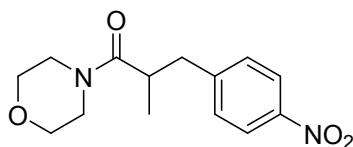

**2-Methyl-1-morpholino-3-(4-nitrophenyl)propan-1-one (3k):** Colorless oil (61%, 33.9 mg);  $R_f = 0.38$  (petroleum ether-EtOAc = 1:2);  $^1\text{H NMR}$  (500 MHz,  $\text{CDCl}_3$ ):  $\delta = 8.15$  (d,  $J = 8.7$  Hz, 2H), 7.36 (d,  $J = 8.7$  Hz, 2H), 3.68-3.50 (m, 5H), 3.46-3.23 (m, 3H), 3.18 (dd,  $J_1 = 13.3$  Hz,  $J_2 = 8.5$  Hz, 1H), 3.04-2.94 (m, 1H), 2.79 (dd,  $J_1 = 13.4$  Hz,  $J_2 = 6.0$  Hz, 1H), 1.21 (d,  $J = 6.8$  Hz, 3H) ppm;  $^{13}\text{C NMR}$  (126 MHz,  $\text{CDCl}_3$ ):  $\delta = 173.5$ , 147.9, 146.7, 129.9 (2C), 123.6 (2C), 66.9, 66.6, 46.0, 42.2, 39.9, 37.2, 18.1 ppm; HRMS (ESI-TOF): calcd.  $\text{C}_{14}\text{H}_{18}\text{N}_2\text{O}_4\text{Na}$   $[\text{M}+\text{Na}]^+$  301.1159; found: 301.1162.

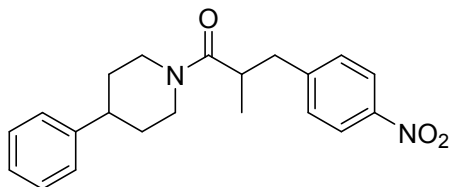

**2-Methyl-3-(4-nitrophenyl)-1-(4-phenylpiperidin-1-yl)propan-1-one (3l) (1.0:0.86 mixture of rotamers):** Colorless oil (40%, 28.2 mg);  $R_f = 0.46$  (petroleum ether-EtOAc = 1:1); major:  $^1\text{H NMR}$  (500 MHz,  $\text{CDCl}_3$ ):  $\delta = 8.17$  (dd,  $J_1 = 17.0$  Hz,  $J_2 = 8.2$  Hz, 2H), 7.40 (dd,  $J_1 = 29.2$  Hz,  $J_2 = 8.3$  Hz, 2H), 7.31 (dd,  $J_1 = 13.4$  Hz,  $J_2 = 5.6$  Hz, 2H), 7.25-7.16 (m, 2H), 6.96 (d,  $J = 7.5$  Hz, 1H), 4.77 (d,  $J = 11.7$  Hz, 1H), 3.92 (t,  $J = 13.8$  Hz, 1H), 3.21 (q,  $J = 10.0$  Hz, 1H), 3.07 (dd,  $J_1 = 22.2$  Hz,  $J_2 = 9.4$  Hz, 3H), 2.73-2.53 (m, 2H), 2.00-1.51 (m, 4H), 1.25 (d,  $J = 6.7$  Hz, 3H) ppm;  $^{13}\text{C NMR}$  (126 MHz,  $\text{CDCl}_3$ ):  $\delta = 173.1$ , 148.4, 146.6, 144.7, 130.1, 129.9, 128.6 (2C), 126.6, 126.5, 126.4, 123.6 (2C), 46.4, 42.9,

42.5, 40.4, 37.5, 33.9, 33.2, 18.3 ppm; minor:  $^1\text{H}$  NMR (500 MHz,  $\text{CDCl}_3$ ):  $\delta$  = 8.17 (dd,  $J_1$  = 17.0 Hz,  $J_2$  = 8.2 Hz, 2H), 7.40 (dd,  $J_1$  = 29.2 Hz,  $J_2$  = 8.3 Hz, 2H), 7.31 (dd,  $J_1$  = 13.4 Hz,  $J_2$  = 5.6 Hz, 2H), 7.25-7.16 (m, 2H), 6.96 (d,  $J$  = 7.5 Hz, 1H), 4.77 (d,  $J$  = 11.7 Hz, 1H), 3.92 (t,  $J$  = 13.8 Hz, 1H), 3.21 (q,  $J$  = 10.0 Hz, 1H), 2.94-2.76 (m, 3H), 2.73-2.53 (m, 2H), 2.00-1.51 (m, 4H), 1.25 (d,  $J$  = 6.7 Hz, 3H) ppm;  $^{13}\text{C}$  NMR (126 MHz,  $\text{CDCl}_3$ ):  $\delta$  = 173.2, 148.4, 146.6, 144.7, 130.1, 129.9, 128.6 (2C), 126.6, 126.5, 126.4, 123.6 (2C), 46.1, 42.7, 42.5, 40.0, 37.4, 34.2, 32.7, 18.3 ppm; HRMS (ESI-TOF): calcd.  $\text{C}_{21}\text{H}_{24}\text{N}_2\text{O}_3\text{Na}$   $[\text{M}+\text{Na}]^+$  375.1679; found: 375.1683.

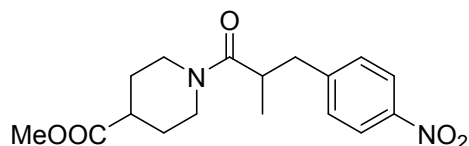

**Methyl 1-(2-methyl-3-(4-nitrophenyl)propanoyl)piperidine-4-carboxylate (3m) (1.0:0.85 mixture of rotamers):** Colorless oil (46%, 30.7 mg);  $R_f$  = 0.41 (petroleum ether-EtOAc = 2:1); major:  $^1\text{H}$  NMR (500 MHz,  $\text{CDCl}_3$ ):  $\delta$  = 8.14 (t,  $J$  = 8.1 Hz, 2H), 7.35 (t,  $J$  = 7.7 Hz, 2H), 4.39 (dd,  $J_1$  = 38.1 Hz,  $J_2$  = 13.5 Hz, 1H), 3.78-3.71 (m, 1H), 3.70 (s, 3H), 3.23-3.11 (m, 1H), 3.10-2.87 (m, 2H), 2.83-2.65 (m, 2H), 2.48 (qd,  $J_1$  = 11.0 Hz,  $J_2$  = 7.0 Hz, 1H), 1.93-1.73 (m, 2H), 1.69-1.53 (m, 1H), 1.40-1.30 (m, 1H), 1.19 (d,  $J$  = 6.8 Hz, 3H) ppm;  $^{13}\text{C}$  NMR (126 MHz,  $\text{CDCl}_3$ ):  $\delta$  = 174.2, 173.2, 148.1, 146.7, 129.9 (2C), 123.6 (2C), 51.9, 44.9, 41.4, 40.9, 40.2, 37.4, 28.6, 28.0, 18.3 ppm; minor:  $^1\text{H}$  NMR (500 MHz,  $\text{CDCl}_3$ ):  $\delta$  = 8.14 (t,  $J$  = 8.1 Hz, 2H), 7.35 (t,  $J$  = 7.7 Hz, 2H), 4.39 (dd,  $J_1$  = 38.1 Hz,  $J_2$  = 13.5 Hz, 1H), 3.78-3.71 (m, 1H), 3.65 (s, 3H), 3.23-3.11 (m, 1H), 3.10-2.87 (m, 2H), 2.83-2.65 (m, 2H), 2.48 (qd,  $J_1$  = 11.0 Hz,  $J_2$  = 7.0 Hz, 1H), 1.93-1.73 (m, 2H), 1.69-1.53 (m, 1H), 1.40-1.30 (m, 1H), 1.19 (d,  $J$  = 6.8 Hz, 3H) ppm;  $^{13}\text{C}$  NMR (126 MHz,  $\text{CDCl}_3$ ):  $\delta$  = 174.5, 173.2, 148.2, 146.6, 129.9 (2C), 123.5 (2C), 51.9, 44.6, 41.2, 40.7, 30.0, 37.4, 28.4, 27.9, 18.1 ppm; HRMS (ESI-TOF): calcd.  $\text{C}_{17}\text{H}_{22}\text{N}_2\text{O}_5\text{Na}$   $[\text{M}+\text{Na}]^+$  357.1421; found: 357.1427.

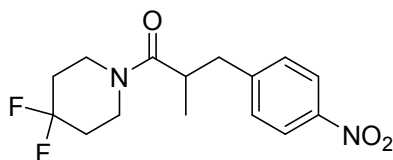

**1-(4,4-difluoropiperidin-1-yl)-2-methyl-3-(4-nitrophenyl)propan-1-one (3n):** Colorless oil (64%, 39.9 mg);  $R_f$  = 0.49 (petroleum ether-EtOAc = 1:1);  $^1\text{H}$  NMR (500 MHz,  $\text{CDCl}_3$ ):  $\delta$  = 8.15 (d,  $J$  = 8.7 Hz, 2H), 7.36 (d,  $J$  = 8.7 Hz, 2H), 3.70 (dt,  $J_1$  = 19.9 Hz,  $J_2$  = 6.0 Hz, 2H), 3.55-3.44 (m, 2H), 3.19 (dd,  $J_1$  = 13.3 Hz,  $J_2$  = 8.5 Hz, 1H), 3.08-2.98 (m, 1H), 2.79 (dd,  $J_1$  = 13.3 Hz,  $J_2$  = 5.9 Hz, 1H), 2.05-1.73 (m, 4H), 1.22 (d,  $J$  = 6.8 Hz, 3H) ppm;  $^{13}\text{C}$  NMR (126 MHz,  $\text{CDCl}_3$ ):  $\delta$  = 173.4, 147.9, 146.8, 129.9 (2C), 123.7 (2C), 101.0 (t,  $J$  = 248.1 Hz), 42.3 (t,  $J$  = 7.4 Hz), 39.9, 38.9 (t,  $J$  = 8.3 Hz), 37.6, 29.7 (2C), 18.2 ppm; HRMS (ESI-TOF): calcd.  $\text{C}_{15}\text{H}_{18}\text{F}_2\text{N}_2\text{O}_3\text{Na}$   $[\text{M}+\text{Na}]^+$  335.1178; found: 335.1181.

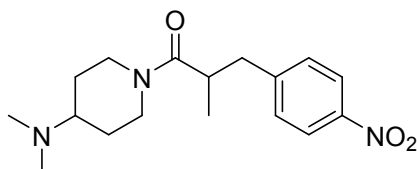

**1-(4-(dimethylamino)piperidin-1-yl)-2-methyl-3-(4-nitrophenyl)propan-1-one (3o) (1:0.86 mixture of rotamers):** Colorless oil (63%, 40.2 mg);  $R_f$  = 0.36 (EtOAc-MeOH = 1:1); major:  $^1\text{H}$  NMR (500 MHz,  $\text{CDCl}_3$ ):  $\delta$  = 8.14 (d,  $J$  = 6.4 Hz, 2H), 7.39 (d,  $J$  = 8.2 Hz, 2H), 4.73 (d,  $J$  = 13.7 Hz, 1H), 3.90 (d,  $J$  = 14.6 Hz, 1H), 3.40 (s, 1H), 3.22-2.96 (m, 3H), 2.90-2.74 (m, 2H), 2.53 (s, 3H), 2.41 (s, 3H),

2.17-1.86 (m, 3H), 1.53-1.48 (m, 1H), 1.20 (d,  $J = 6.8$  Hz, 3H).ppm;  $^{13}\text{C}$  NMR (126 MHz,  $\text{CDCl}_3$ ):  $\delta = 173.2, 146.7, 130.1, 123.5$  (4C), 62.4, 44.3, 40.4, 40.0, 37.5, 29.7 (2C), 27.9, 26.4, 18.1 ppm; minor:  $^1\text{H}$  NMR (500 MHz,  $\text{CDCl}_3$ ):  $\delta = 8.14$  (d,  $J = 6.4$  Hz, 2H), 7.34 (d,  $J = 8.1$  Hz, 2H), 4.73 (d,  $J = 13.7$  Hz, 1H), 3.90 (d,  $J = 14.6$  Hz, 1H), 3.40 (s, 1H), 3.22-2.96 (m, 3H), 2.90-2.74 (m, 2H), 2.53 (s, 3H), 2.41 (s, 3H), 2.17-1.86 (m, 3H), 1.53-1.48 (m, 1H), 1.20 (d,  $J = 6.8$  Hz, 3H). ppm;  $^{13}\text{C}$  NMR (126 MHz,  $\text{CDCl}_3$ ):  $\delta = 173.2, 146.7, 129.9, 123.5$  (4C), 62.6, 44.1, 40.5, 39.9, 37.4, 29.7 (2C), 28.5, 26.2, 18.2 ppm; HRMS (ESI-TOF): calcd.  $[\text{M}+\text{Na}]^+ \text{C}_{17}\text{H}_{25}\text{N}_3\text{O}_3\text{Na}$  342.1788; found: 342.1793.

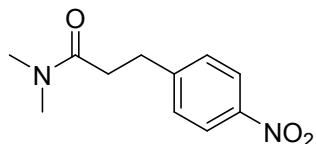

**N,N-dimethyl-3-(4-nitrophenyl)propanamide (3p):** Colorless oil (41%, 18.2 mg);  $R_f = 0.32$  (petroleum ether-EtOAc = 1:2);  $^1\text{H}$  NMR (500 MHz,  $\text{CDCl}_3$ ):  $\delta = 8.14$  (d,  $J = 8.7$  Hz, 2H), 7.40 (d,  $J = 8.8$  Hz, 2H), 3.09 (t,  $J = 7.5$  Hz, 2H), 2.96 (d,  $J = 9.8$  Hz, 6H), 2.66 (t,  $J = 7.5$  Hz, 2H) ppm;  $^{13}\text{C}$  NMR (126 MHz,  $\text{CDCl}_3$ ):  $\delta = 171.1, 149.5, 146.5, 129.3$  (2C), 123.6 (2C), 37.1, 35.5, 34.2, 30.9 ppm; HRMS (ESI-TOF): calcd.  $\text{C}_{11}\text{H}_{14}\text{N}_2\text{O}_3\text{Na}$   $[\text{M}+\text{Na}]^+$  245.0897; found: 245.0902.

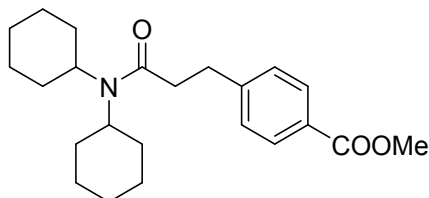

**Methyl 4-(3-(dicyclohexylamino)-2-methyl-3-oxopropyl)benzoate (3q):** Colorless oil (63%, 46.7 mg);  $R_f = 0.30$  (petroleum ether-EtOAc = 1:1);  $^1\text{H}$  NMR (500 MHz,  $\text{CDCl}_3$ ):  $\delta = 7.97$  (d,  $J = 8.3$  Hz, 2H), 7.30 (d,  $J = 8.2$  Hz, 2H), 3.91 (s, 3H), 3.39 (s, 1H), 3.06-2.97 (m, 2H), 2.64-2.43 (m, 3H), 1.78 (s, 4H), 1.59 (d,  $J = 10.7$  Hz, 4H), 1.46 (d,  $J = 10.7$  Hz, 4H), 1.29-1.04 (m, 8H) ppm;  $^{13}\text{C}$  NMR (126 MHz,  $\text{CDCl}_3$ ):  $\delta = 170.5, 167.1, 147.4, 129.8$  (2C), 128.6 (2C), 128.0, 57.8, 56.0, 52.0, 36.5, 31.7, 31.4 (2C), 30.2 (2C), 26.7 (2C), 26.0 (2C), 25.4, 25.2 ppm; HRMS (ESI-TOF): calcd.  $\text{C}_{23}\text{H}_{33}\text{NO}_3\text{Na}$   $[\text{M}+\text{Na}]^+$  394.2353, found: 394.2354.

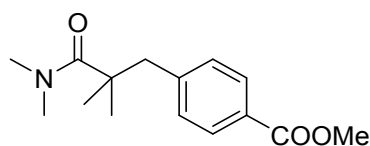

**Methyl 4-(3-(dimethylamino)-2,2-dimethyl-3-oxopropyl)benzoate (3r):** Colorless oil (87%, mono:di-arylation = 10:1, 45.7 mg);  $R_f = 0.32$  (petroleum ether-EtOAc = 1:1);  $^1\text{H}$  NMR (500 MHz,  $\text{CDCl}_3$ ):  $\delta = 7.94$  (d,  $J = 8.3$  Hz, 2H), 7.20 (d,  $J = 8.3$  Hz, 2H), 3.91 (s, 3H), 3.05 (s, 6H), 1.68 (s, 2H), 1.29 (s, 6H) ppm;  $^{13}\text{C}$  NMR (126 MHz,  $\text{CDCl}_3$ ):  $\delta = 176.1, 167.1, 143.9, 130.2$  (2C), 129.3 (2C), 128.4, 52.0, 46.2, 43.6, 38.6 (2C), 26.5 (2C). HRMS (ESI-TOF): calcd.  $\text{C}_{15}\text{H}_{21}\text{NO}_3\text{Na}$   $[\text{M}+\text{Na}]^+$  286.1414, found: 286.1425.

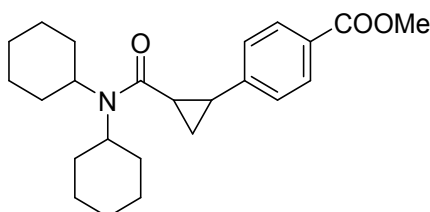

**Methyl 4-(2-(dicyclohexylcarbamoyl)cyclopropyl)benzoate (3s):** Solid (73%, 55.9 mg);  $R_f = 0.45$  (petroleum ether-EtOAc = 3:1);  $^1\text{H NMR}$  (500 MHz,  $\text{CDCl}_3$ ):  $\delta = 7.89$  (d,  $J = 7.0$  Hz, 2H),  $7.20$  (d,  $J = 8.5$  Hz, 2H),  $2.46$ - $2.41$  (m, 3H),  $2.24$ - $2.13$  (m, 1H),  $1.87$ - $1.80$  (m, 1H),  $1.74$ - $1.62$  (m, 8H),  $1.38$ - $1.25$  (m, 7H),  $1.20$ - $0.98$  (m, 6H),  $0.90$ - $0.86$  (m, 3H) ppm;  $^{13}\text{C NMR}$  (126 MHz,  $\text{CDCl}_3$ ):  $\delta = 173.0$ ,  $167.1$ ,  $166.9$ ,  $143.9$ ,  $129.2$  (2C),  $127.9$ ,  $127.2$ ,  $57.6$ ,  $55.9$ ,  $52.0$ ,  $31.6$ ,  $31.2$ ,  $29.8$ ,  $26.6$ ,  $26.5$ ,  $26.0$ ,  $25.9$ ,  $25.3$ ,  $25.2$ ,  $24.3$ ,  $22.6$ ,  $14.1$ ,  $11.7$  ppm; HRMS (ESI-TOF): calcd.  $\text{C}_{24}\text{H}_{33}\text{NO}_3\text{Na}$   $[\text{M}+\text{Na}]^+$  406.2353, found: 406.2359.

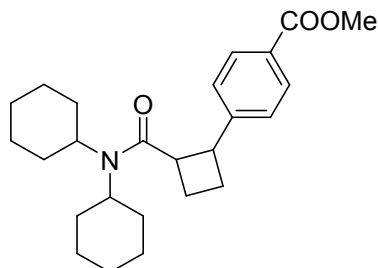

**Methyl 4-(2-(dicyclohexylcarbamoyl)cyclobutyl)benzoate (3t):** Solid (43%, 34.1 mg);  $R_f = 0.30$  (petroleum ether-EtOAc = 1:1);  $^1\text{H NMR}$  (500 MHz,  $\text{CDCl}_3$ ):  $\delta = 7.93$  (d,  $J = 8.3$  Hz, 2H),  $7.38$  (d,  $J = 8.4$  Hz, 2H),  $3.90$  (s, 4H),  $3.56$  (td,  $J_1 = 8.9$  Hz,  $J_2 = 5.2$  Hz, 1H),  $2.93$ - $2.82$  (m, 1H),  $2.78$ - $2.72$  (m, 1H),  $2.66$ - $2.44$  (m, 2H),  $2.42$ - $2.24$  (m, 3H),  $2.12$  (dq,  $J_1 = 11.6$  Hz,  $J_2 = 8.5$  Hz, 1H),  $1.76$ - $1.67$  (m, 3H),  $1.59$ - $1.45$  (m, 4H),  $1.37$ - $0.88$  (m, 11H) ppm;  $^{13}\text{C NMR}$  (126 MHz,  $\text{CDCl}_3$ ):  $\delta = 170.5$ ,  $167.1$ ,  $147.3$ ,  $129.4$  (2C),  $128.5$ ,  $128.4$  (2C),  $57.4$ ,  $55.9$ ,  $52.0$ ,  $44.1$ ,  $43.9$ ,  $31.3$ ,  $30.2$ ,  $30.0$ ,  $29.6$ ,  $27.1$ ,  $26.7$ ,  $26.6$ ,  $26.1$ ,  $25.9$ ,  $25.4$ ,  $25.2$ ,  $20.3$  ppm; HRMS (ESI-TOF): calcd.  $\text{C}_{25}\text{H}_{35}\text{NO}_3\text{Na}$   $[\text{M}+\text{Na}]^+$  420.2509; found: 420.2518.

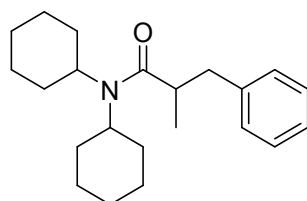

**N,N-dicyclohexyl-2-methyl-3-phenylpropanamide (3u):** Solid (47%, mono-:di-arylation = 10:1, 30.7 mg);  $R_f = 0.63$  (petroleum ether-EtOAc = 7:1);  $^1\text{H NMR}$  (500 MHz,  $\text{CDCl}_3$ ):  $\delta = 7.30$ - $7.22$  (m, 2H),  $7.19$  (d,  $J = 7.3$  Hz, 3H),  $3.36$  (s, 1H),  $3.06$ - $2.86$  (m, 2H),  $2.62$  (dd,  $J_1 = 12.9$  Hz,  $J_2 = 5.9$  Hz, 1H),  $2.51$  (s, 1H),  $1.83$ - $1.10$  (m, 23H) ppm;  $^{13}\text{C NMR}$  (126 MHz,  $\text{CDCl}_3$ ):  $\delta = 175.1$ ,  $140.5$ ,  $129.1$  (2C),  $128.2$  (2C),  $126.0$ ,  $57.5$ ,  $56.2$ ,  $41.0$ ,  $39.2$ ,  $31.8$ ,  $30.9$ ,  $30.2$ ,  $30.1$ ,  $26.7$  (2C),  $26.1$  (2C),  $25.5$ ,  $25.3$ ,  $18.5$ . HRMS (ESI-TOF): calcd.  $\text{C}_{22}\text{H}_{33}\text{NONa}$   $[\text{M}+\text{Na}]^+$  350.2454, found: 350.2459.

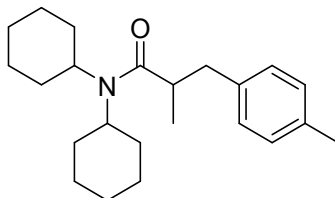

**N,N-dicyclohexyl-2-methyl-3-(p-tolyl)propanamide (3v):** Solid (51%, mono-:di-arylation = 24:1, 34.8 mg);  $R_f = 0.63$  (petroleum ether-EtOAc = 7:1);  $^1\text{H NMR}$  (500 MHz,  $\text{CDCl}_3$ ):  $\delta = 7.07$  (s, 4H),  $3.36$  (s, 1H),  $2.91$  (ddd,  $J_1 = 34.0$  Hz,  $J_2 = 13.4$  Hz,  $J_3 = 7.7$  Hz, 2H),  $2.63$ - $2.47$  (m, 2H),  $2.31$  (s, 3H),  $1.77$ - $1.00$  (m, 23H) ppm;  $^{13}\text{C NMR}$  (126 MHz,  $\text{CDCl}_3$ ):  $\delta = 175.0$ ,  $137.4$ ,  $135.4$ ,  $129.0$  (2C),  $128.9$  (2C),  $57.7$ ,  $56.2$ ,  $40.5$ ,  $39.1$ ,  $31.6$ ,  $31.0$ ,  $30.2$ ,  $30.1$ ,  $26.7$  (2C),  $26.1$  (2C),  $25.5$ ,  $25.3$ ,  $21.0$ ,  $18.4$  ppm; HRMS (ESI-TOF): calcd.  $\text{C}_{23}\text{H}_{35}\text{NONa}$   $[\text{M}+\text{Na}]^+$  364.2611, found: 364.2618.

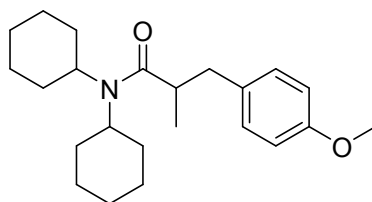

**N,N-dicyclohexyl-3-(4-methoxyphenyl)-2-methylpropanamide (3w):** Solid (52%, 37.1 mg);  $R_f = 0.60$  (petroleum ether-EtOAc = 7:1);  $^1\text{H NMR}$  (500 MHz,  $\text{CDCl}_3$ ):  $\delta = 7.11$  (d,  $J = 7.9$  Hz, 2H), 6.81 (d,  $J = 7.9$  Hz, 2H), 3.79-3.78 (m, 3H), 3.38 (s, 1H), 3.07-2.81 (m, 2H), 2.67-2.42 (m, 2H), 1.90-1.54 (m, 8H), 1.50-0.97 (m, 15H) ppm;  $^{13}\text{C NMR}$  (126 MHz,  $\text{CDCl}_3$ ):  $\delta = 175.0, 158.0, 132.7, 130.1$  (2C), 113.6 (2C), 57.8, 56.2, 55.3, 40.1, 39.0, 31.7, 31.1, 30.2, 30.1, 26.7 (2C), 26.2 (2C), 25.5, 25.3, 18.4 ppm; HRMS (ESI-TOF): calcd.  $\text{C}_{23}\text{H}_{35}\text{NO}_2\text{Na}$   $[\text{M}+\text{Na}]^+$  380.2560; found: 380.2567.

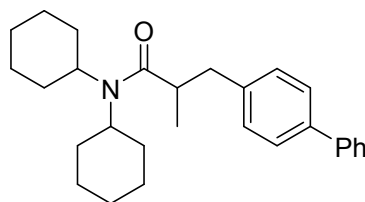

**3-([1,1'-Biphenyl]-4-yl)-N,N-dicyclohexyl-2-methylpropanamide (3x):** Solid (50%, 40.3 mg);  $R_f = 0.57$  (petroleum ether-EtOAc = 7:1);  $^1\text{H NMR}$  (500 MHz,  $\text{CDCl}_3$ ):  $\delta = 7.60$ -7.56 (m, 2H), 7.51 (d,  $J = 8.2$  Hz, 2H), 7.47-7.42 (m, 2H), 7.35 (tt,  $J_1 = 6.9$  Hz,  $J_2 = 1.2$  Hz, 1H), 7.28 (d,  $J = 8.1$  Hz, 2H), 3.37 (s, 1H), 3.12-2.93 (m, 2H), 2.73-2.50 (m, 2H), 1.84-1.57 (m, 8H), 1.48-1.05 (m, 15H) ppm;  $^{13}\text{C NMR}$  (126 MHz,  $\text{CDCl}_3$ ):  $\delta = 174.4, 141.1, 139.6, 139.1, 129.6$  (2C), 128.7 (2C), 127.0, 126.9 (4C), 57.6, 56.1, 40.7, 38.9, 31.7, 31.1, 30.2, 30.1, 26.7 (2C), 26.1 (2C), 25.5, 25.3, 18.7 ppm; HRMS (ESI-TOF): calcd.  $\text{C}_{28}\text{H}_{37}\text{NO}$  Na  $[\text{M}+\text{Na}]^+$  426.2767; found: 426.2780.

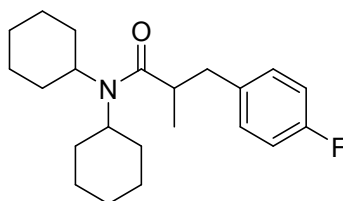

**N,N-dicyclohexyl-3-(4-fluorophenyl)-2-methylpropanamide (3y):** Solid (65%, 44.9 mg);  $R_f = 0.50$  (petroleum ether-EtOAc = 7:1);  $^1\text{H NMR}$  (500 MHz,  $\text{CDCl}_3$ ):  $\delta = 7.14$  (dd,  $J_1 = 8.4$  Hz,  $J_2 = 5.6$  Hz, 2H), 6.94 (t,  $J = 8.7$  Hz, 2H), 3.35 (s, 1H), 3.08-2.82 (m, 2H), 2.69-2.38 (m, 2H), 1.88-1.52 (m, 8H), 1.49-0.84 (m, 15H) ppm;  $^{13}\text{C NMR}$  (126 MHz,  $\text{CDCl}_3$ ):  $\delta = 174.9, 161.5$  (d,  $J = 243.4$  Hz), 136.3-136.2 (m), 130.6 (d,  $J = 7.7$  Hz, 2C), 114.8 (d,  $J = 21.2$  Hz, 2C), 57.8, 56.3, 40.1, 39.2, 31.7, 31.2, 30.3, 30.1, 26.7 (2C), 26.1 (2C), 25.5, 25.3, 18.6 ppm; HRMS (ESI-TOF): calcd.  $\text{C}_{22}\text{H}_{32}\text{FNONa}$   $[\text{M}+\text{Na}]^+$  368.2360, found: 368.2370.

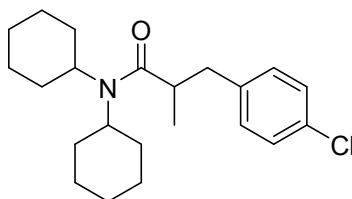

**3-(4-Chlorophenyl)-N,N-dicyclohexyl-2-methylpropanamide (3z):** Solid (76%, 54.9 mg);  $R_f = 0.45$  (petroleum ether-EtOAc = 7:1);  $^1\text{H NMR}$  (500 MHz,  $\text{CDCl}_3$ ):  $\delta = 7.23$  (d,  $J = 7.7$  Hz, 2H), 7.12 (d,  $J = 8.0$  Hz, 2H), 3.34 (s, 1H), 3.01 (dd,  $J_1 = 22.9$  Hz,  $J_2 = 15.2$  Hz, 3H), 2.63-2.41 (m, 2H), 1.96-0.76 (m,

22H) ppm;  $^{13}\text{C}$  NMR (126 MHz,  $\text{CDCl}_3$ ):  $\delta$  = 174.7, 139.0, 131.8, 130.5 (2C), 128.2 (2C), 57.7, 56.2, 40.2, 38.9, 31.6, 31.2, 30.2, 30.0, 26.6 (2C), 26.1 (2C), 25.5, 25.2, 18.6 ppm; HRMS (ESI-TOF): calcd.  $\text{C}_{22}\text{H}_{32}\text{ClNO}_2\text{Na}$   $[\text{M}+\text{Na}]^+$  384.2065, found: 384.2073.

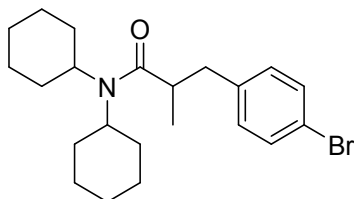

**3-(4-Bromophenyl)-N,N-dicyclohexyl-2-methylpropanamide (3aa):** Solid (76%, 61.6 mg);  $R_f$  = 0.50 (petroleum ether-EtOAc = 7:1);  $^1\text{H}$  NMR (500 MHz,  $\text{CDCl}_3$ ):  $\delta$  = 7.38 (d,  $J$  = 8.3 Hz, 2H), 7.06 (d,  $J$  = 8.2 Hz, 2H), 3.33 (s, 1H), 2.98 (dd,  $J_1$  = 13.1 Hz,  $J_2$  = 8.6 Hz, 1H), 2.93-2.82 (m, 1H), 2.56 (dd,  $J_1$  = 13.1 Hz,  $J_2$  = 5.5 Hz, 1H), 2.48 (s, 1H), 1.76 (q,  $J_1$  = 15.2 Hz,  $J_2$  = 13.6 Hz, 5H), 1.63-1.60 (m, 3H), 1.48-1.40 (m, 3H), 1.26-1.02 (m, 12H) ppm;  $^{13}\text{C}$  NMR (126 MHz,  $\text{CDCl}_3$ ):  $\delta$  = 175.0, 139.6, 131.2 (2C), 131.0 (2C), 119.9, 57.8, 56.2, 40.3, 39.0, 31.7, 31.6, 30.2, 30.1, 26.7 (2C), 26.1 (2C), 25.5, 25.3, 18.7 ppm; HRMS (ESI-TOF): calcd.  $\text{C}_{22}\text{H}_{32}\text{BrNO}_2\text{Na}$   $[\text{M}+\text{Na}]^+$  428.1559; found: 428.1551.

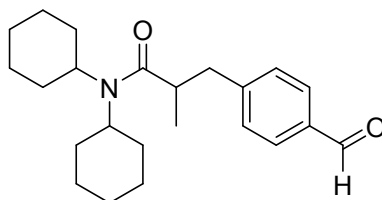

**N,N-dicyclohexyl-3-(4-formylphenyl)-2-methylpropanamide (3ab):** Solid (47%, 33.4 mg);  $R_f$  = 0.31 (petroleum ether-EtOAc = 7:1);  $^1\text{H}$  NMR (500 MHz,  $\text{CDCl}_3$ ):  $\delta$  = 9.97 (d,  $J$  = 1.9 Hz, 1H), 7.79 (dd,  $J_1$  = 8.1 Hz,  $J_2$  = 1.8 Hz, 2H), 7.36 (dd,  $J_1$  = 8.1 Hz,  $J_2$  = 1.6 Hz, 2H), 3.35 (s, 1H), 3.14 (dd,  $J_1$  = 13.0 Hz,  $J_2$  = 9.0 Hz, 1H), 2.94 (dt,  $J_1$  = 8.8 Hz,  $J_2$  = 6.3 Hz, 1H), 2.69 (dd,  $J_1$  = 13.1 Hz,  $J_2$  = 5.5 Hz, 1H), 2.47 (s, 1H), 1.75-1.40 (m, 10H), 1.27-0.99 (m, 13H) ppm;  $^{13}\text{C}$  NMR (126 MHz,  $\text{CDCl}_3$ ):  $\delta$  = 192.0, 169.7, 148.2, 134.7, 129.9 (2C), 129.8 (2C), 57.8, 56.4, 41.0, 38.8, 31.6, 31.2, 30.2, 30.0, 26.6 (2C), 26.1 (2C), 25.4, 25.2, 18.8 ppm; HRMS (ESI-TOF): calcd.  $\text{C}_{23}\text{H}_{33}\text{NO}_2\text{Na}$   $[\text{M}+\text{Na}]^+$  378.2404, found: 378.2415.

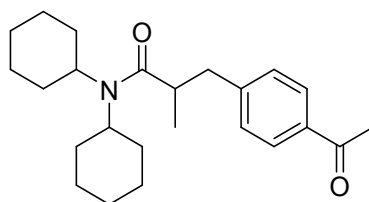

**3-(4-Acetylphenyl)-N,N-dicyclohexyl-2-methylpropanamide (3ac):** Solid (53%, 39.1 mg);  $R_f$  = 0.42 (petroleum ether-EtOAc = 3:1);  $^1\text{H}$  NMR (500 MHz,  $\text{CDCl}_3$ ):  $\delta$  = 7.83 (d,  $J$  = 8.1 Hz, 2H), 7.25 (d,  $J$  = 8.1 Hz, 2H), 3.31 (s, 1H), 3.08-3.04 (m, 1H), 2.90 (q,  $J_1$  = 7.2 Hz,  $J_2$  = 6.3 Hz, 1H), 2.65-2.61 (m, 1H), 2.54-2.44 (m, 4H), 1.71-0.98 (m, 23H) ppm;  $^{13}\text{C}$  NMR (126 MHz,  $\text{CDCl}_3$ ):  $\delta$  = 197.7, 174.2, 146.3, 135.1, 129.3 (2C), 128.2 (2C), 57.7, 56.1, 40.7, 38.6, 31.5, 31.0, 30.1, 29.9, 26.5, 26.4 (2C), 26.0 (2C), 25.3, 25.1, 18.6 ppm; HRMS (ESI-TOF): calcd.  $\text{C}_{24}\text{H}_{35}\text{NO}_2\text{Na}$   $[\text{M}+\text{Na}]^+$  392.2560; found: 392.2577.

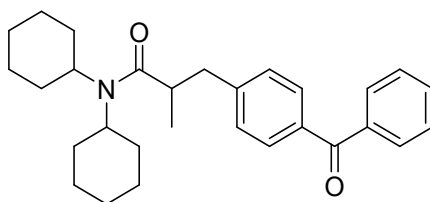



**3-(4-Benzoylphenyl)-N,N-dicyclohexyl-2-methylpropanamide (3ad):** Solid (42%, 36.2 mg);  $R_f = 0.57$  (petroleum ether-EtOAc = 3:1);  $^1\text{H NMR}$  (500 MHz,  $\text{CDCl}_3$ ):  $\delta = 7.80\text{-}7.74$  (m, 2H), 7.73 (d,  $J = 8.2$  Hz, 2H), 7.61-7.57 (m, 1H), 7.48 (t,  $J = 7.7$  Hz, 2H), 7.33-7.30 (m, 2H), 3.39 (s, 1H), 3.13 (dd,  $J_1 = 13.0$  Hz,  $J_2 = 8.8$  Hz, 1H), 3.02-2.91 (m, 1H), 2.70 (dd,  $J_1 = 13.0$  Hz,  $J_2 = 5.6$  Hz, 1H), 2.49 (s, 1H), 1.74 (s, 5H), 1.61 (t,  $J = 15.7$  Hz, 3H), 1.53-1.40 (m, 2H), 1.29-1.03 (m, 13H) ppm;  $^{13}\text{C NMR}$  (126 MHz,  $\text{CDCl}_3$ )  $\delta = 196.4, 174.5, 145.8, 137.9, 135.4, 132.2, 130.2$  (2C), 129.9 (2C), 129.1 (2C), 128.2 (2C), 57.9, 56.4, 40.8, 38.9, 31.6, 31.1, 30.2, 30.1, 26.6 (2C), 26.1 (2C), 25.4, 25.2, 18.8 ppm; HRMS (ESI-TOF)  $m/z$ : calcd. for  $\text{C}_{29}\text{H}_{37}\text{NO}_2\text{Na}$   $[\text{M}+\text{Na}]^+$  454.2717; found: 454.2738.

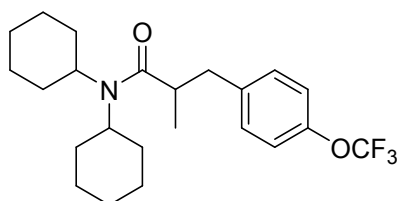

**N,N-dicyclohexyl-2-methyl-3-(4-(trifluoromethoxy)phenyl)propanamide (3ae):** Solid (70%, mono-:di-arylation = 6:1, 57.5 mg);  $R_f = 0.50$  (petroleum ether-EtOAc = 7:1);  $^1\text{H NMR}$  (500 MHz,  $\text{CDCl}_3$ ):  $\delta = 7.21$  (d,  $J = 8.3$  Hz, 2H), 7.10 (d,  $J = 8.1$  Hz, 2H), 3.31 (s, 1H), 3.09-2.99 (m, 1H), 2.90 (td,  $J_1 = 10.7$  Hz,  $J_2 = 8.8$  Hz,  $J_3 = 6.4$  Hz, 1H), 2.68-2.39 (m, 2H), 1.85-1.34 (m, 10H), 1.30-0.82 (m, 13H) ppm;  $^{13}\text{C NMR}$  (126 MHz,  $\text{CDCl}_3$ ):  $\delta = 174.5, 147.6, 139.4, 130.5$  (2C), 120.8 (2C), 120.5 (q,  $J = 257.2$  Hz), 57.8, 56.2, 40.3, 39.0, 31.7, 31.0, 30.2, 30.0, 26.6 (2C), 26.1 (2C), 25.5, 25.2, 18.8 ppm; HRMS (ESI-TOF): calcd.  $\text{C}_{23}\text{H}_{32}\text{F}_3\text{NO}_2\text{Na}$   $[\text{M}+\text{Na}]^+$  434.2277, found: 434.2296.

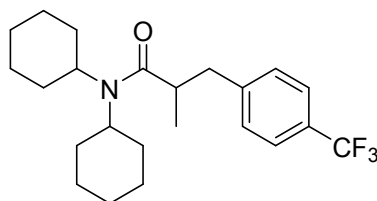

**N,N-dicyclohexyl-2-methyl-3-(4-(trifluoromethyl)phenyl)propanamide (3af):** Solid (73%, mono-:di-arylation = 7:1, 57.7 mg);  $R_f = 0.51$  (petroleum ether-EtOAc = 7:1);  $^1\text{H NMR}$  (500 MHz,  $\text{CDCl}_3$ ):  $\delta = 7.51$  (d,  $J = 7.9$  Hz, 2H), 7.30 (d,  $J = 7.9$  Hz, 2H), 3.29 (s, 1H), 3.09 (dd,  $J_1 = 13.1$  Hz,  $J_2 = 9.0$  Hz, 1H), 2.98-2.86 (m, 1H), 2.67 (dd,  $J_1 = 13.1$  Hz,  $J_2 = 5.5$  Hz, 1H), 2.47 (s, 1H), 1.91-1.59 (m, 8H), 1.46-0.91 (m, 15H) ppm;  $^{13}\text{C NMR}$  (126 MHz,  $\text{CDCl}_3$ ):  $\delta = 174.4, 144.8, 129.5$  (2C), 128.5 (q,  $J = 32.3$  Hz), 125.1 (q,  $J = 3.8$  Hz), 124.3 (q,  $J = 272.2$  Hz), 57.8, 56.3, 40.7, 38.9, 31.6, 31.1, 30.2, 30.0, 26.6, 26.1 (2C), 26.0 (2C), 25.4, 25.2, 18.8 ppm; HRMS (ESI-TOF): calcd.  $\text{C}_{23}\text{H}_{32}\text{F}_3\text{NONa}$   $[\text{M}+\text{Na}]^+$  418.2328, found: 418.2349.

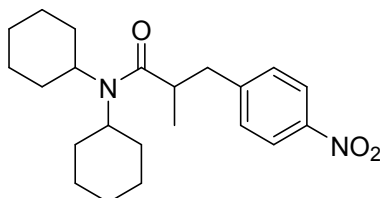

**N,N-dicyclohexyl-2-methyl-3-(4-nitrophenyl)propanamide (3ag):** Solid (63%, 46.9 mg);  $R_f = 0.30$  (petroleum ether-EtOAc = 1:1);  $^1\text{H NMR}$  (500 MHz,  $\text{CDCl}_3$ ):  $\delta = 8.07\text{-}7.96$  (m, 2H), 7.34 (d,  $J = 8.2$  Hz, 2H), 3.35 (s, 1H), 3.14 (dd,  $J_1 = 13.4$  Hz,  $J_2 = 9.3$  Hz, 1H), 2.99-2.88 (m, 1H), 2.67 (dd,  $J_1 = 13.4$  Hz,  $J_2 = 5.0$  Hz, 1H), 2.40 (d,  $J = 41.9$  Hz, 1H), 1.80-1.01 (m, 23H) ppm;  $^{13}\text{C NMR}$  (126 MHz,  $\text{CDCl}_3$ ):  $\delta = 173.7, 148.6, 146.4, 129.9$  (2C), 123.3 (2C), 57.8, 56.2, 40.4, 38.8, 31.5, 31.2, 30.1, 29.9, 26.5 (2C), 26.0 (2C), 25.3, 25.1, 18.8 ppm; HRMS (ESI-TOF): calcd.  $\text{C}_{22}\text{H}_{32}\text{N}_2\text{O}_3\text{Na}$   $[\text{M}+\text{Na}]^+$  395.2305; found:

395.2322.

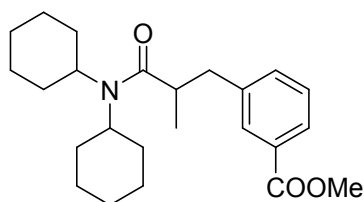

**Methyl 3-(3-(dicyclohexylamino)-2-methyl-3-oxopropyl)benzoate (3ah):** Solid (74%, mono-diarylation = 32:1, 56.9 mg);  $R_f = 0.51$  (petroleum ether-EtOAc = 7:1);  $^1\text{H NMR}$  (500 MHz,  $\text{CDCl}_3$ ):  $\delta = 7.89\text{--}7.82$  (m, 2H), 7.37 (d,  $J = 7.6$  Hz, 1H), 7.31 (t,  $J = 7.6$  Hz, 1H), 3.88 (d,  $J = 0.8$  Hz, 3H), 3.35 (s, 1H), 3.06 (t,  $J = 11.0$  Hz, 1H), 2.93 (h,  $J = 6.2$  Hz, 1H), 2.65 (dd,  $J_1 = 13.1$  Hz,  $J_2 = 5.5$  Hz, 1H), 2.46 (s, 1H), 1.91-1.51 (m, 7H), 1.46-0.81 (m, 16H) ppm;  $^{13}\text{C NMR}$  (126 MHz,  $\text{CDCl}_3$ ):  $\delta = 174.4, 167.1, 140.9, 134.0, 130.0, 130.0, 128.2, 127.3, 57.7, 56.2, 51.9, 40.6, 38.8, 31.6, 31.0, 30.2, 29.9, 26.6$  (2C), 26.0 (2C), 25.4, 25.2, 18.6 ppm; HRMS (ESI-TOF): calcd.  $\text{C}_{24}\text{H}_{35}\text{NO}_3\text{Na}$   $[\text{M}+\text{Na}]^+$  408.2509, found: 408.2528.

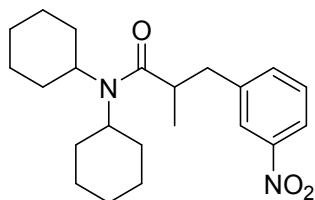

**N,N-dicyclohexyl-2-methyl-3-(3-nitrophenyl)propanamide (3ai):** Solid (79%, 58.8 mg);  $R_f = 0.49$  (petroleum ether-EtOAc = 7:1);  $^1\text{H NMR}$  (500 MHz,  $\text{CDCl}_3$ ):  $\delta = 8.07\text{--}7.96$  (m, 2H), 7.50 (d,  $J = 7.6$  Hz, 1H), 7.38 (t,  $J = 7.8$  Hz, 1H), 3.35 (s, 1H), 3.14 (dd,  $J_1 = 13.4$  Hz,  $J_2 = 9.3$  Hz, 1H), 2.99-2.88 (m, 1H), 2.67 (dd,  $J_1 = 13.4$  Hz,  $J_2 = 5.0$  Hz, 1H), 2.40 (d,  $J = 41.9$  Hz, 1H), 1.82-1.33 (m, 10H), 1.30-0.91 (m, 13H) ppm;  $^{13}\text{C NMR}$  (126 MHz,  $\text{CDCl}_3$ ):  $\delta = 173.7, 148.0, 142.6, 135.6, 128.9, 123.5, 121.0, 57.7, 56.2, 40.0, 38.6, 31.5, 31.2, 30.1, 29.8, 26.5$  (2C), 25.9 (2C), 25.3, 25.1, 18.6 ppm; HRMS (ESI-TOF): calcd.  $\text{C}_{22}\text{H}_{32}\text{N}_2\text{O}_3\text{Na}$   $[\text{M}+\text{Na}]^+$  395.2305; found: 395.2324.

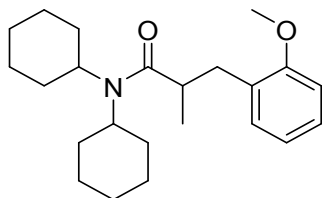

**N,N-dicyclohexyl-3-(2-methoxyphenyl)-2-methylpropanamide (3aj):** Solid (41%, 29.3 mg);  $R_f = 0.31$  (petroleum ether-EtOAc = 10:1);  $^1\text{H NMR}$  (500 MHz,  $\text{CDCl}_3$ ):  $\delta = 7.22\text{--}7.11$  (m, 2H), 6.90-6.83 (m, 2H), 3.86 (s, 3H), 3.14-3.08 (m, 1H), 2.88 (s, 1H), 2.69 (s, 1H), 2.52 (s, 1H), 1.86-1.03 (m, 24H).ppm;  $^{13}\text{C NMR}$  (126 MHz,  $\text{CDCl}_3$ ):  $\delta = 172.5, 157.4, 131.7, 128.3, 127.4$  (2C), 120.3 (2C), 109.8, 57.4, 56.1, 55.1, 36.1, 31.7, 30.3, 30.1, 26.7 (2C), 26.1 (2C), 25.5, 25.3, 18.1 ppm; HRMS (ESI-TOF): calcd.  $\text{C}_{23}\text{H}_{36}\text{NO}_2$   $[\text{M}+\text{H}]^+$  358.2741; found: 358.2731.

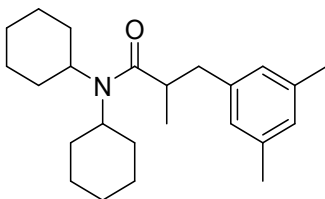

**N,N-dicyclohexyl-3-(3,5-dimethylphenyl)-2-methylpropanamide (3ak):** Colorless oil (40%, mono-diarylation = 19:1), 28.4 mg);  $R_f = 0.51$  (petroleum ether-EtOAc = 7:1);  $^1\text{H NMR}$  (500 MHz,  $\text{CDCl}_3$ ):

$\delta = 6.81$  (s, 3H), 3.37 (s, 1H), 2.92 (d,  $J = 5.9$  Hz, 2H), 2.56 (q,  $J_1 = 8.3$  Hz,  $J_2 = 7.3$  Hz, 2H), 2.27 (s, 6H), 1.87-1.39 (m, 10H), 1.30-0.84 (m, 13H) ppm;  $^{13}\text{C}$  NMR (126 MHz,  $\text{CDCl}_3$ ):  $\delta = 175.0$ , 140.2, 137.4 (2C), 127.4, 126.9 (2C), 57.7, 56.2, 40.9, 38.8, 31.6, 30.9, 30.0, 29.8, 26.6 (2C), 26.0 (2C), 25.4, 25.2, 21.1 (2C), 18.6 ppm; HRMS (ESI-TOF): calcd.  $\text{C}_{24}\text{H}_{37}\text{NONa}$   $[\text{M}+\text{Na}]^+$  378.2767; found: 378.2775.

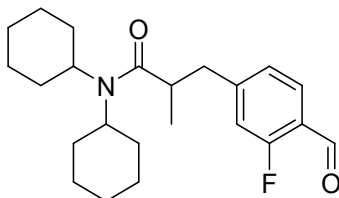

**N,N-dicyclohexyl-3-(3-fluoro-4-formylphenyl)-2-methylpropanamide (3al):** Solid (51%, 38.0 mg);  $R_f = 0.51$  (petroleum ether-EtOAc = 3:1);  $^1\text{H}$  NMR (500 MHz,  $\text{CDCl}_3$ ):  $\delta = 10.29$  (s, 1H), 7.75 (t,  $J = 7.6$  Hz, 1H), 7.09 (d,  $J = 8.0$  Hz, 1H), 7.04-6.98 (m, 1H), 3.35 (s, 1H), 3.13 (dd,  $J_1 = 13.1$  Hz,  $J_2 = 9.1$  Hz, 1H), 3.00-2.86 (m, 1H), 2.64 (dd,  $J_1 = 13.2$  Hz,  $J_2 = 5.2$  Hz, 1H), 2.45 (s, 1H), 1.83-1.52 (m, 8H), 1.49-0.98 (m, 15H) ppm;  $^{13}\text{C}$  NMR (126 MHz,  $\text{CDCl}_3$ ):  $\delta = 186.9$  (d,  $J = 6.3$  Hz), 173.8, 164.6 (d,  $J = 258.8$  Hz), 151.1, 128.4 (d,  $J = 2.3$  Hz), 125.5, 122.2 (d,  $J = 8.1$  Hz), 117.0 (d,  $J = 20.5$  Hz), 57.8, 56.3, 40.7, 38.6, 31.5, 31.3, 30.2, 30.0, 26.6 (2C), 26.1 (2C), 25.4, 25.2, 18.8 ppm; HRMS (ESI-TOF): calcd.  $\text{C}_{23}\text{H}_{32}\text{FNO}_2\text{Na}$   $[\text{M}+\text{Na}]^+$  396.2309; found: 396.2318.

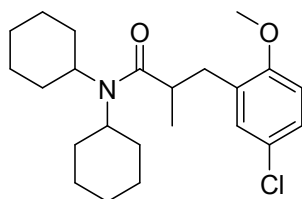

**3-(5-chloro-2-methoxyphenyl)-N,N-dicyclohexyl-2-methylpropanamide (3am):** Solid (72%, 56.3 mg);  $R_f = 0.35$  (petroleum ether-EtOAc = 10:1);  $^1\text{H}$  NMR (500 MHz,  $\text{CDCl}_3$ ):  $\delta = 7.14$ -7.07 (m, 2H), 6.73 (d,  $J = 8.6$  Hz, 1H), 3.82 (s, 3H), 3.42 (s, 1H), 3.06-3.01 (m, 1H), 2.87-2.77 (m, 1H), 2.58 (m, 2H), 1.84-0.96 (m, 23H) ppm;  $^{13}\text{C}$  NMR (126 MHz,  $\text{CDCl}_3$ ):  $\delta = 175.2$ , 156.0, 131.2 (2C), 130.3, 126.9 (2C), 125.1, 110.9, 57.6, 56.2, 55.4, 31.7, 31.0, 30.3, 30.1, 26.7 (2C), 26.1 (2C), 25.5, 25.3, 18.3 ppm; HRMS (ESI-TOF): calcd.  $\text{C}_{23}\text{H}_{35}\text{ClNO}_2$   $[\text{M}+\text{H}]^+$  392.2351; found: 392.2338.

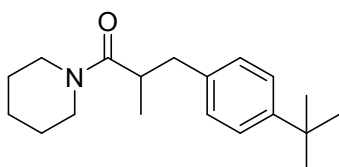

**3-(4-(tert-Butyl)phenyl)-2-methyl-1-(piperidin-1-yl)propan-1-one (3an):** Colorless oil (41%, mono-di-arylation = 10:1, 23.6 mg);  $R_f = 0.38$  (petroleum ether-EtOAc = 4:1);  $^1\text{H}$  NMR (500 MHz,  $\text{CDCl}_3$ )  $\delta = 7.30$  (d,  $J = 8.3$  Hz, 2H), 7.12 (d,  $J = 8.2$  Hz, 2H), 3.76 (dd,  $J_1 = 13.0$  Hz,  $J_2 = 6.2$  Hz, 1H), 3.30 (qt,  $J_1 = 10.6$  Hz,  $J_2 = 5.0$  Hz, 2H), 3.24-3.19 (m, 1H), 3.09-2.92 (m, 2H), 2.67-2.61 (m, 1H), 1.78 (s, 1H), 1.53-1.49 (m, 2H), 1.40-1.34 (m, 2H), 1.31 (s, 9H), 1.16 (d,  $J = 6.5$  Hz, 3H), 1.01-0.92 (m, 1H) ppm;  $^{13}\text{C}$  NMR (126 MHz,  $\text{CDCl}_3$ )  $\delta = 174.2$ , 148.9, 137.2, 128.7 (2C), 125.1 (2C), 46.6, 42.9, 40.2, 37.4, 34.3, 31.4 (3C), 26.2, 25.5, 24.5, 17.9 ppm; HRMS (ESI-TOF)  $m/z$ :  $[\text{M}+\text{Na}]^+$  Calcd. for  $\text{C}_{19}\text{H}_{29}\text{NONa}$  310.2141; found: 310.2147.

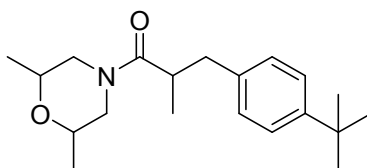

**3-(4-(tert-Butyl)phenyl)-1-(2,6-dimethylmorpholino)-2-methylpropan-1-one (3ao) (1.0:0.55 mixture of rotamers):** Colorless oil (37%, mono-:di-arylation = 12:1, 23.5 mg);  $R_f = 0.38$  (petroleum ether-EtOAc = 4:1); major:  $^1\text{H NMR}$  (500 MHz,  $\text{CDCl}_3$ )  $\delta = 7.30$  (d,  $J = 8.4$  Hz, 2H), 7.12 (d,  $J = 8.2$  Hz, 2H), 4.47 (d,  $J = 13.2$  Hz, 1H), 3.57-2.51 (m, 6H), 2.31-2.15 (m, 2H), 1.30 (s, 9H), 1.21 (d,  $J = 6.5$  Hz, 3H), 1.12 (d,  $J = 6.2$  Hz, 3H), 0.94 (d,  $J = 6.2$  Hz, 3H).ppm;  $^{13}\text{C NMR}$  (126 MHz,  $\text{CDCl}_3$ )  $\delta = 174.0, 149.4, 137.0, 128.8$  (2C), 125.3 (2C), 71.7, 71.1, 51.3, 47.2, 40.8, 37.5, 34.4, 31.4 (3C), 18.7, 18.5, 18.0 ppm; minor:  $^1\text{H NMR}$  (500 MHz,  $\text{CDCl}_3$ )  $\delta = 7.30$  (d,  $J = 8.4$  Hz, 2H), 7.09 (d,  $J = 7.9$  Hz, 2H), 4.47 (d,  $J = 13.2$  Hz, 1H), 3.57-2.51 (m, 6H), 2.31-2.15 (m, 2H), 1.31 (s, 9H), 1.18 (d,  $J = 2.7$  Hz, 3H), 1.17 (d,  $J = 2.9$  Hz, 3H), 1.12 (d,  $J = 6.2$  Hz, 3H) ppm;  $^{13}\text{C NMR}$  (126 MHz,  $\text{CDCl}_3$ )  $\delta = 174.5, 149.2, 136.8, 128.7$  (2C), 125.2 (2C), 71.9, 71.1, 50.9, 47.0, 39.9, 37.6, 34.4, 31.4 (3C), 18.7, 18.3, 18.0 ppm; HRMS (ESI-TOF)  $m/z$ :  $[\text{M}+\text{Na}]^+$  Calcd. for  $\text{C}_{20}\text{H}_{31}\text{NO}_2\text{Na}$  340.2247; found: 340.2251.

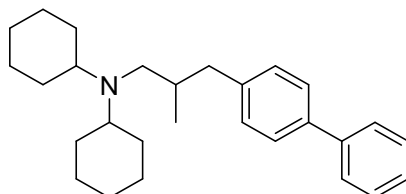

**N-(3-([1,1'-biphenyl]-4-yl)-2-methylpropyl)-N-cyclohexylcyclohexanamine (4):** Colorless oil (96%, 37.3 mg);  $R_f = 0.58$  (petroleum ether-EtOAc = 10:1);  $^1\text{H NMR}$  (500 MHz,  $\text{CDCl}_3$ ):  $\delta = 7.61$  (d,  $J = 7.3$  Hz, 2H), 7.53 (d,  $J = 8.1$  Hz, 2H), 7.45 (t,  $J = 7.7$  Hz, 2H), 7.34 (t,  $J = 7.4$  Hz, 1H), 7.25 (d,  $J = 7.8$  Hz, 2H), 3.06 (d,  $J = 9.6$  Hz, 1H), 2.48 (d,  $J = 39.6$  Hz, 4H), 2.10 (t,  $J = 11.5$  Hz, 1H), 1.69 (dd,  $J_1 = 62.8$  Hz,  $J_2 = 17.3$  Hz, 9H), 1.27 (d,  $J = 16.5$  Hz, 10H), 1.13-1.05 (m, 2H), 0.84 (d,  $J = 6.6$  Hz, 3H) ppm;  $^{13}\text{C NMR}$  (126 MHz,  $\text{CDCl}_3$ ):  $\delta = 141.7, 141.3, 138.3, 129.5$  (2C), 128.7 (2C), 126.9 (2C), 126.9, 126.8 (2C), 58.1, 52.9, 41.1, 35.4, 32.4 (2C), 32.1 (2C), 29.7, 26.8 (2C), 26.7 (2C), 26.4 (2C), 17.8 ppm; HRMS (ESI-TOF): calcd.  $\text{C}_{28}\text{H}_{40}\text{N}$   $[\text{M}+\text{H}]^+$  390.3155; found: 390.3160.

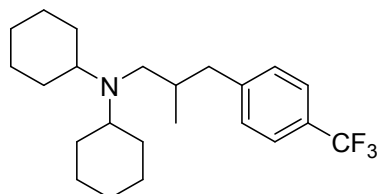

**N-cyclohexyl-N-(2-methyl-3-(4-(trifluoromethyl)phenyl)propyl)cyclohexanamine (5):** Colorless oil (94%, 35.8 mg);  $R_f = 0.56$  (petroleum ether-EtOAc = 10:1);  $^1\text{H NMR}$  (500 MHz,  $\text{CDCl}_3$ ):  $\delta = 7.53$  (d,  $J = 8.0$  Hz, 2H), 7.26 (d,  $J = 8.2$  Hz, 2H), 3.10 (d,  $J = 15.8$  Hz, 1H), 2.54-2.32 (m, 4H), 2.14-2.02 (m, 1H), 1.78-1.56 (m, 10H), 1.28-1.17 (m, 8H), 1.07 (dd,  $J_1 = 16.9$  Hz,  $J_2 = 7.8$  Hz, 2H), 0.93-0.83 (m, 1H), 0.78 (d,  $J = 6.2$  Hz, 3H) ppm;  $^{13}\text{C NMR}$  (126 MHz,  $\text{CDCl}_3$ ):  $\delta = 146.9, 129.4$  (2C), 127.9 (q,  $J = 6.1$  Hz), 125.0 (q,  $J = 3.9$  Hz), 124.5 (q,  $J = 271.6$  Hz, 2C), 58.1, 52.8, 41.3, 35.5, 32.5 (2C), 32.0 (2C), 29.7, 26.8 (2C), 26.7 (2C), 26.4 (2C), 17.6 ppm; HRMS (ESI-TOF): calcd.  $\text{C}_{23}\text{H}_{35}\text{F}_3\text{N}$   $[\text{M}+\text{H}]^+$  382.2716; found: 382.2721.

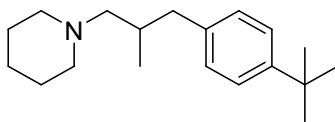

**1-(3-(4-(tert-Butyl)phenyl)-2-methylpropyl)piperidine (6):** Colorless oil (39%, 10.6 mg);  $R_f = 0.51$  (EtOAc-MeOH = 4:1);  $^1\text{H NMR}$  (500 MHz,  $\text{CDCl}_3$ ):  $\delta = 7.30$  (d,  $J = 8.3$  Hz, 2H), 7.10 (d,  $J = 8.2$  Hz, 2H), 2.80 (dd,  $J_1 = 13.5$  Hz,  $J_2 = 4.8$  Hz, 1H), 2.43-2.26 (m, 5H), 2.23-2.19 (m, 2H), 1.99 (dq,  $J_1 = 13.6$  Hz,  $J_2 = 6.9$  Hz, 1H), 1.61 (p,  $J = 5.5$  Hz, 4H), 1.45 (d,  $J = 5.4$  Hz, 2H), 1.33 (s, 9H), 0.87 (d,  $J = 6.6$  Hz, 3H) ppm;  $^{13}\text{C NMR}$  (126 MHz,  $\text{CDCl}_3$ ):  $\delta = 148.3, 138.2, 128.9$  (2C), 124.9 (2C), 65.8, 55.0 (2C), 40.9, 34.3, 32.4, 31.5 (3C), 29.7, 26.0, 24.6, 18.3 ppm; HRMS (ESI-TOF): calcd.  $\text{C}_{19}\text{H}_{32}\text{N}$   $[\text{M}+\text{H}]^+$  274.2529; found: 274.2536.

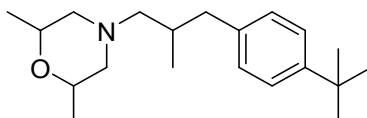

**4-(3-(4-(tert-Butyl)phenyl)-2-methylpropyl)-2,6-dimethylmorpholine (7):** Colorless oil (35%, 10.6 mg);  $R_f = 0.41$  (petroleum ether-EtOAc = 1:5);  $^1\text{H NMR}$  (500 MHz,  $\text{CDCl}_3$ ):  $\delta = 7.31$  (d,  $J = 8.3$  Hz, 2H), 7.10 (d,  $J = 8.3$  Hz, 2H), 3.77 (s, 2H), 2.76 (dd,  $J_1 = 13.4$  Hz,  $J_2 = 4.9$  Hz, 3H), 2.50-1.99 (m, 5H), 1.74 (s, 1H), 1.33 (s, 9H), 1.17 (d,  $J = 1.4$  Hz, 3H), 1.16 (d,  $J = 1.4$  Hz, 3H), 0.91 (d,  $J = 6.6$  Hz, 3H) ppm;  $^{13}\text{C NMR}$  (126 MHz,  $\text{CDCl}_3$ ):  $\delta = 148.6, 128.8$  (2C), 125.0 (2C), 111.5, 71.3, 64.8, 40.9, 34.3, 31.9, 31.4 (2C), 30.3, 29.7 (2C), 29.3, 22.7, 19.1, 14.1 ppm; HRMS (ESI-TOF): calcd.  $\text{C}_{20}\text{H}_{34}\text{NO}$   $[\text{M}+\text{H}]^+$  304.2635; found: 304.2641.

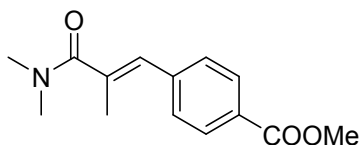

**Methyl (E)-4-(3-(dimethylamino)-2-methyl-3-oxoprop-1-en-1-yl)benzoate (3a<sup>1</sup>):** Solid (88%, 43.5 mg);  $R_f = 0.33$  (petroleum ether-EtOAc = 1:1);  $^1\text{H NMR}$  (500 MHz,  $\text{CDCl}_3$ ):  $\delta = 7.95$  (d,  $J = 8.4$  Hz, 2H), 7.31 (d,  $J = 8.3$  Hz, 2H), 6.40 (s, 1H), 3.90 (s, 3H), 2.94 (s, 3H), 2.70 (s, 3H), 2.11 (d,  $J = 1.5$  Hz, 3H) ppm;  $^{13}\text{C NMR}$  (126 MHz,  $\text{CDCl}_3$ ):  $\delta = 171.6, 166.8, 140.6, 135.7, 129.8$  (2C), 128.9 (2C), 127.3, 126.6, 52.1, 37.0, 34.2, 22.1 ppm; HRMS (ESI-TOF): calcd.  $\text{C}_{14}\text{H}_{17}\text{NO}_3$   $[\text{M}+\text{Na}]^+$  270.1101; found: 270.1107.

## 4. References

1. Mao, Y.-J., Lou, S.-J., Hao, H.-Y. and Xu, D.-Q. *Angew. Chem. Int. Ed.* 2018, **57**, 14085.
2. Park, H., Li, Y., and Yu, J.-Q. *Angew. Chem. Int. Ed.* 2019, **58**, 11424.
3. Yang, W.-J., Ling, B., Hu, B.-W., Yin, H.-L., Mao, J.-Y and Walsh, P. J. *Angew. Chem. Int. Ed.* 2020, **59**, 161.
4. a) Chen, M. Liu, F. and Dong, G. *Angew. Chem. Int. Ed.*, 2018, **57**, 3815; b) Deng, Y. Gong, He, W. J. and Yu, J.-Q. *Angew. Chem. Int. Ed.*, 2014, **53**, 6692.

## 5. NMR Spectra

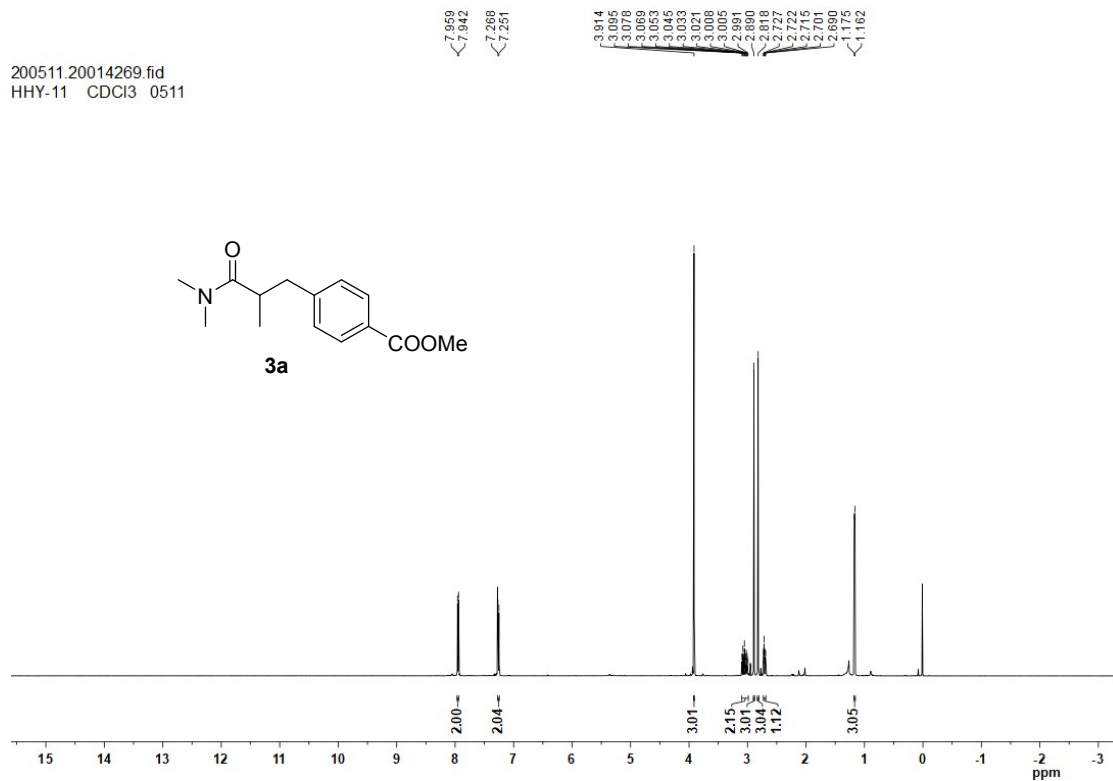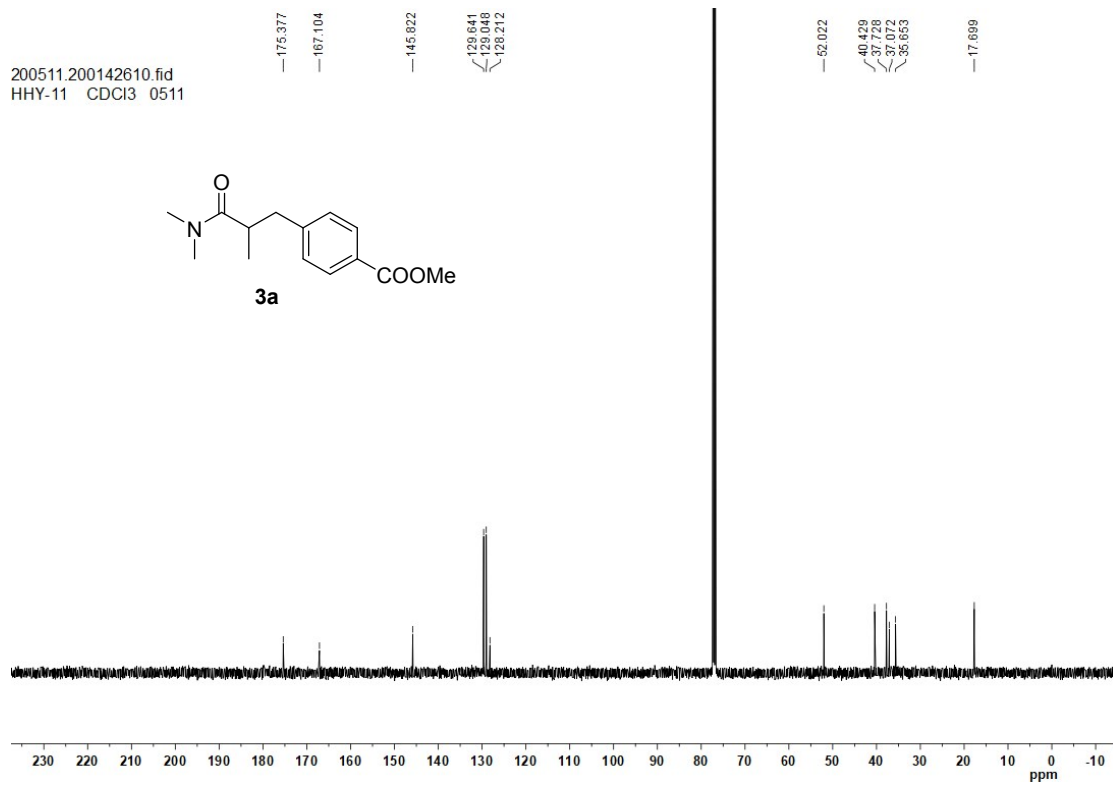

200511.200142613.fid  
HHY-13 CDCl3 0511

7.911  
7.892  
7.877  
7.861  
7.845  
7.830  
7.815  
7.798  
7.783  
7.767  
7.751  
7.736  
7.721  
4.398  
4.383  
4.368  
4.353  
4.338  
3.079  
3.063  
3.054  
3.044  
3.036  
3.026  
3.012  
2.997  
2.983  
2.893  
2.836  
2.726  
2.710  
2.703  
2.690  
1.414  
1.400  
1.386  
1.159  
1.146

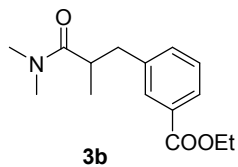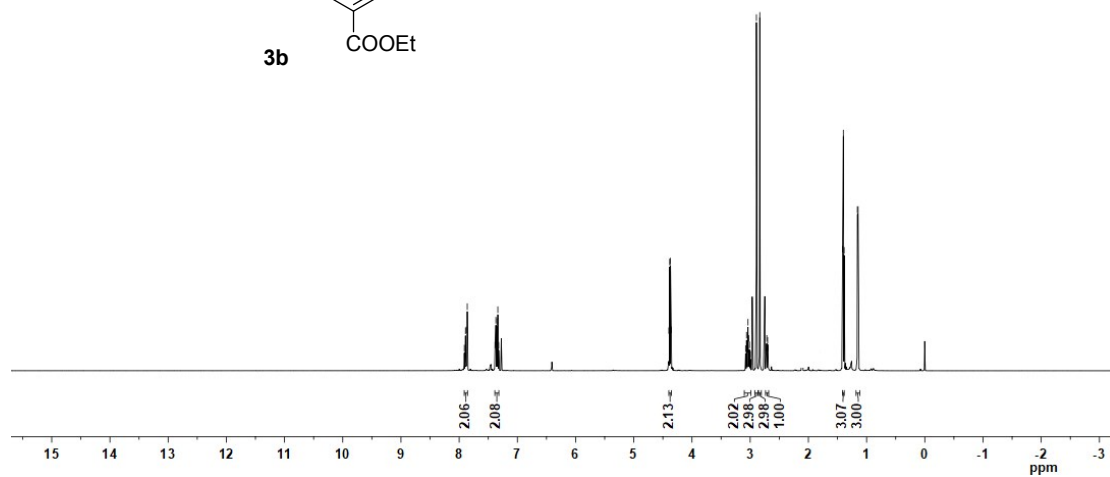

200511.200142614.fid  
HHY-13 CDCl3 0511

175.496  
166.704  
140.533  
133.712  
130.523  
128.774  
127.277  
127.445  
80.943  
40.096  
37.689  
37.073  
35.622  
17.500  
14.339

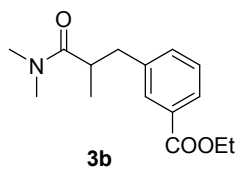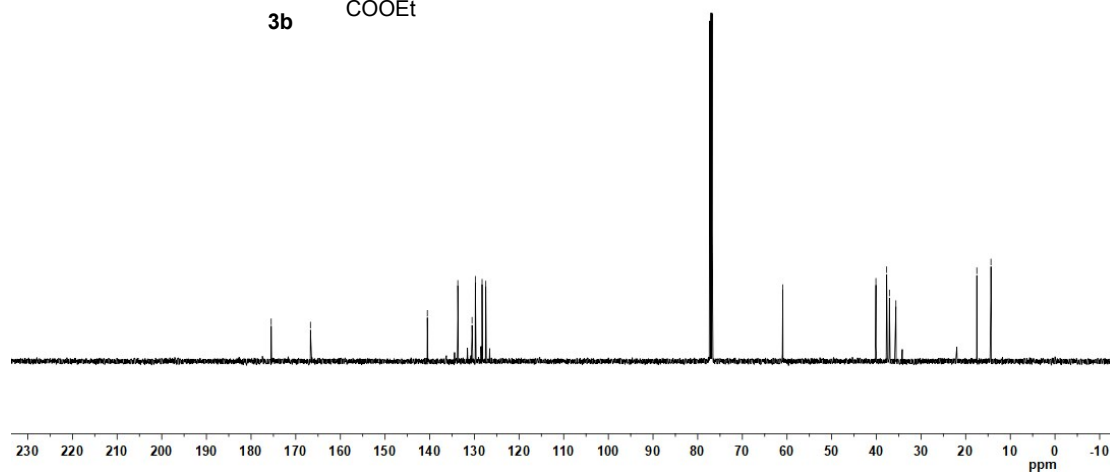

200511.20014267.fid  
HHY-10 CDCl3 0511

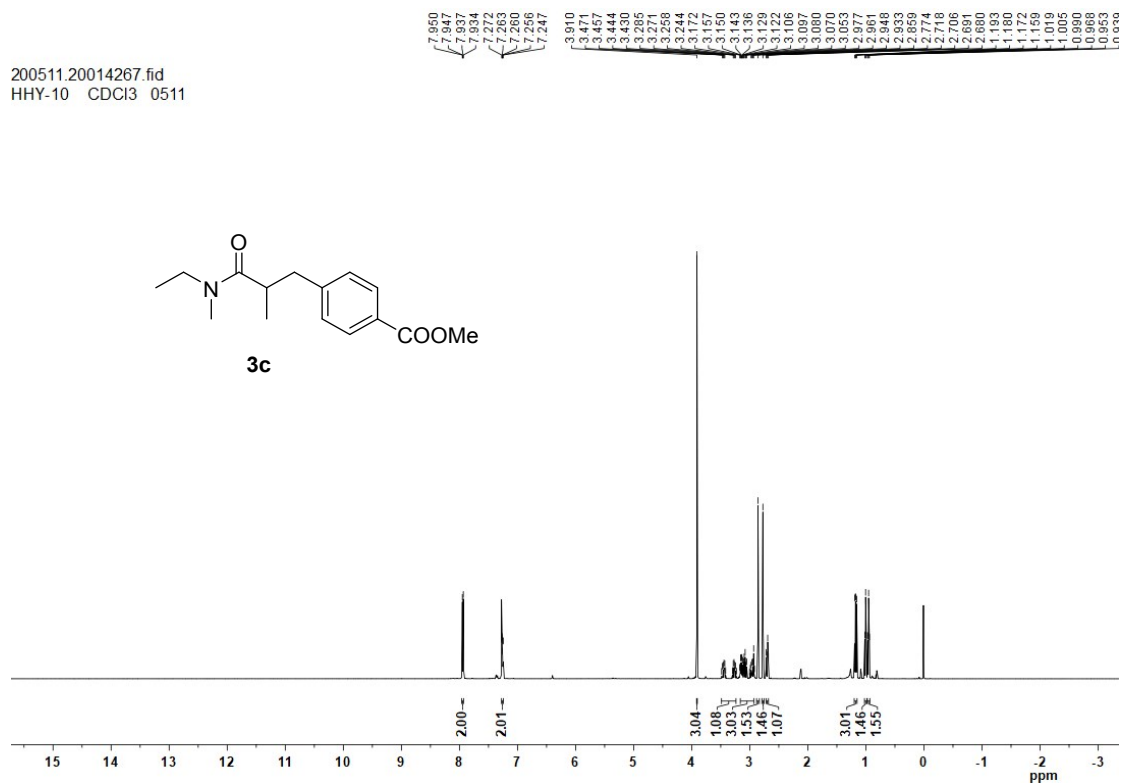

200511.20014268.fid  
HHY-10 CDCl3 0511

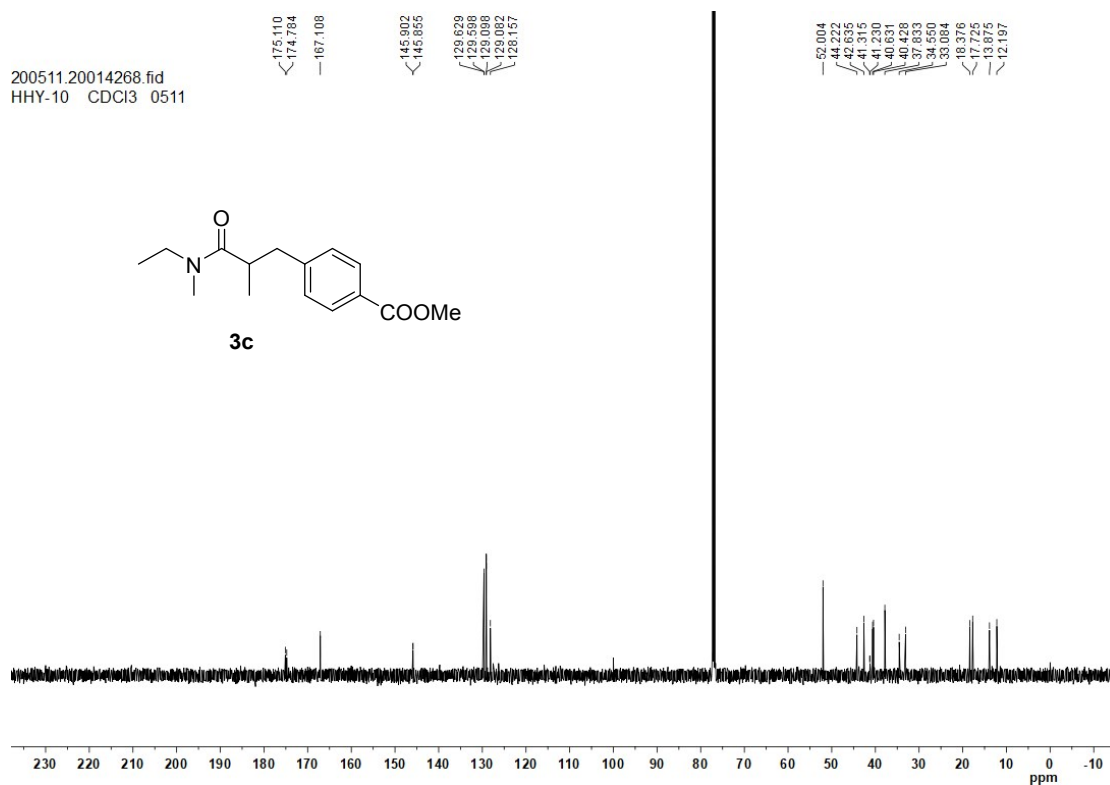



200511.20014265.fid  
HHY-6 CDCl3 0511

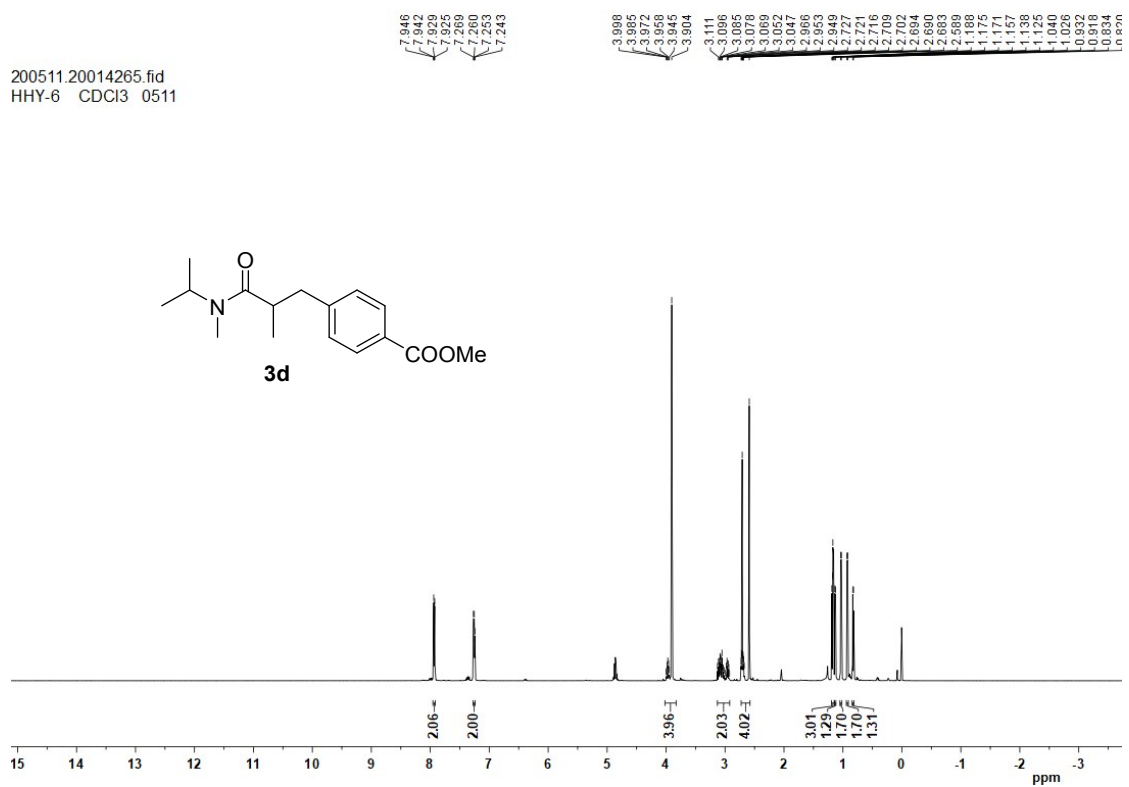

200511.20014266.fid  
HHY-6 CDCl3 0511

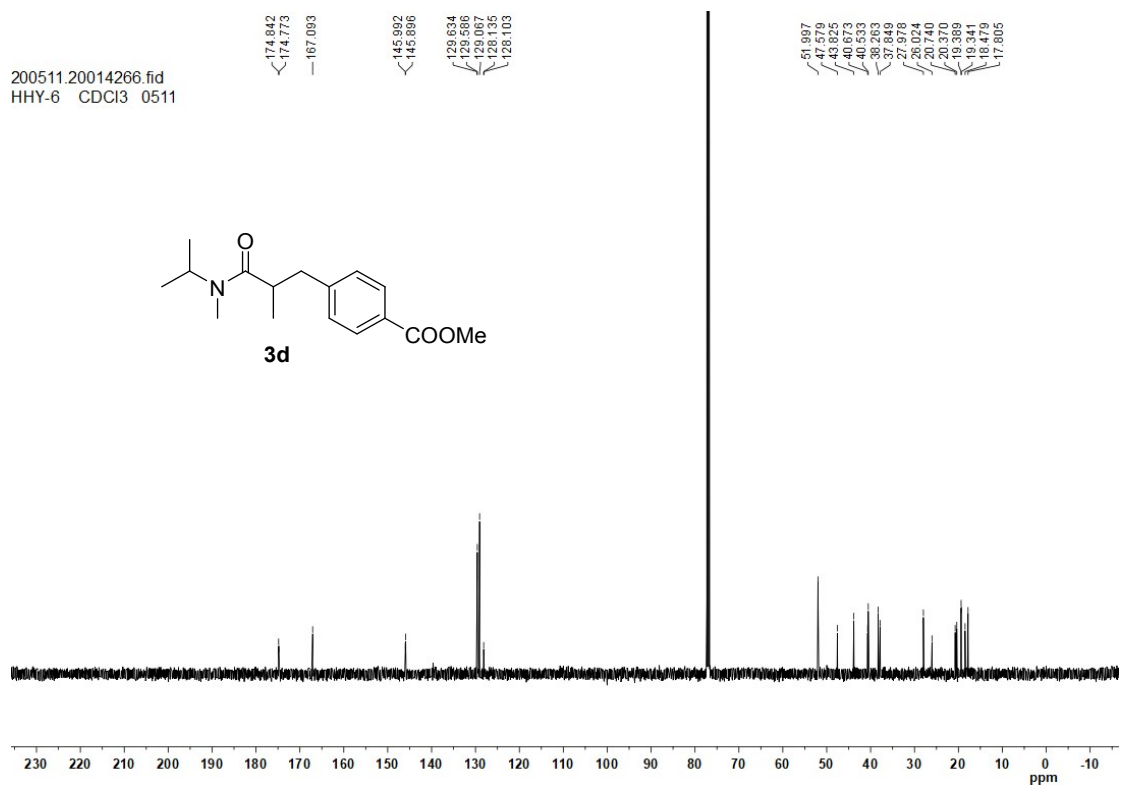



200113.20007704.fid  
HHY-9 CDCl3 0113

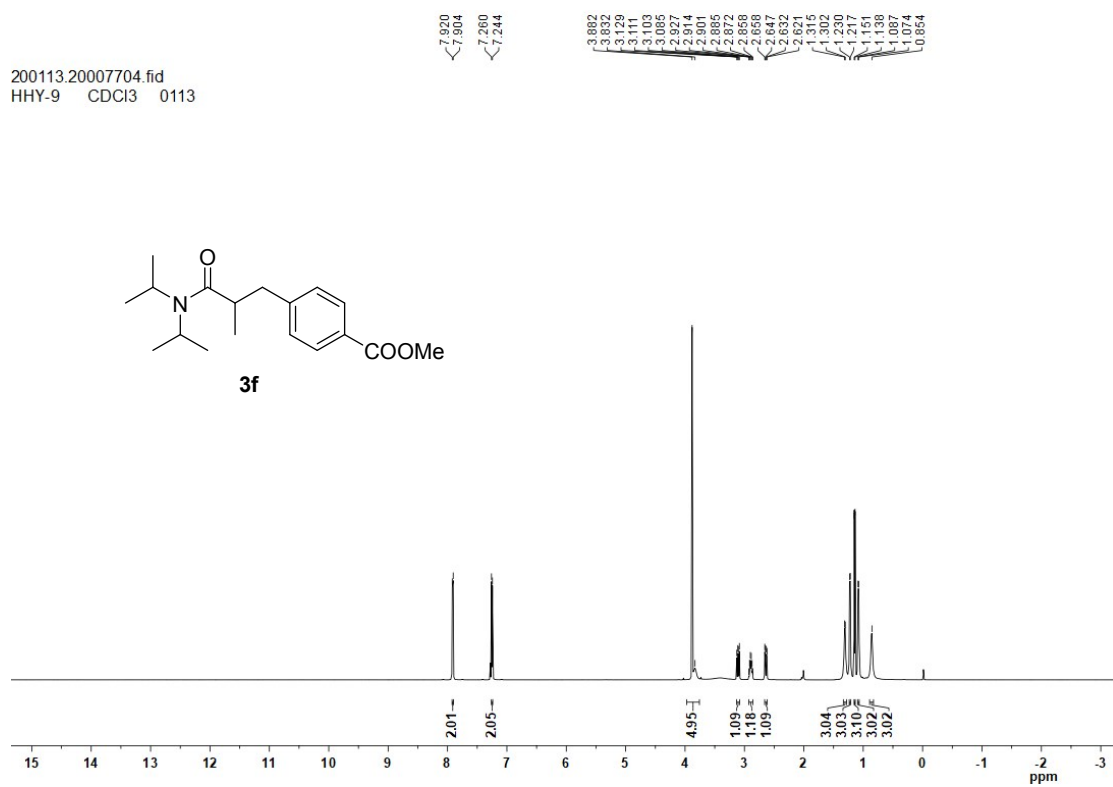

200113.20007703.fid  
HHY-9 CDCl3 0113

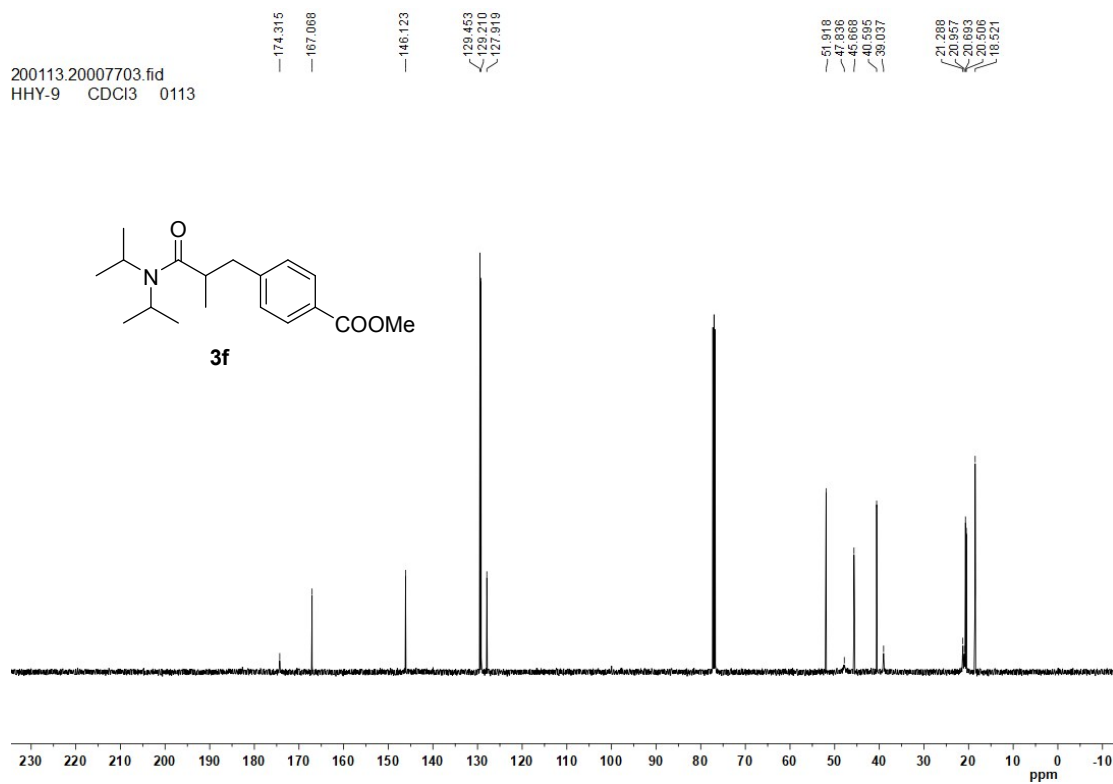

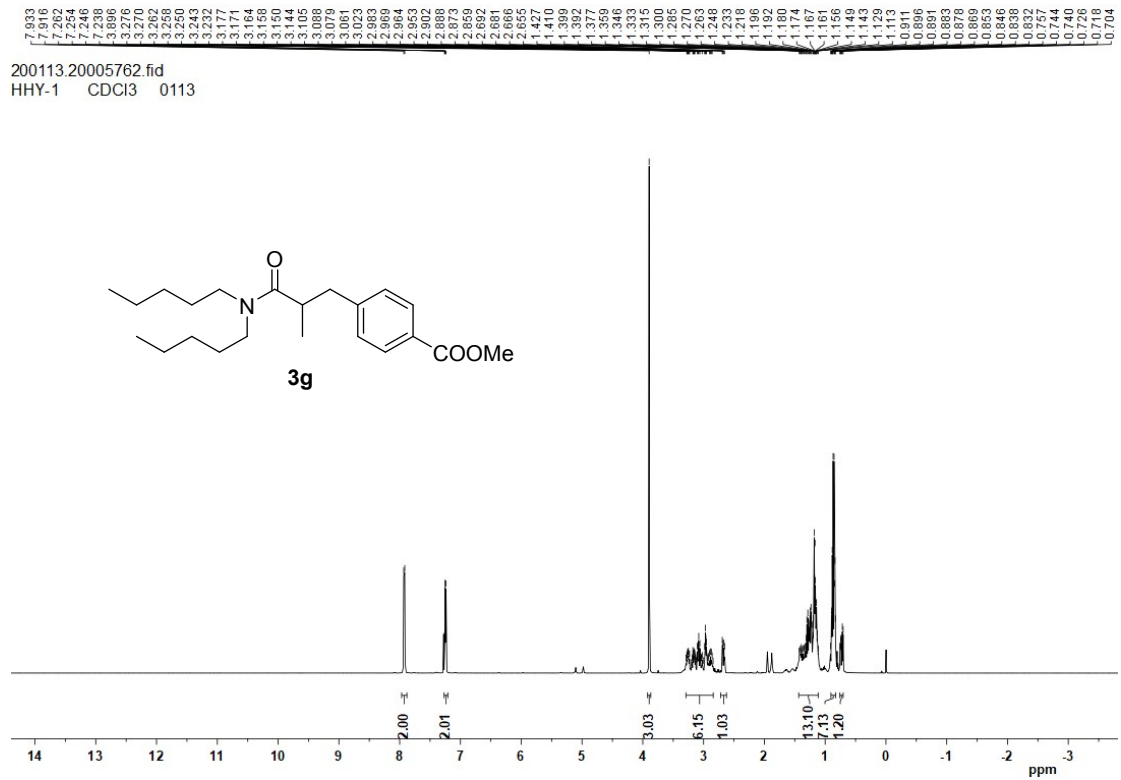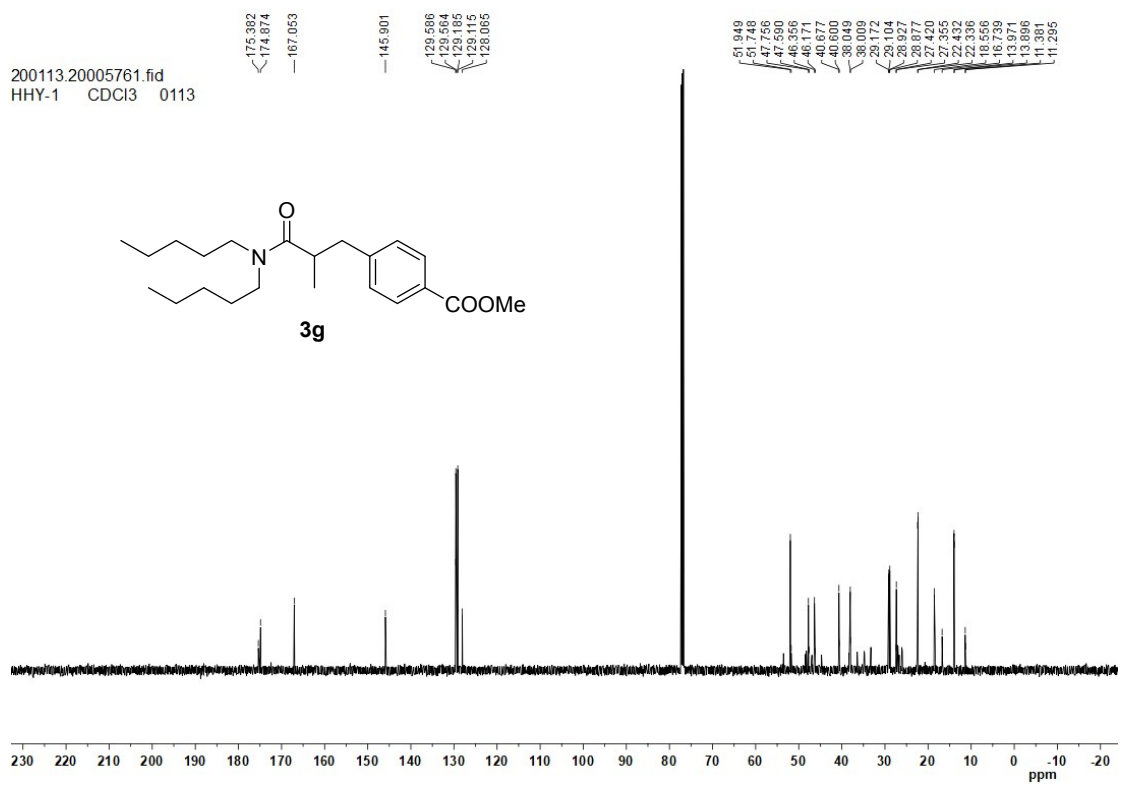

WYF-HHY-B-1/1

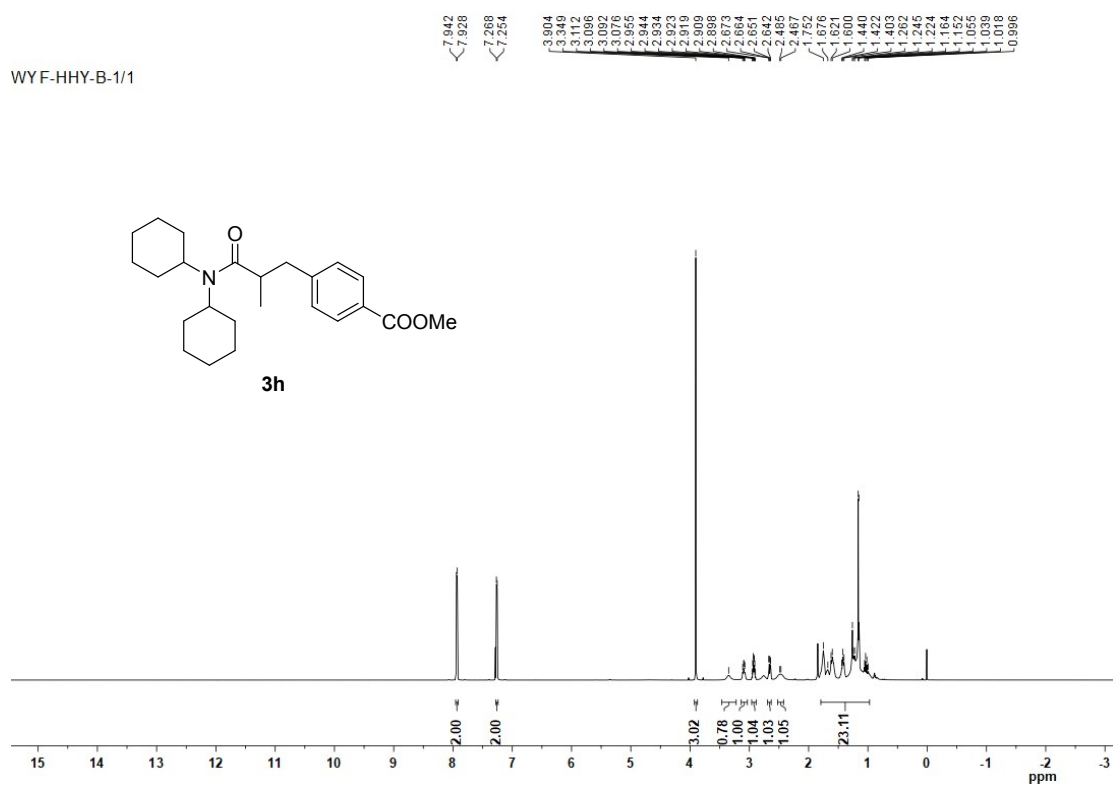

174.406, 167.097, 146.147, 128.512, 128.176, 127.974, 57.794, 56.144, 51.930, 40.818, 38.846, 31.883, 31.072, 30.217, 29.889, 26.622, 26.107, 25.431, 25.214, 16.742.

200703.2004150.fid  
HHY-B-1 CDCL3 0703

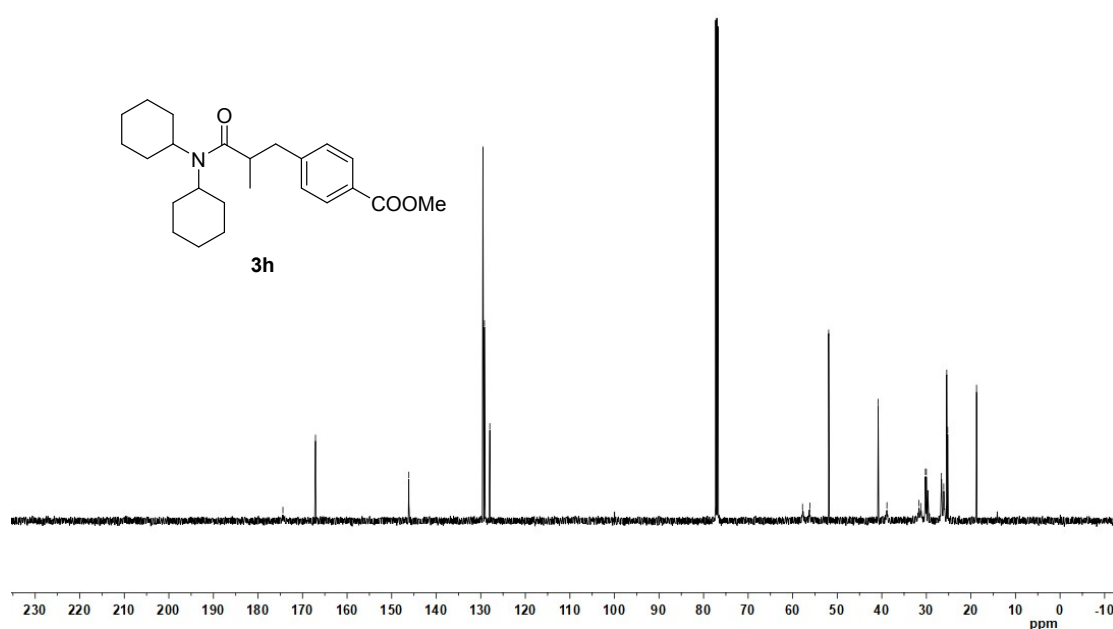

200113.20005766.fid  
 HHY-3 CDCl3 0113

7.945  
 7.938  
 7.936  
 7.932  
 3.906  
 3.483  
 3.477  
 3.470  
 3.463  
 3.449  
 3.436  
 3.425  
 3.412  
 3.400  
 3.397  
 3.356  
 3.351  
 3.331  
 3.320  
 3.312  
 3.305  
 3.287  
 3.287  
 3.083  
 3.066  
 3.057  
 3.040  
 2.999  
 2.974  
 2.974  
 2.973  
 2.967  
 2.853  
 2.843  
 2.829  
 2.815  
 2.815  
 2.803  
 2.799  
 2.786  
 2.773  
 2.719  
 2.696  
 2.680  
 2.671  
 2.658  
 2.644  
 2.631  
 2.617  
 2.617  
 1.851  
 1.851  
 1.819  
 1.811  
 1.806  
 1.799  
 1.787  
 1.766  
 1.760  
 1.744  
 1.724  
 1.715  
 1.703  
 1.693  
 1.676  
 1.676  
 1.187  
 1.174  
 1.136  
 1.123

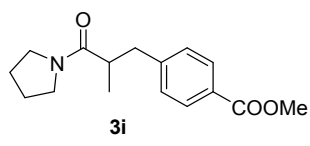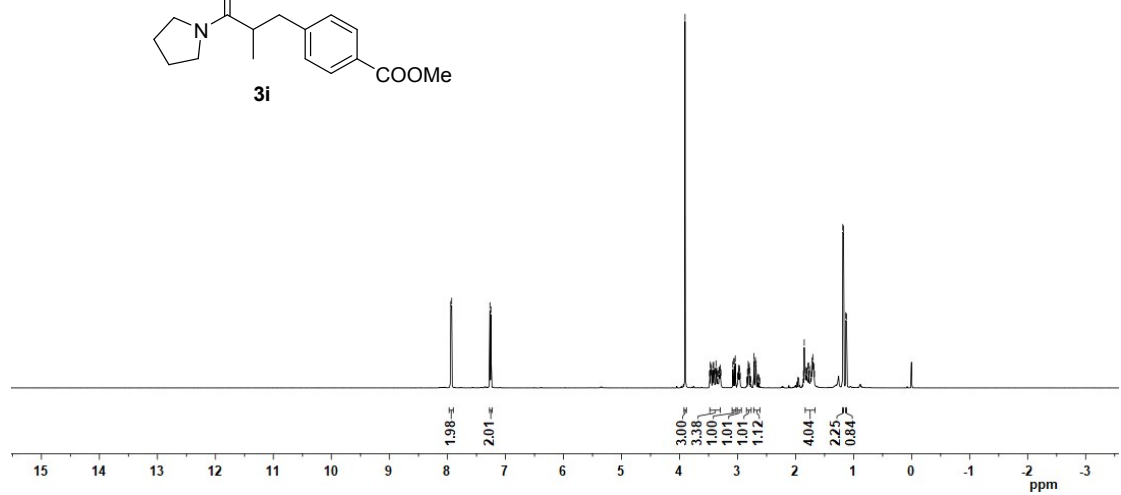

200511.20014262.fid  
 HHY-2 CDCl3 0511

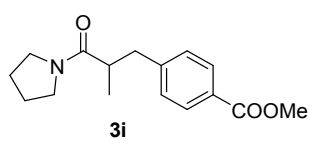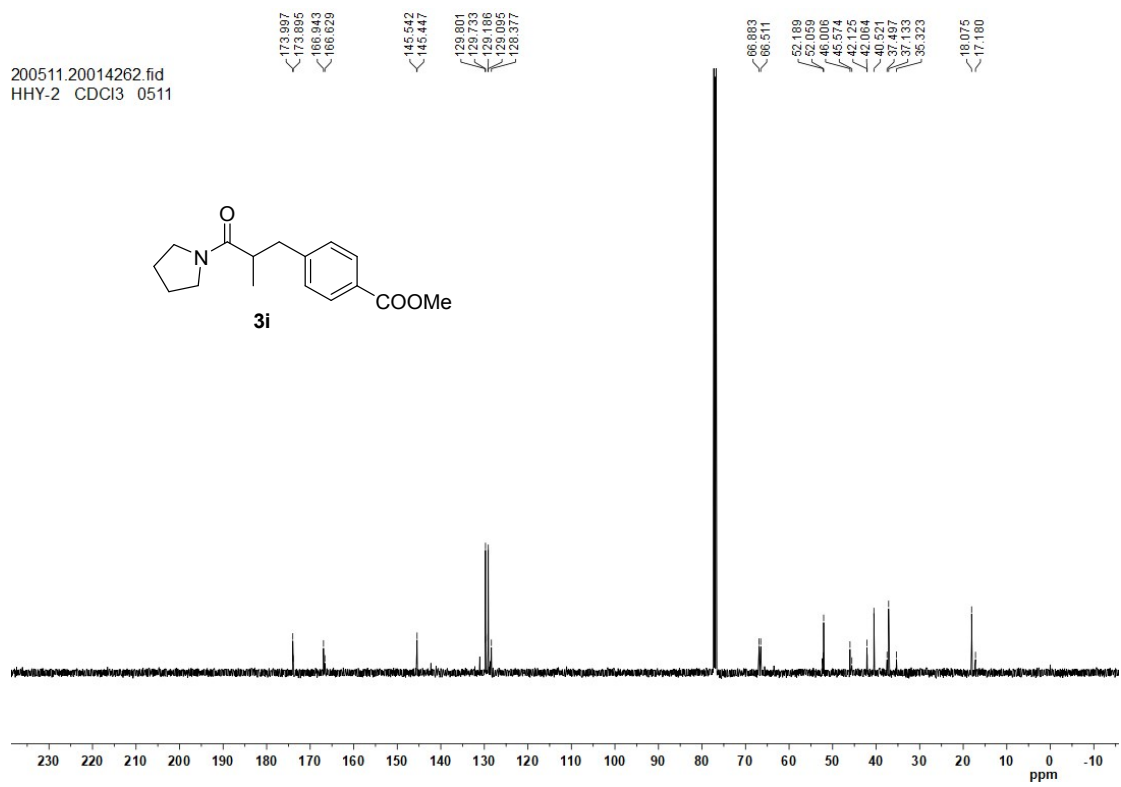

200113.20005768.fid  
 HHY-4 CDCl3 0113

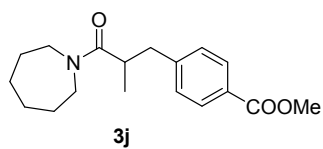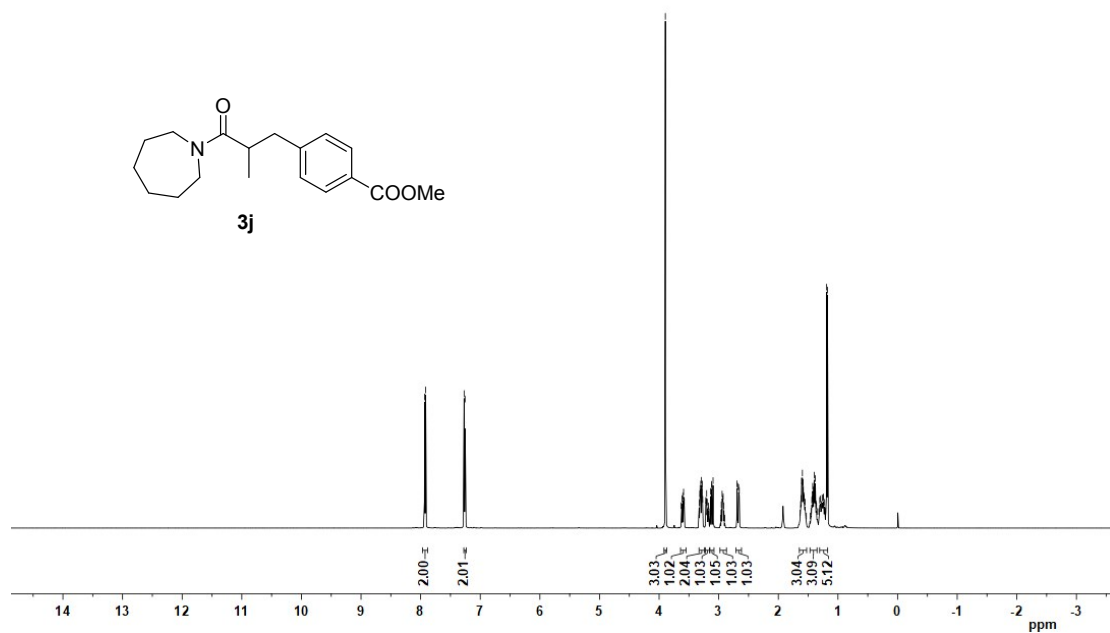

200113.20005767.fid  
 HHY-4 CDCl3 0113

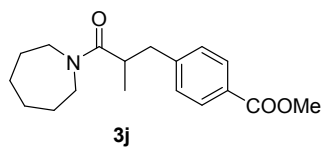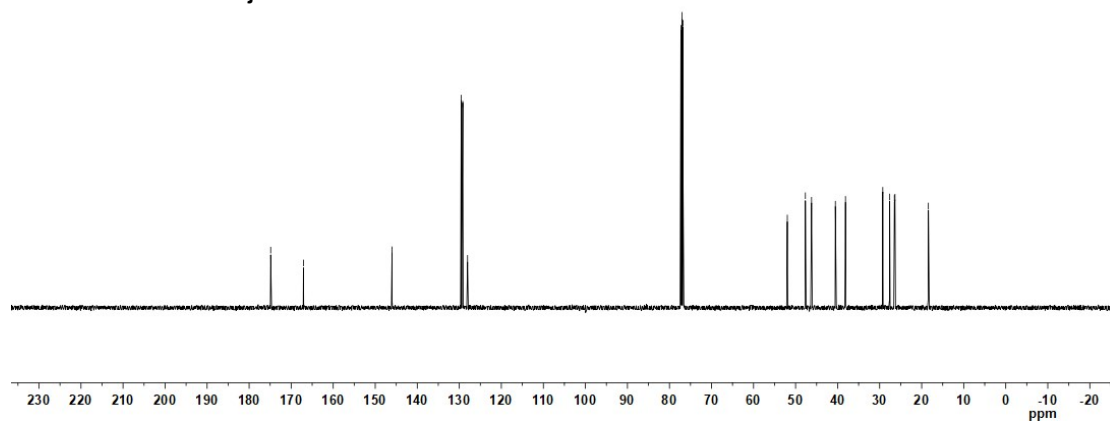

200703.20045112.fid  
HHY-B-5 CDCL3 0703

8.156  
8.139  
7.366  
7.349  
3.624  
3.594  
3.564  
3.587  
3.560  
3.572  
3.556  
3.536  
3.536  
3.422  
3.414  
3.401  
3.377  
3.357  
3.350  
3.333  
3.303  
3.294  
3.283  
3.269  
3.197  
3.190  
3.154  
3.023  
3.010  
2.897  
2.884  
2.880  
2.863  
2.853  
2.807  
2.795  
2.781  
2.769  
1.212  
1.189

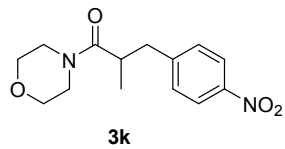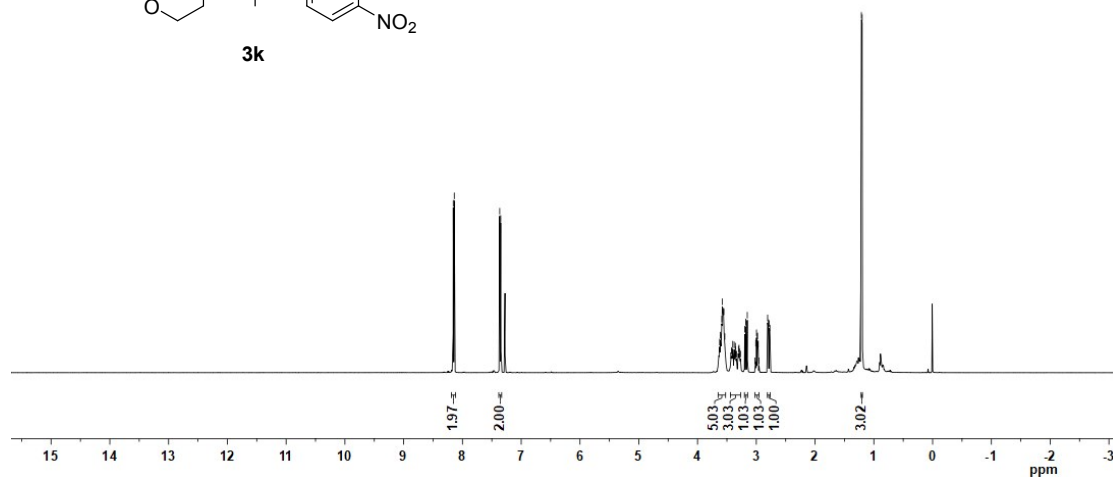

200703.20045111.fid  
HHY-B-5 CDCL3 0703

173.469  
147.909  
146.686  
129.899  
123.607  
66.914  
66.600  
46.020  
42.190  
39.908  
37.192  
18.080

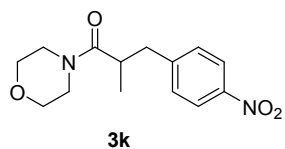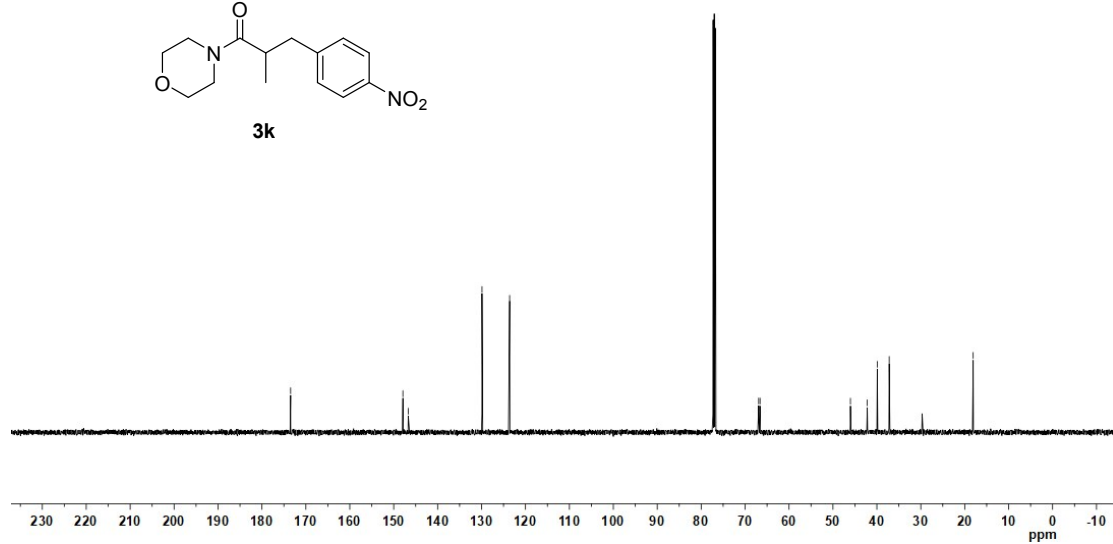



200724.20056111.fid  
HHY-B-2 CDCI3 0724

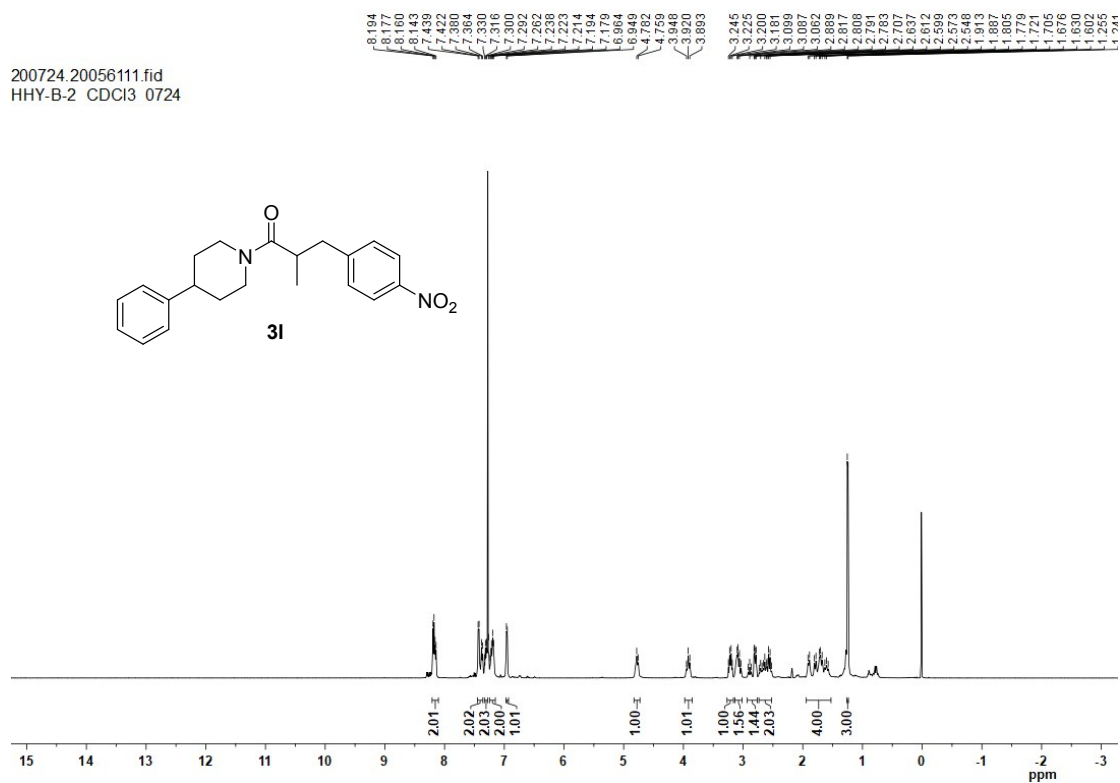

200724.20056112.fid  
HHY-B-2 CDCI3 0724

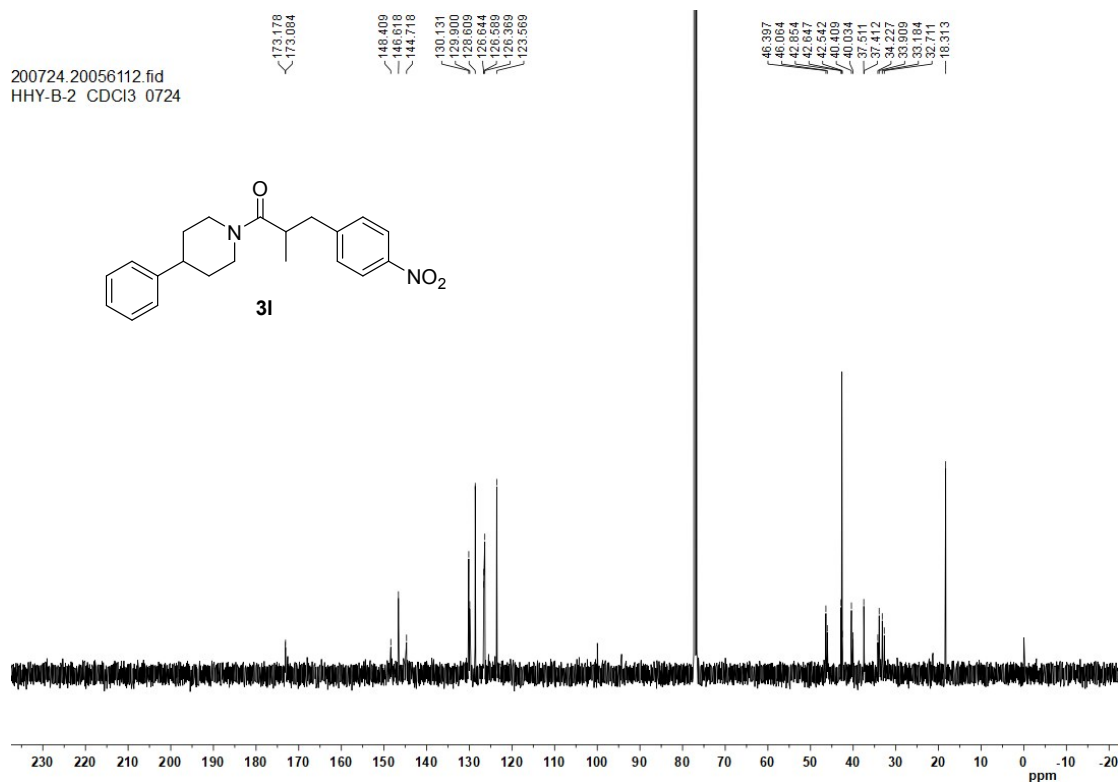

8.153  
8.137  
7.370  
7.354  
7.339  
4.444  
4.417  
4.368  
3.767  
3.759  
3.751  
3.740  
3.732  
3.723  
3.699  
3.686  
3.186  
3.167  
3.162  
3.142  
3.056  
3.043  
3.014  
3.001  
2.988  
2.940  
2.918  
2.895  
2.876  
2.776  
2.764  
2.749  
2.737  
2.707  
2.684  
2.668  
2.610  
2.593  
2.503  
2.484  
2.484  
2.472  
2.462  
2.440  
2.440  
1.876  
1.857  
1.814  
1.782  
1.774  
1.672  
1.655  
1.651  
1.644  
1.623  
1.602  
1.596  
1.586  
1.573  
1.398  
1.390  
1.374  
1.368  
1.348  
1.326  
1.318  
1.303  
1.200  
1.186

200715.20051421.fid  
HHY-B-27 CDCl3 0715

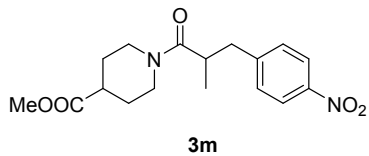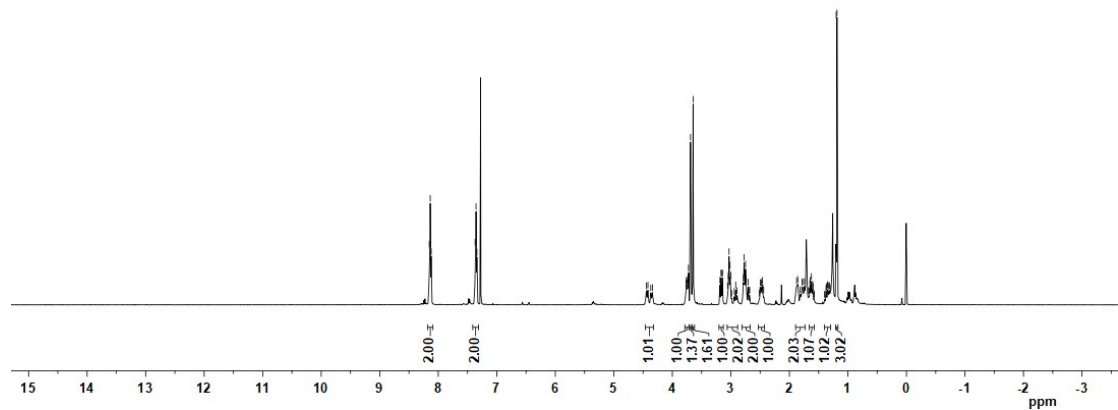

200715.20051422.fid  
HHY-B-27 CDCl3 0715

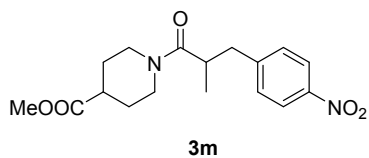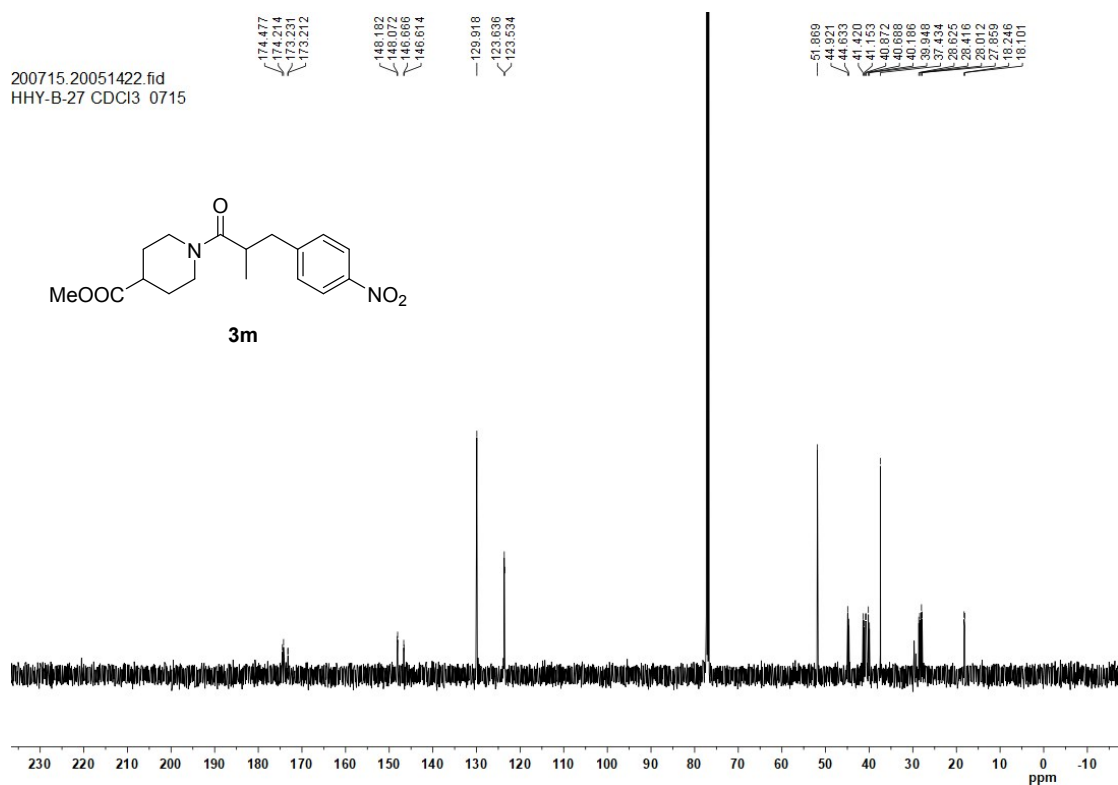



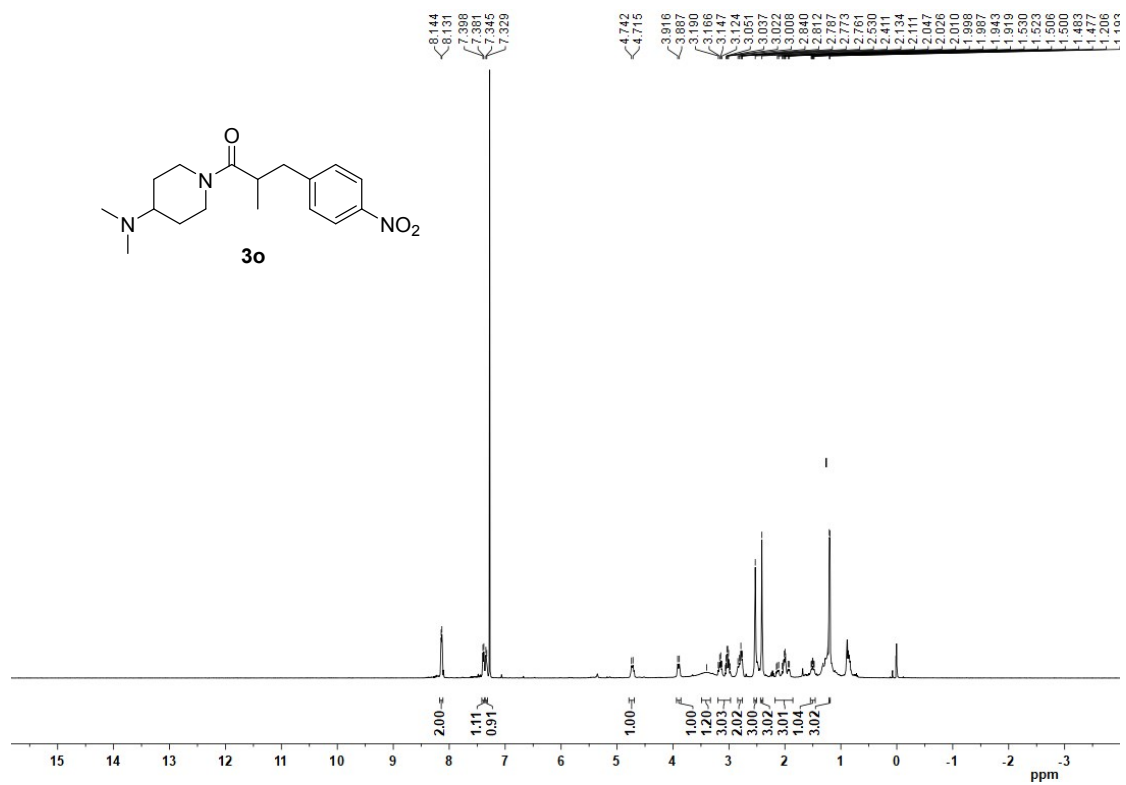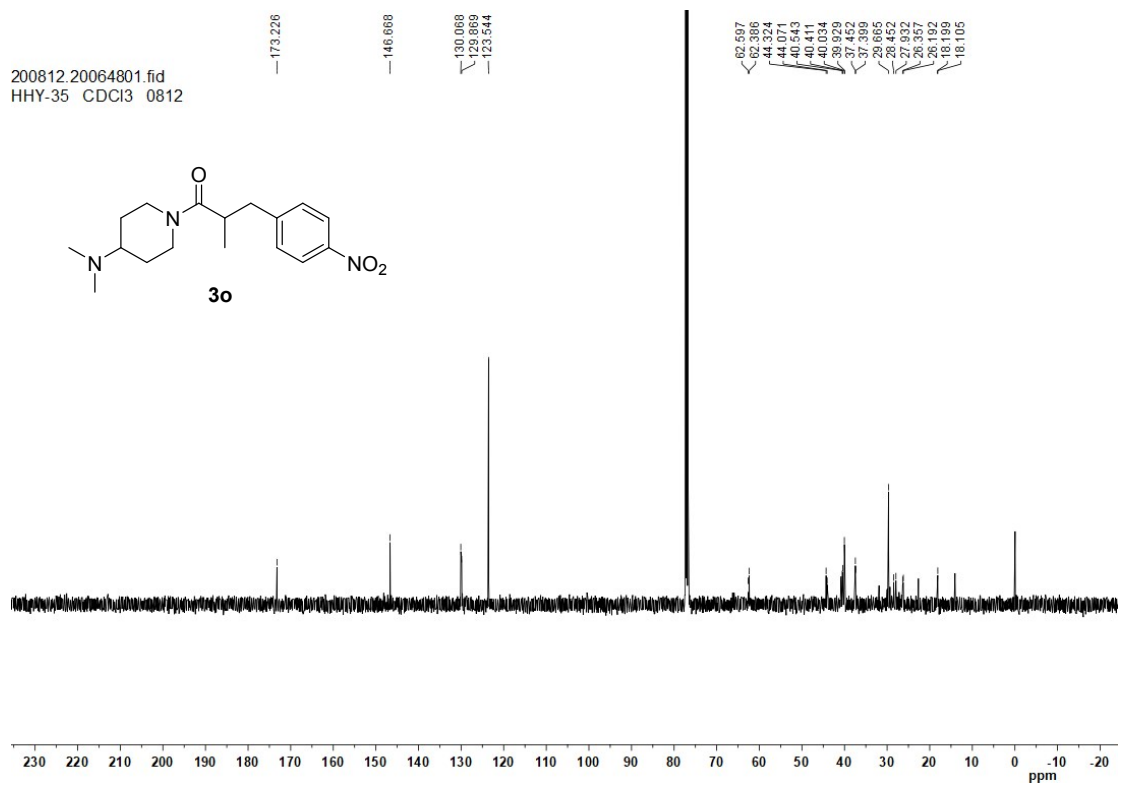

200628.20040173.fid  
HHY-B-7 CDCl3 0628

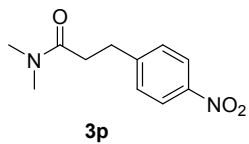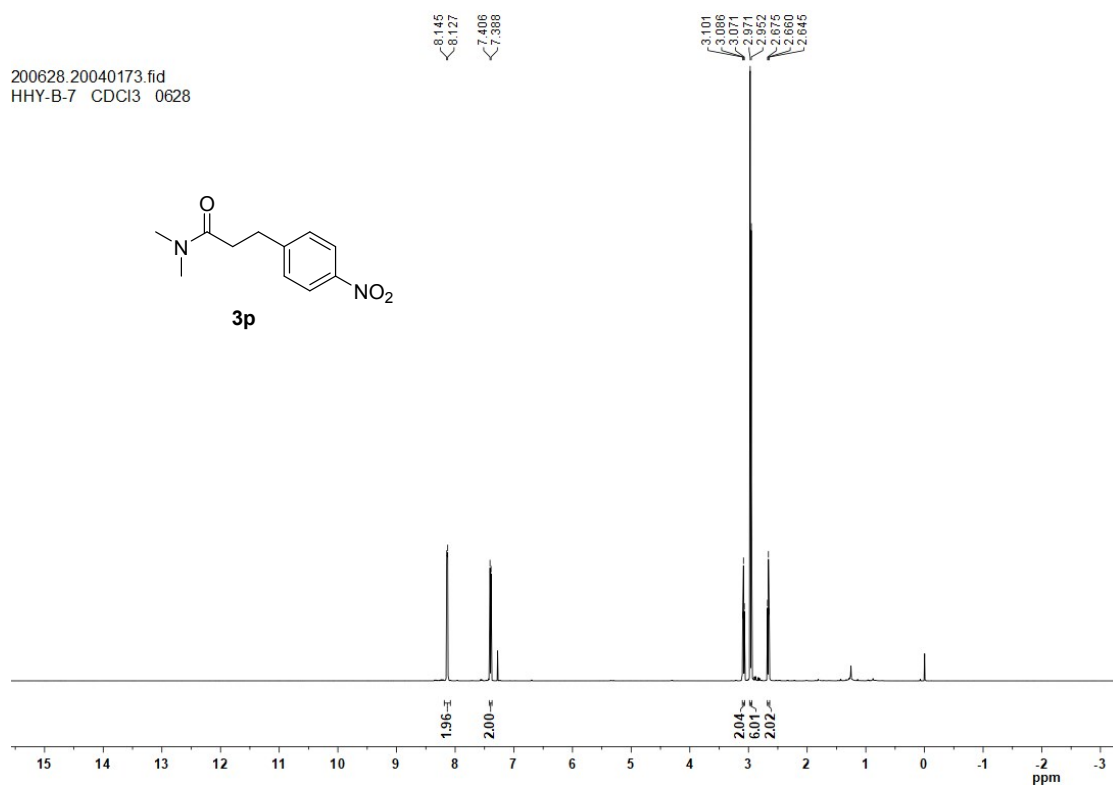

200628.20040174.fid  
HHY-B-7 CDCl3 0628

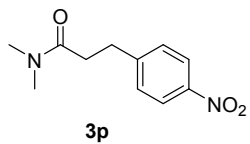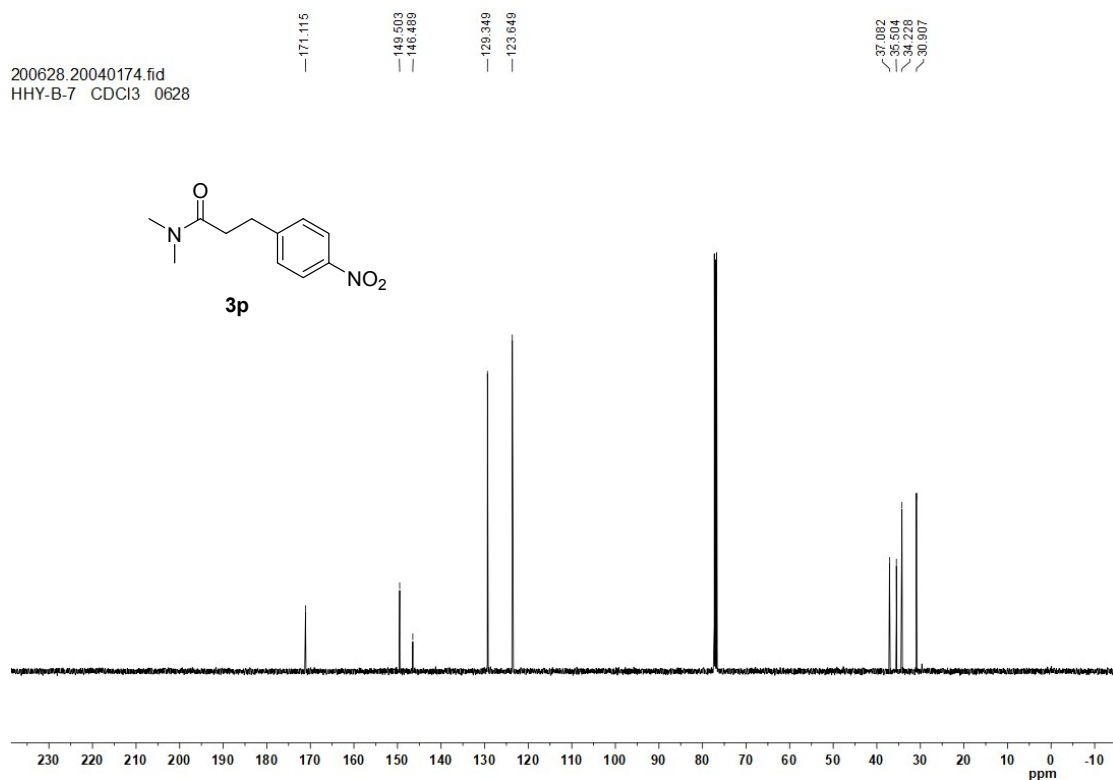

200511.200142615.fid  
HHY-14 CDCl3 0511

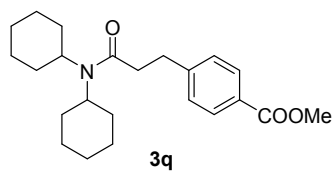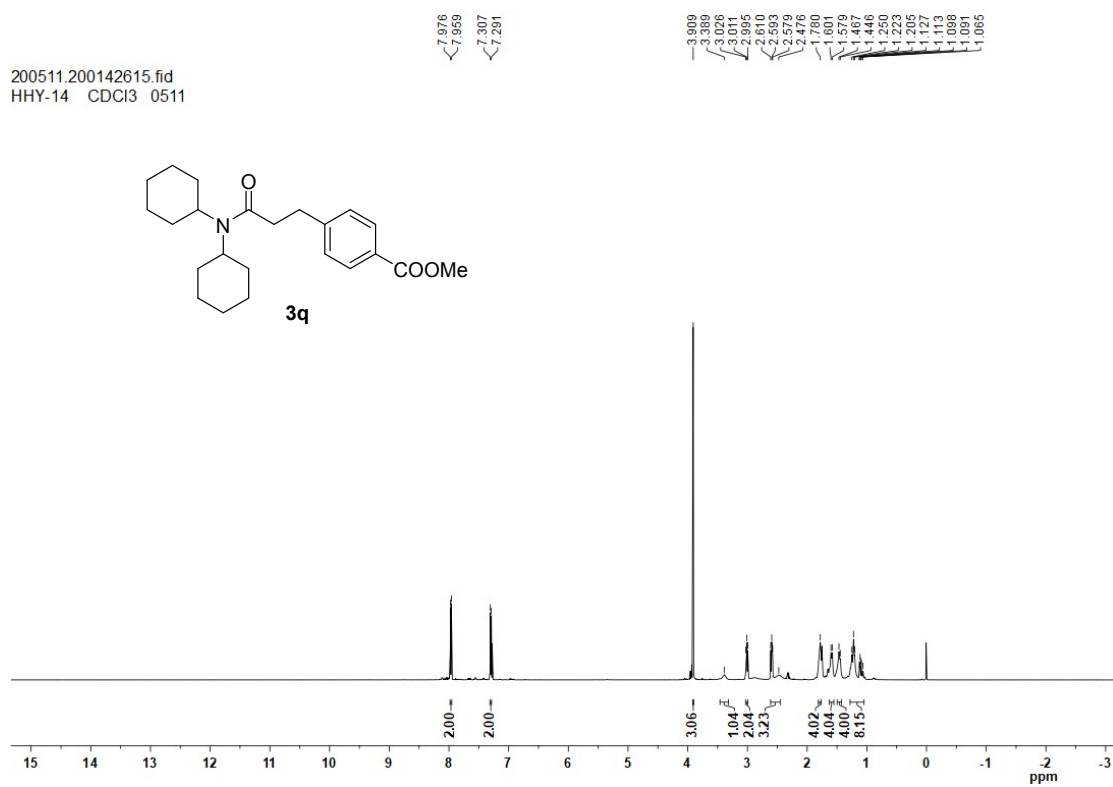

200511.200142616.fid  
HHY-14 CDCl3 0511

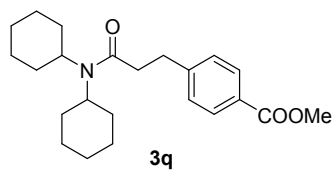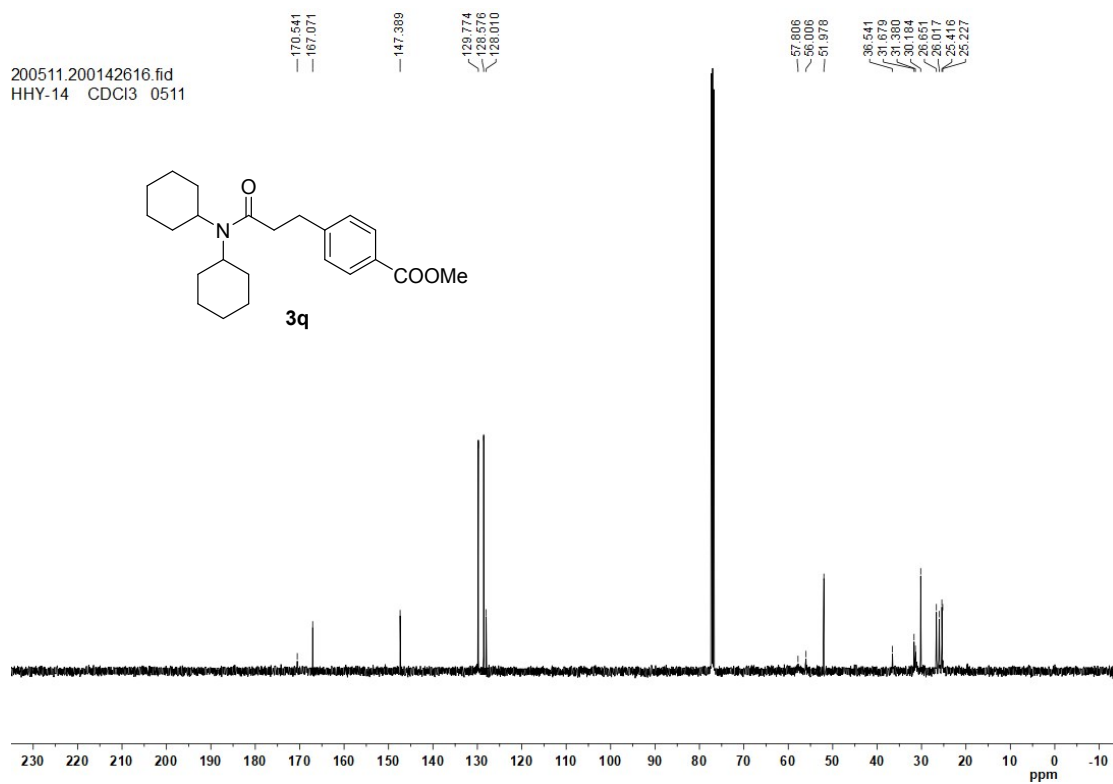

200601.20024924.fid  
HHY-28 CDCL3 0601

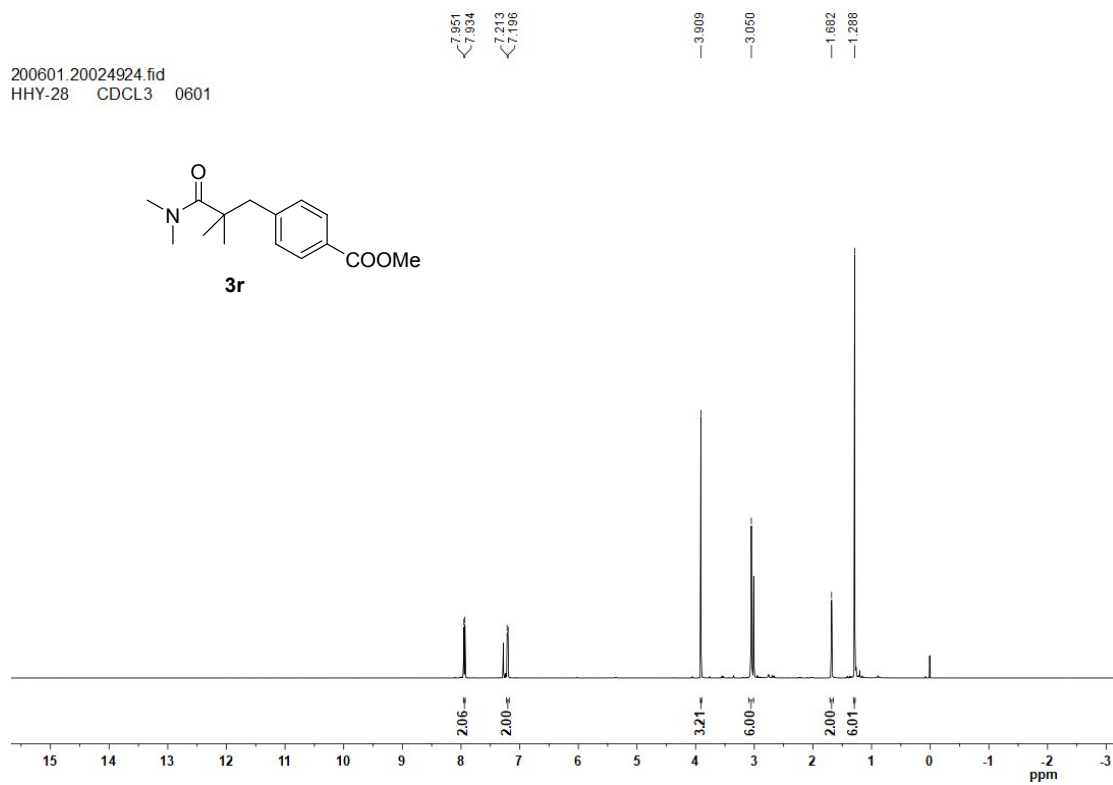

200612.20034541.fid  
HHY-28 CDCL3 0612

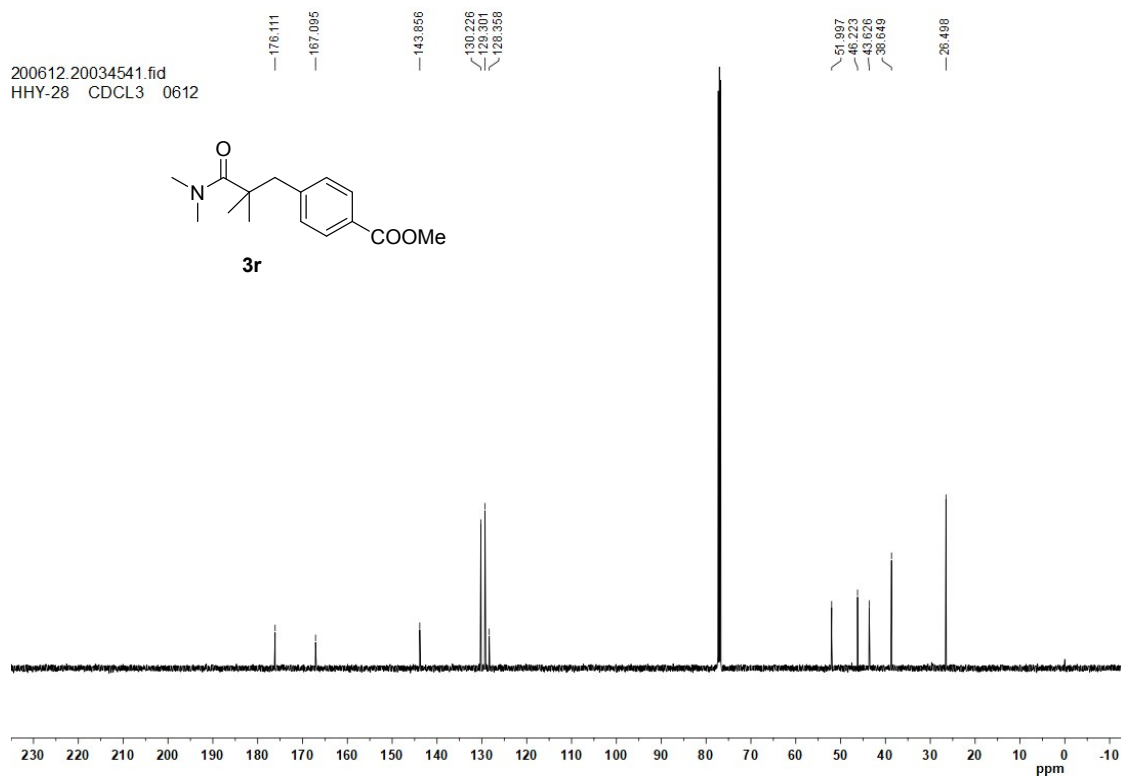

200113.200057614.fid  
HHY-7 CDCl3 0113

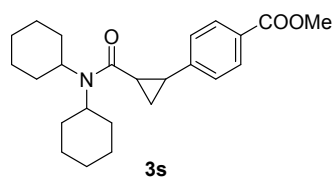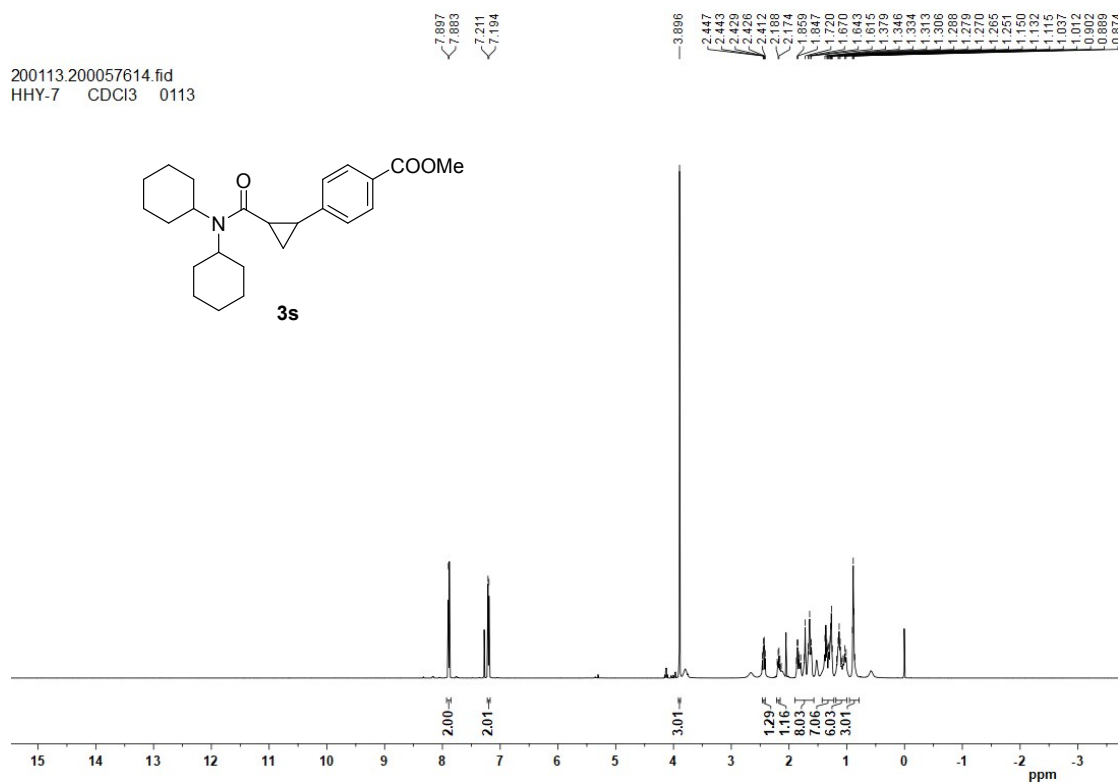

200113.200057613.fid  
HHY-7 CDCl3 0113

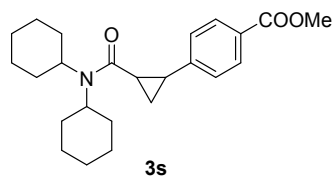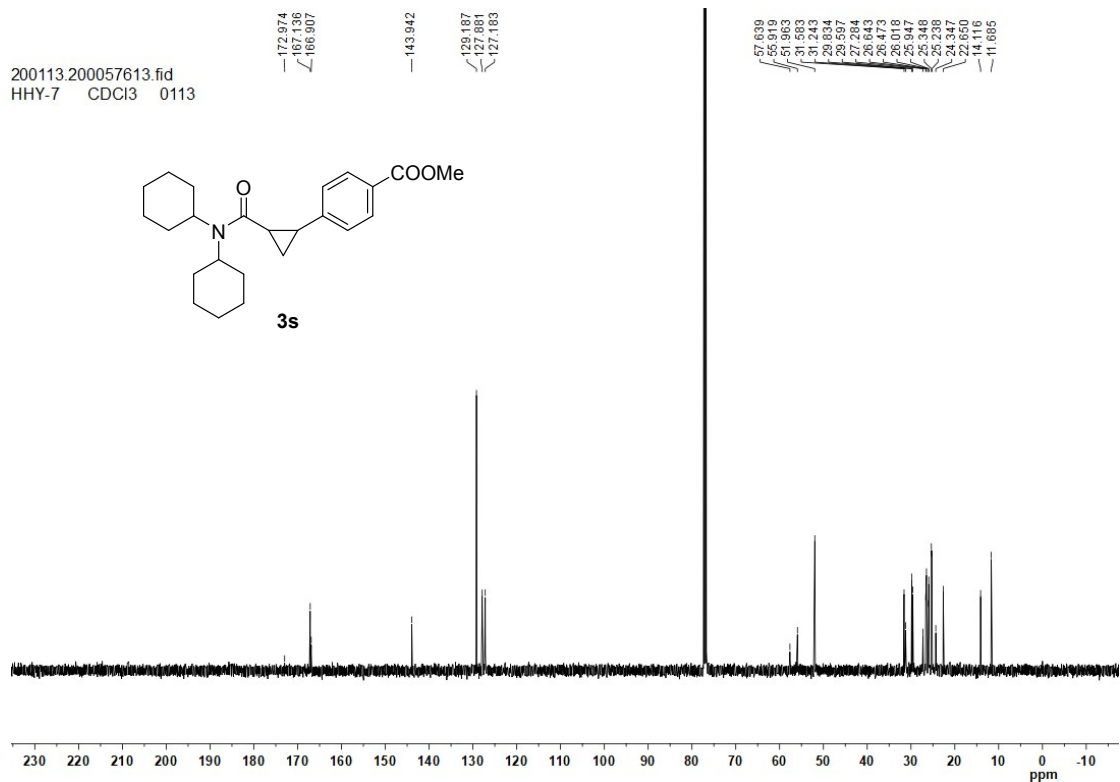



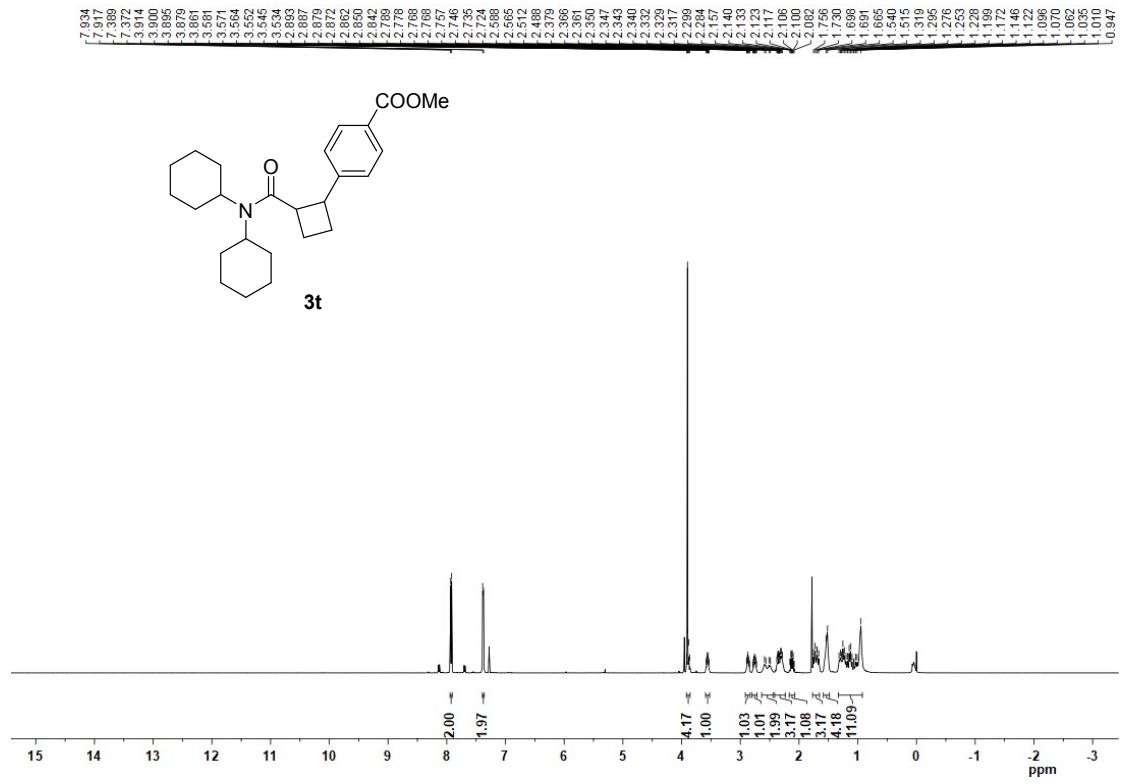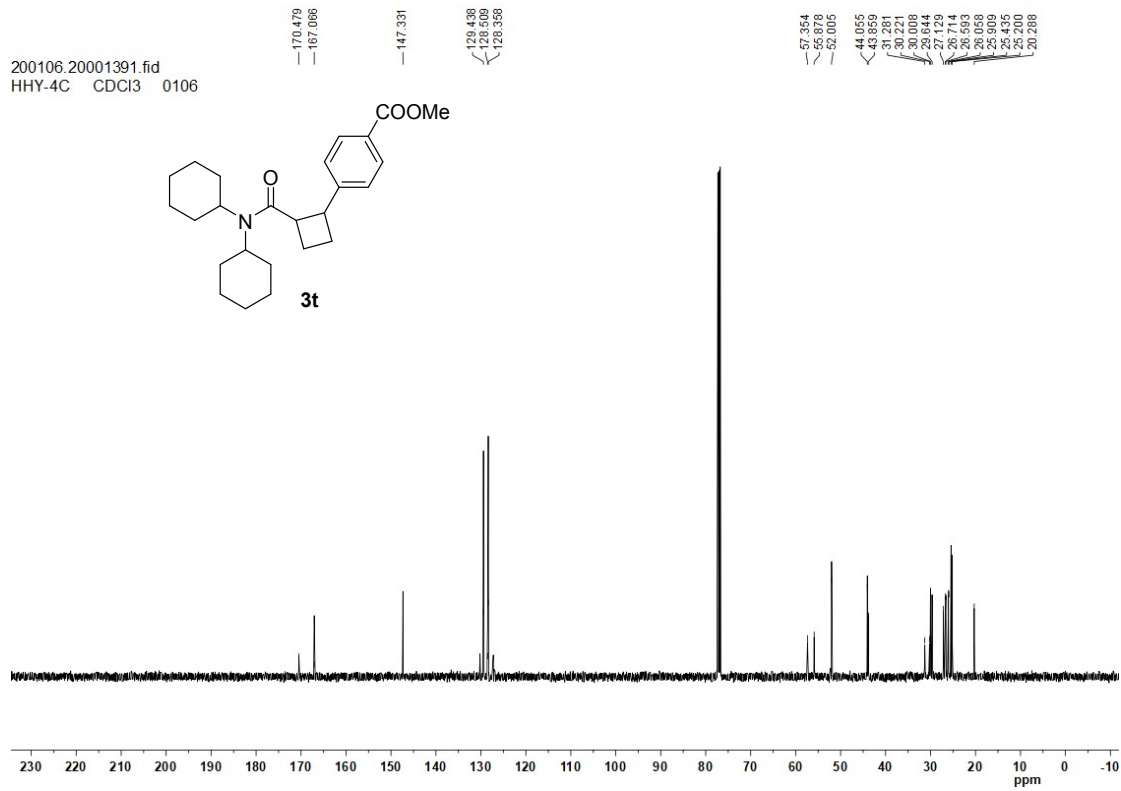

200601.20024925.fid  
HHY-29 CDCL3 0601

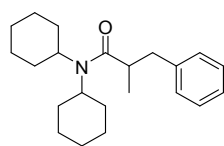

3u

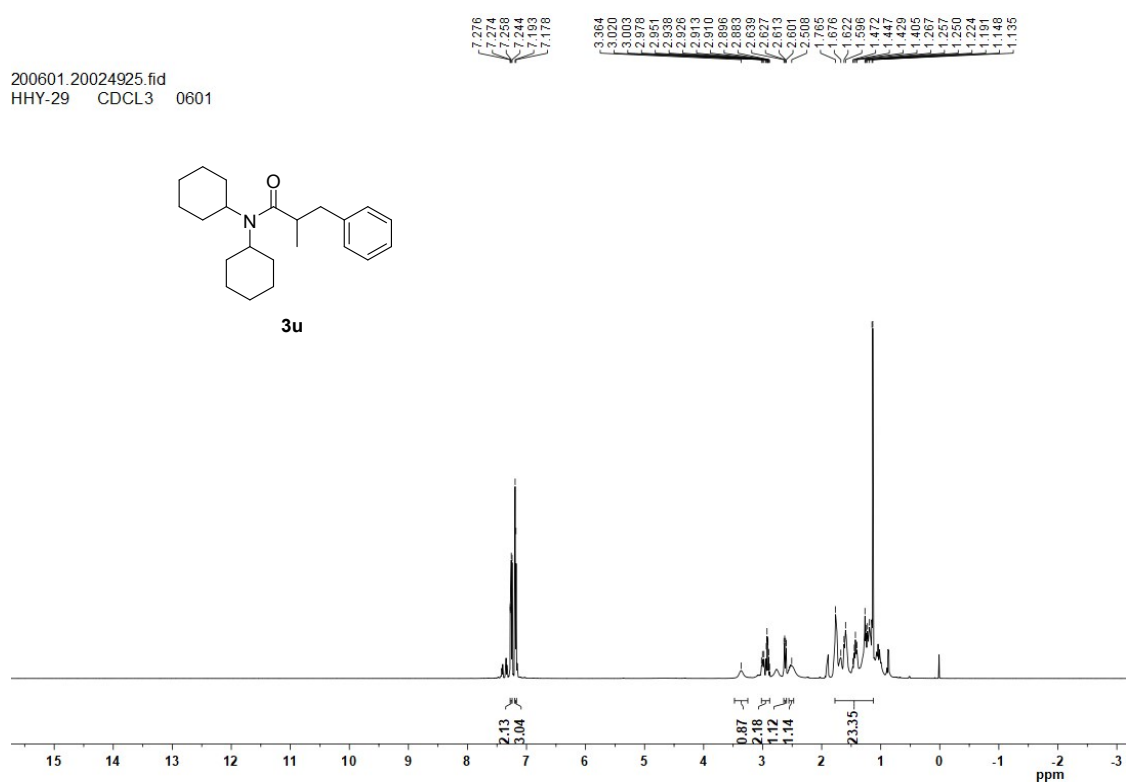

200612.20034542.fid  
HHY-29 CDCL3 0612

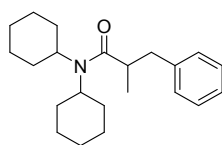

3u

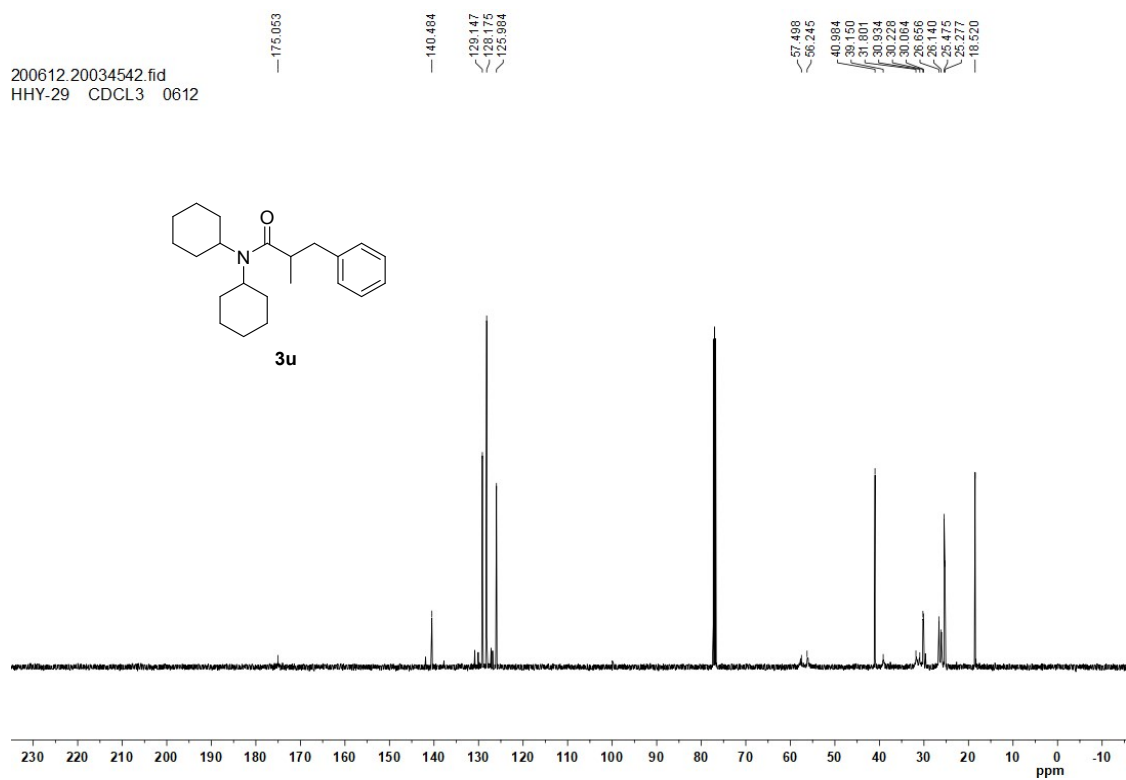

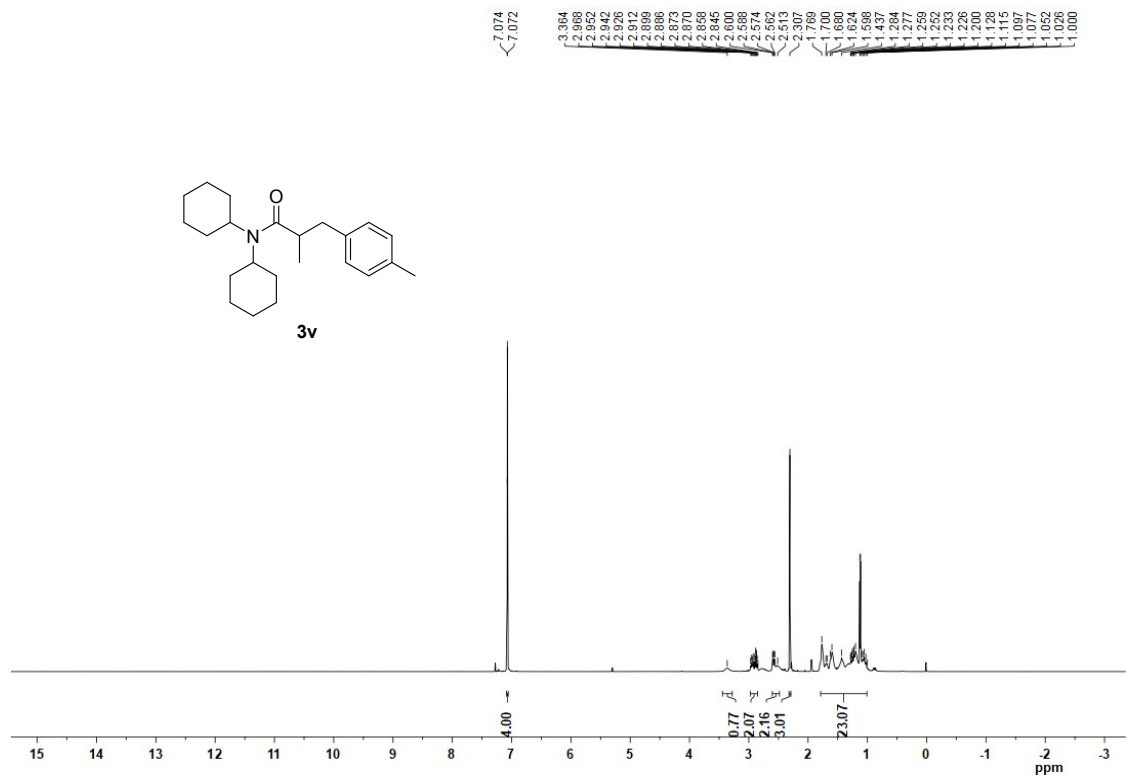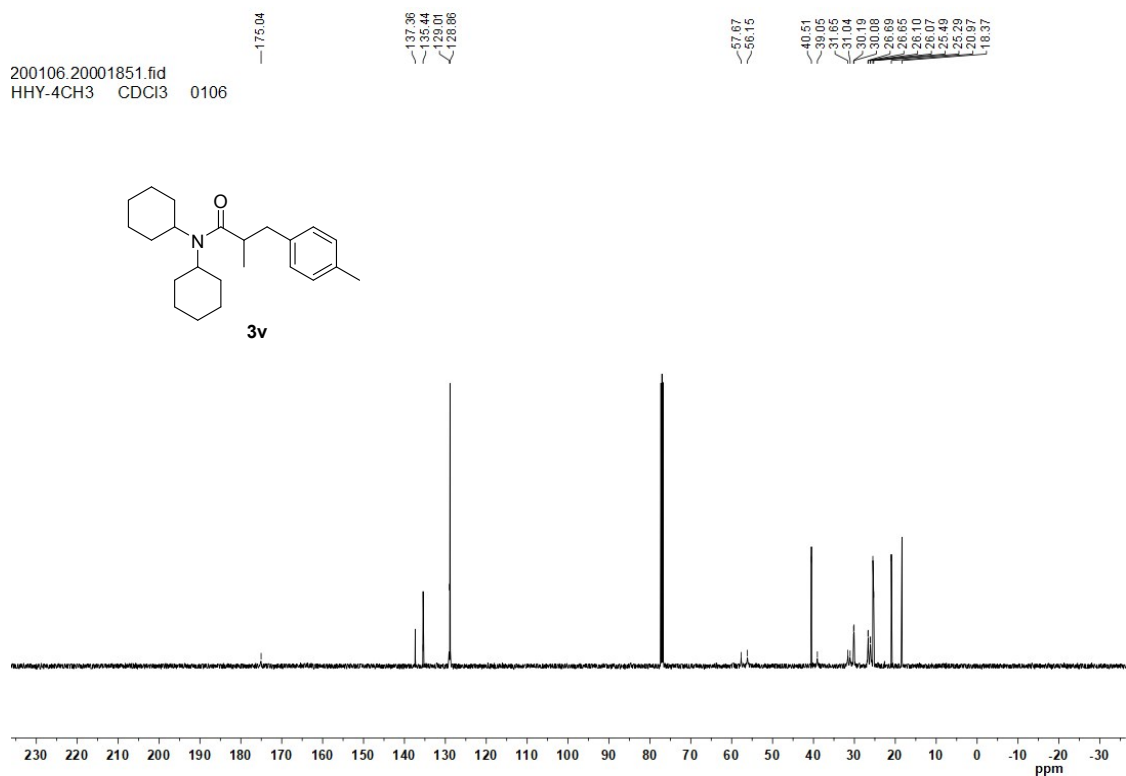

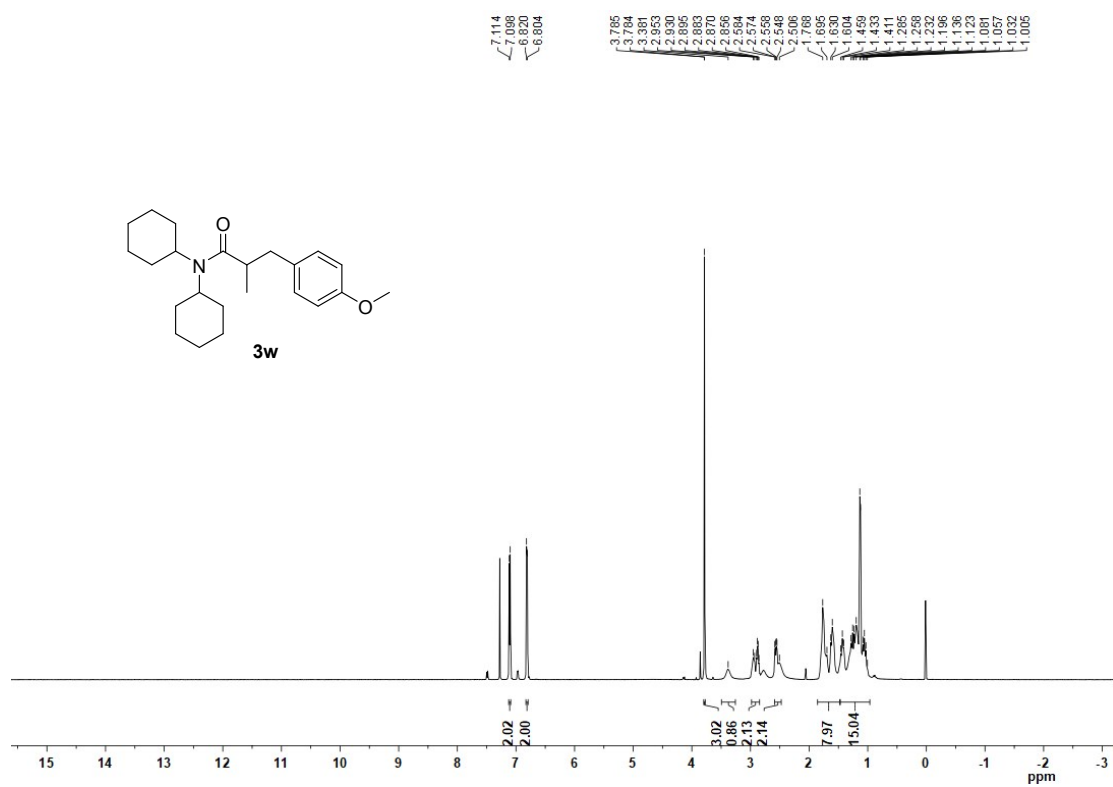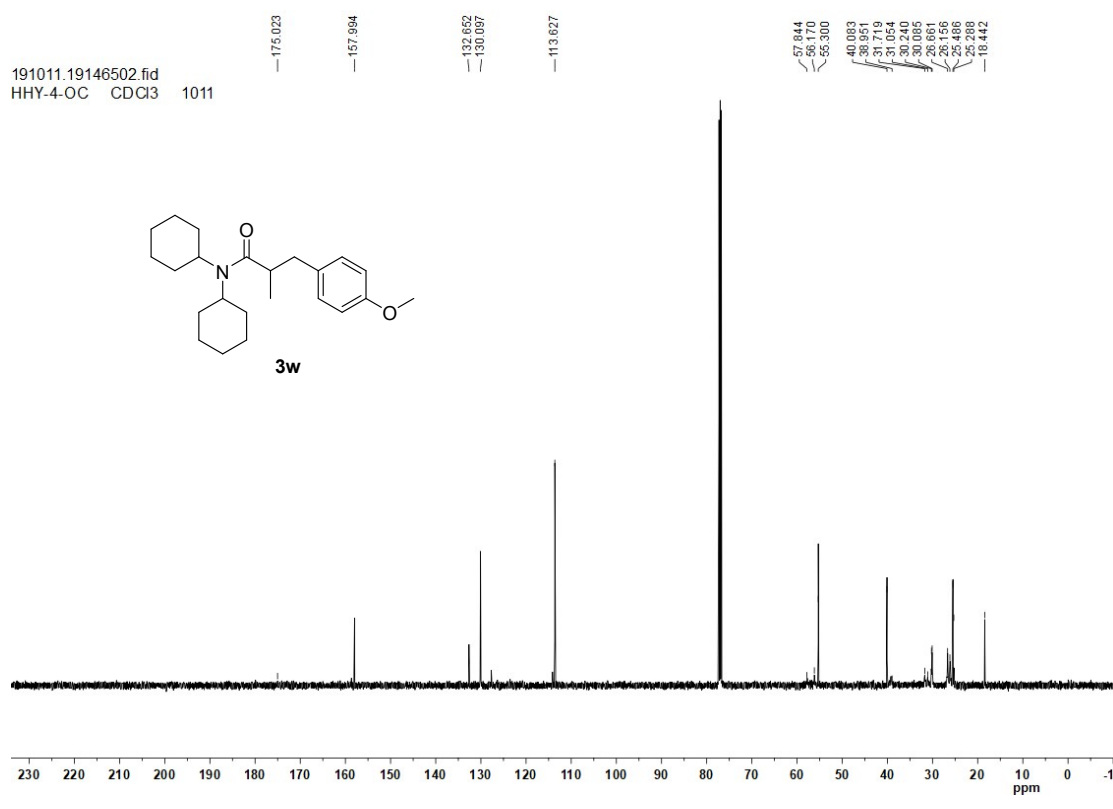

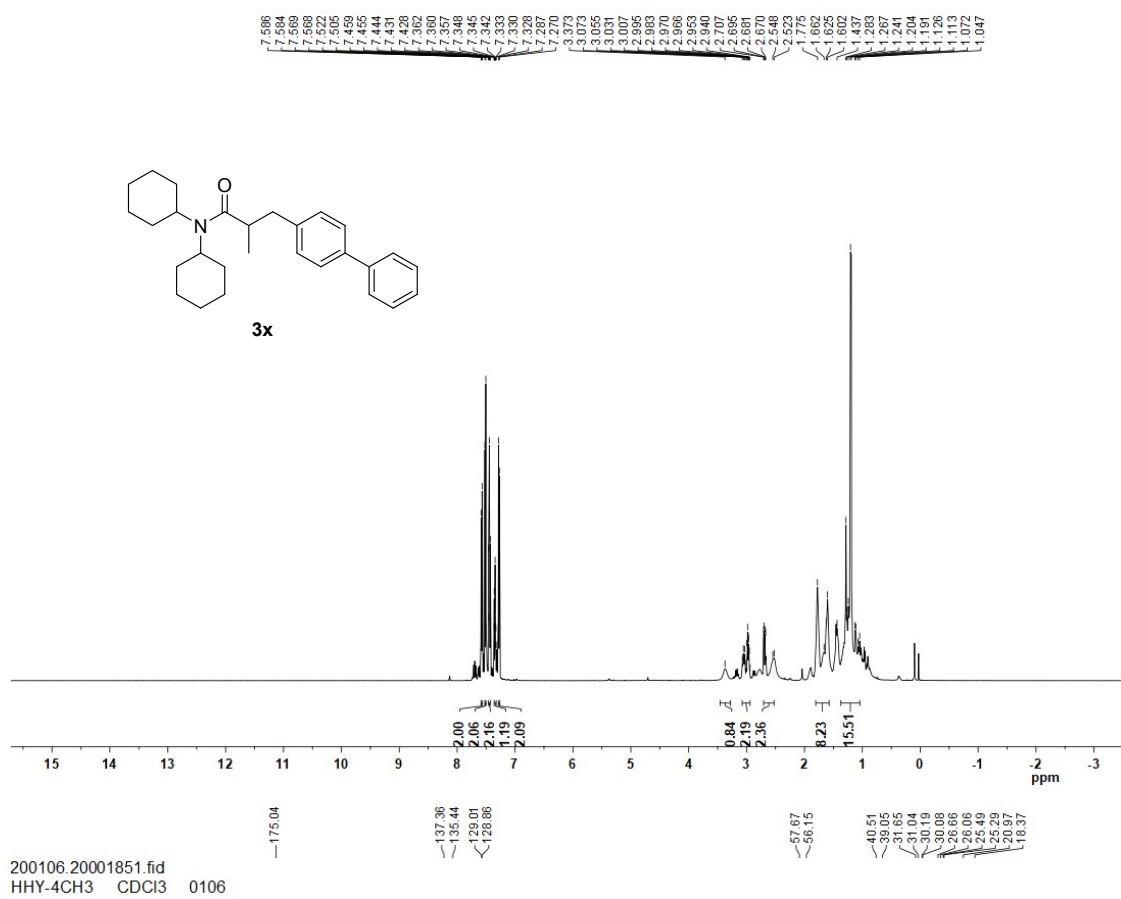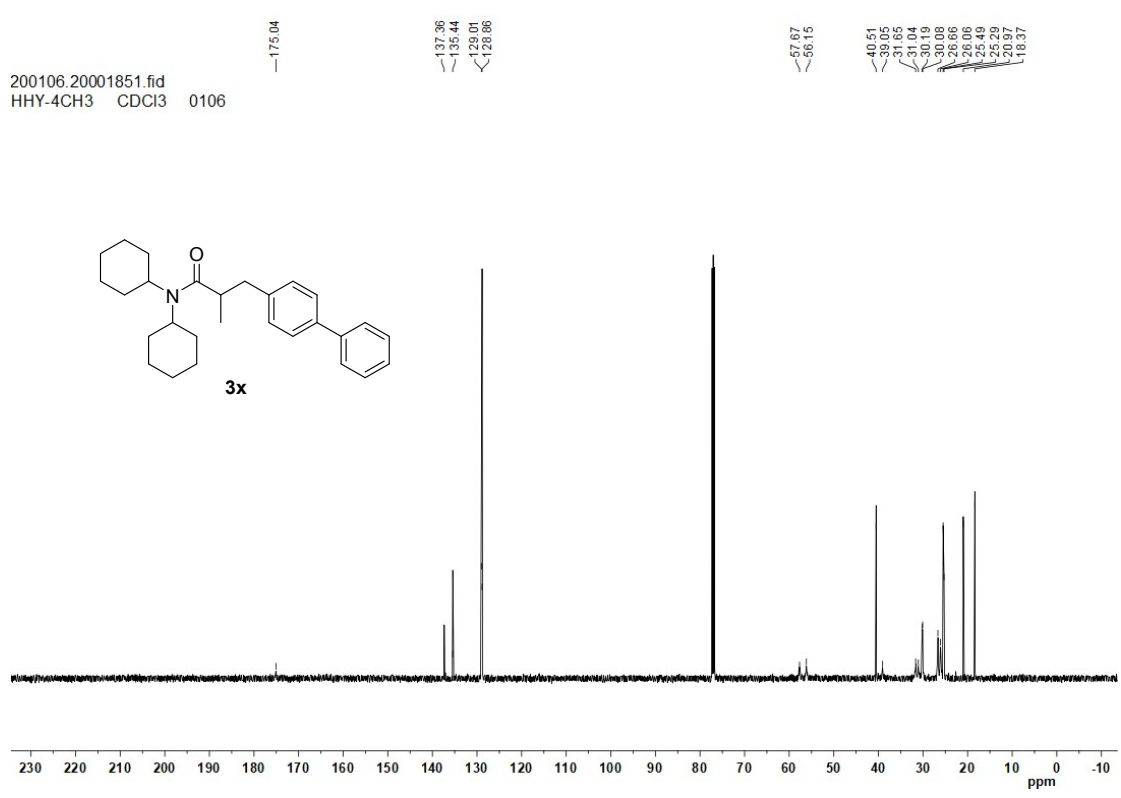

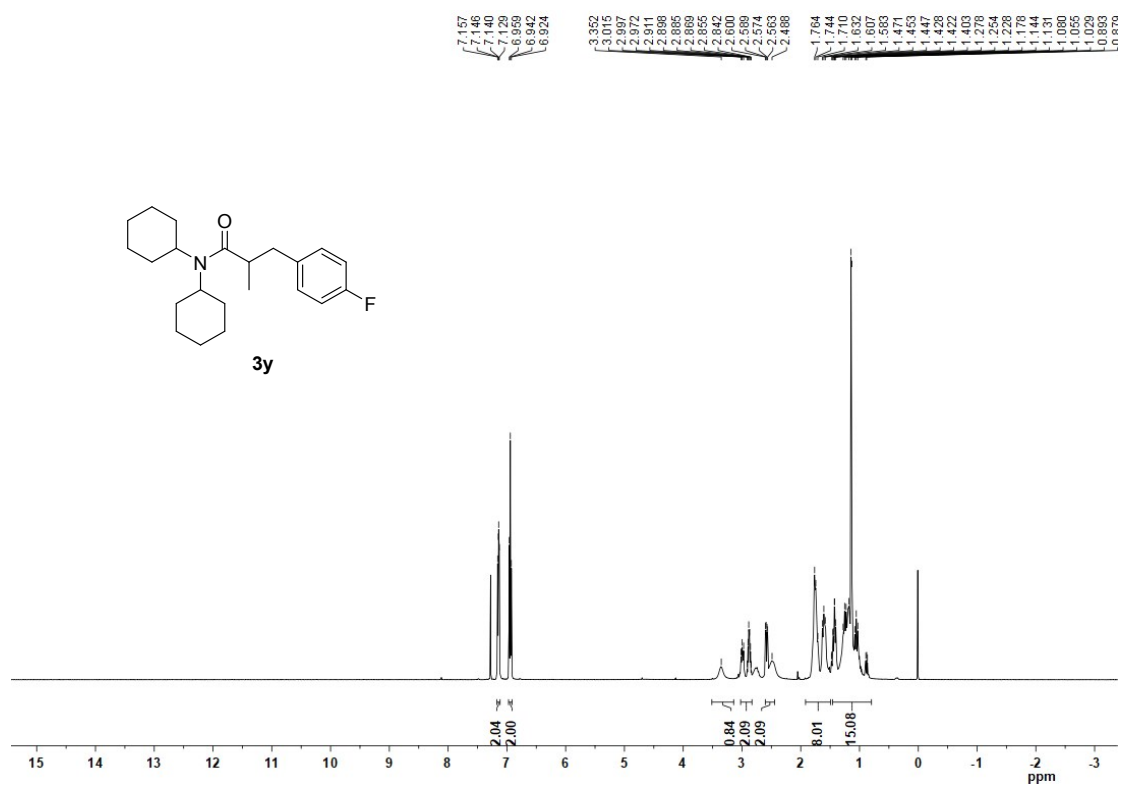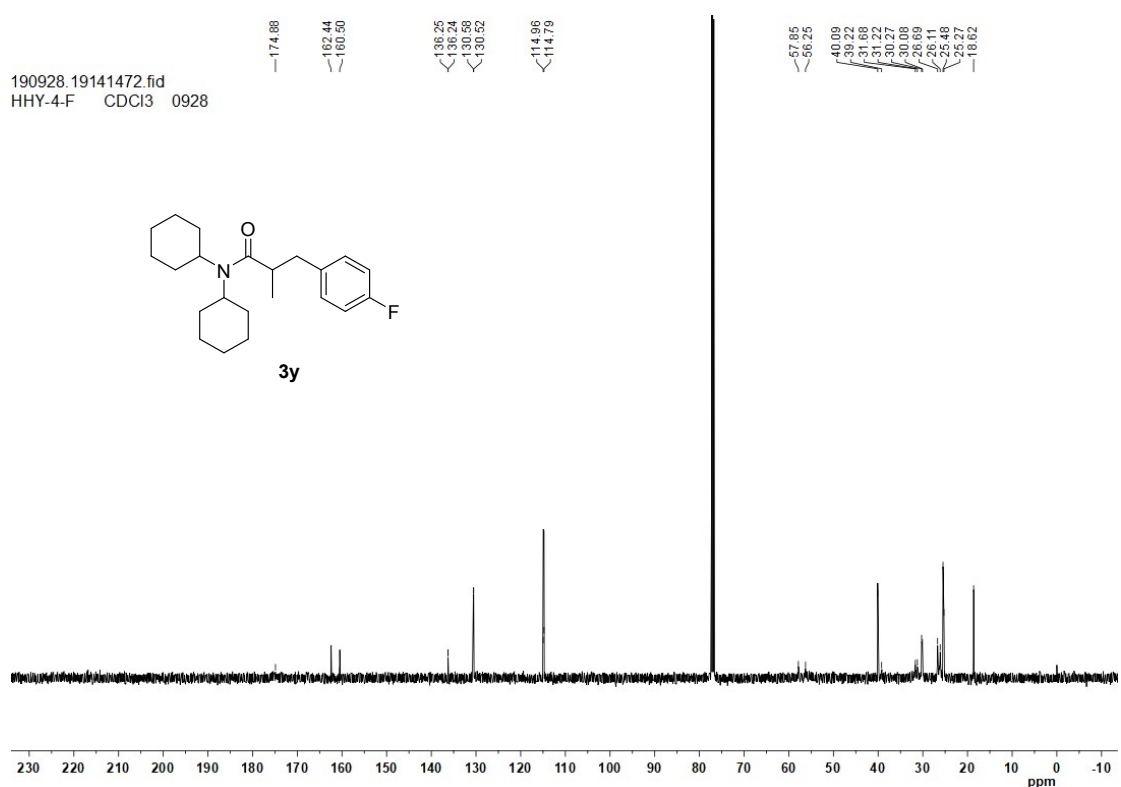

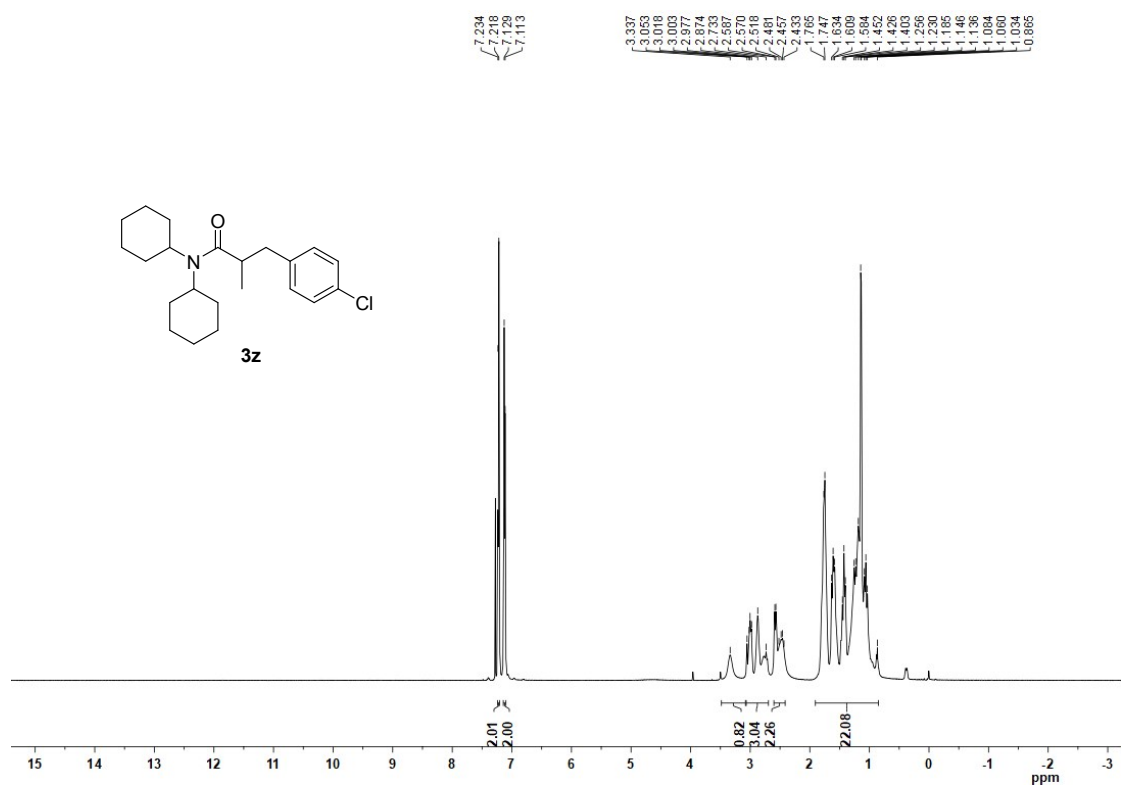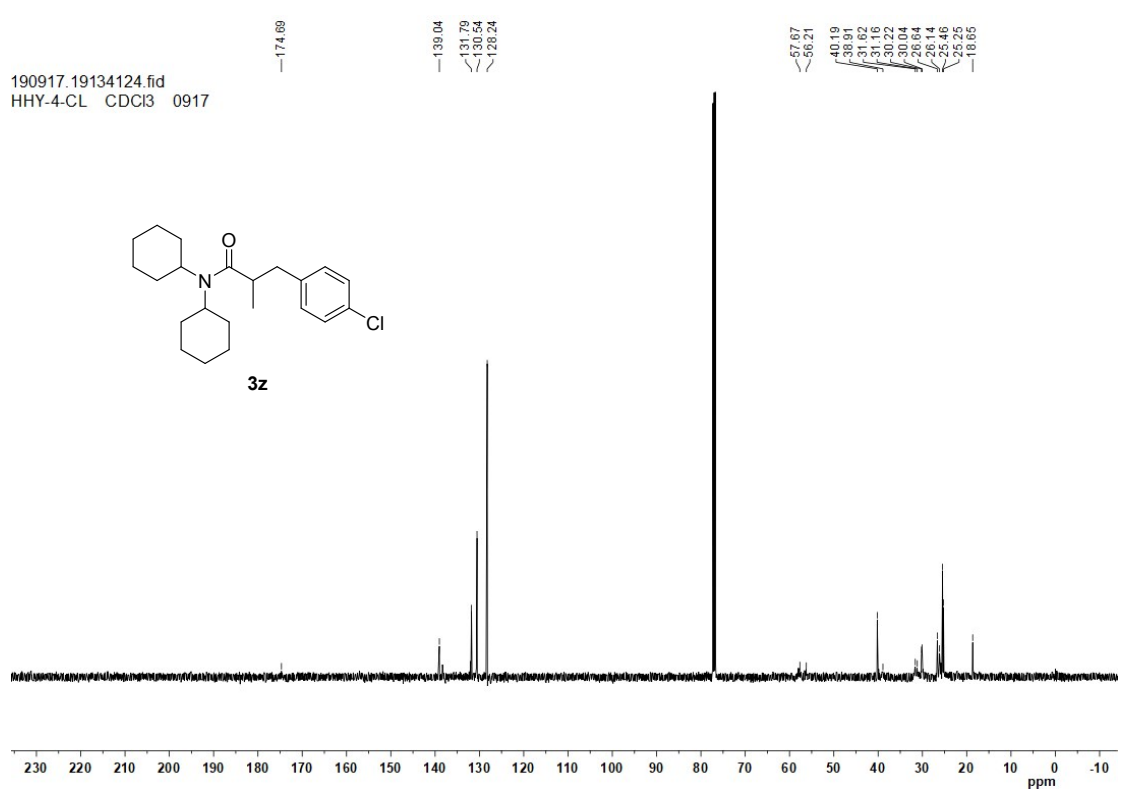

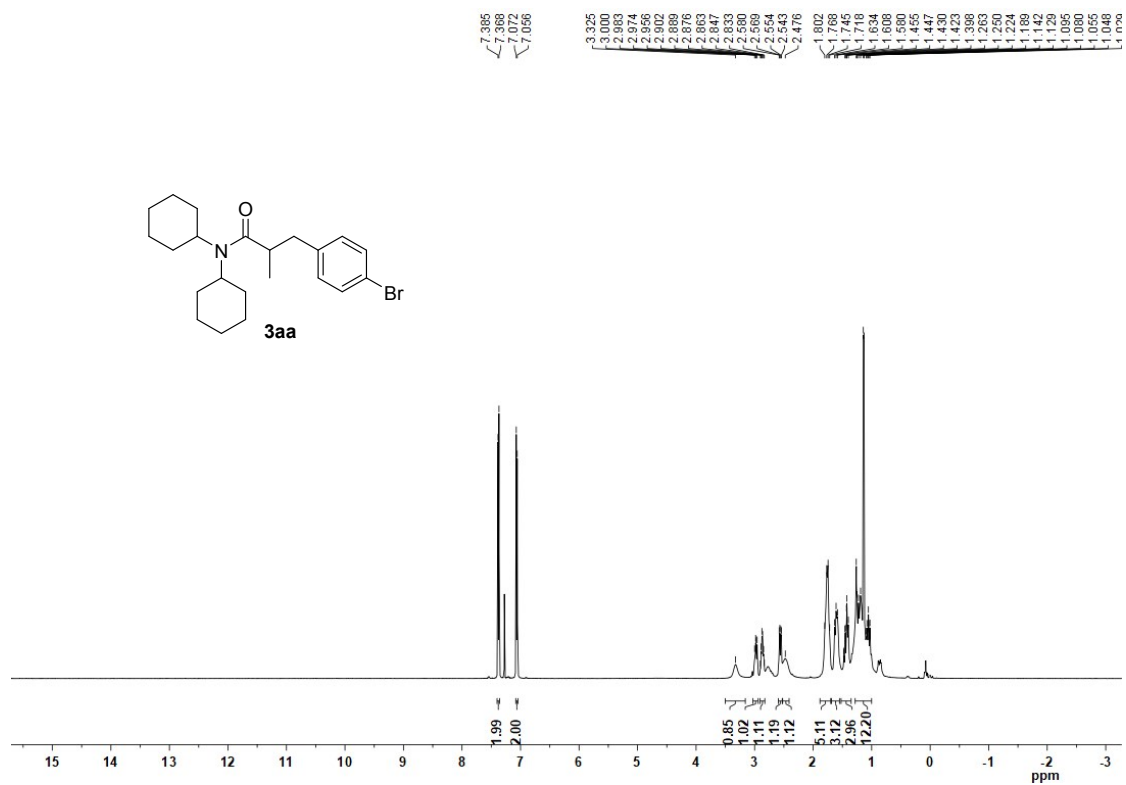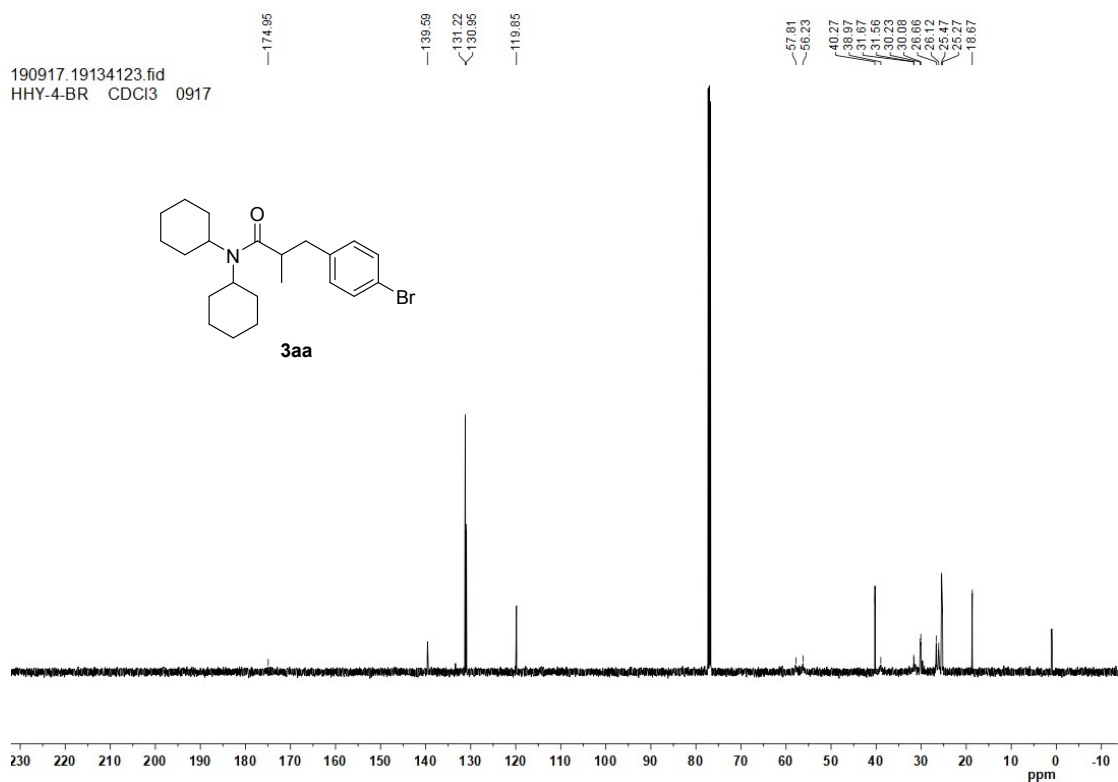



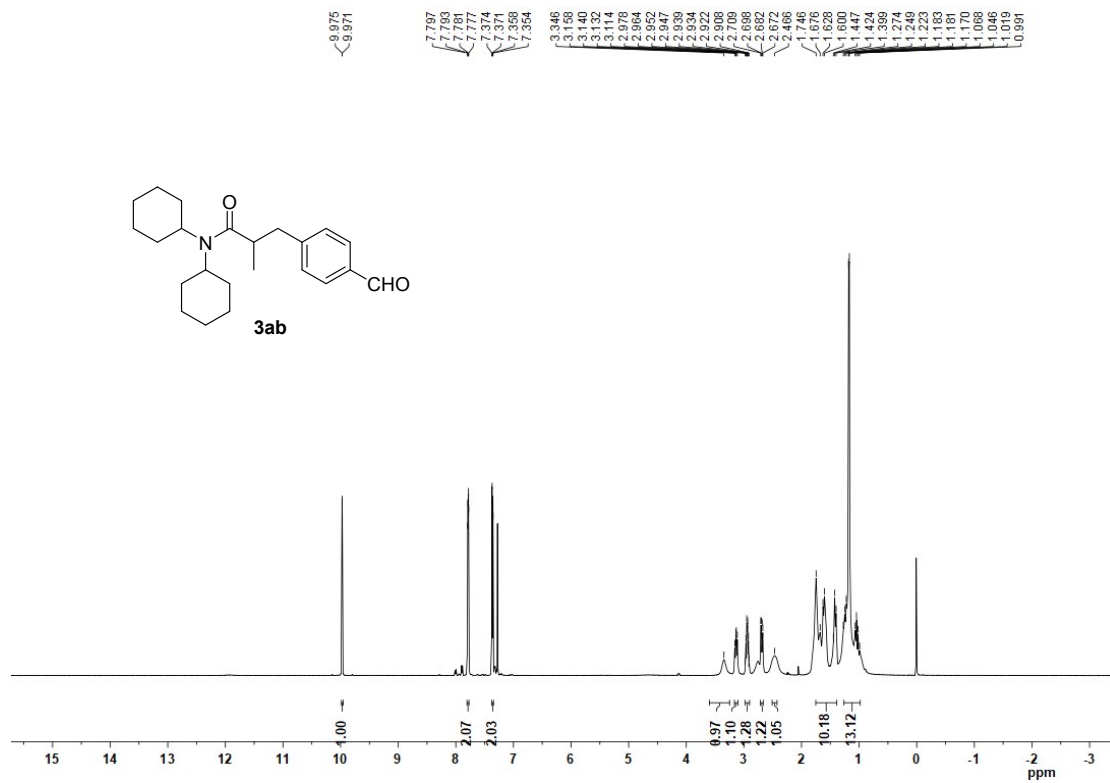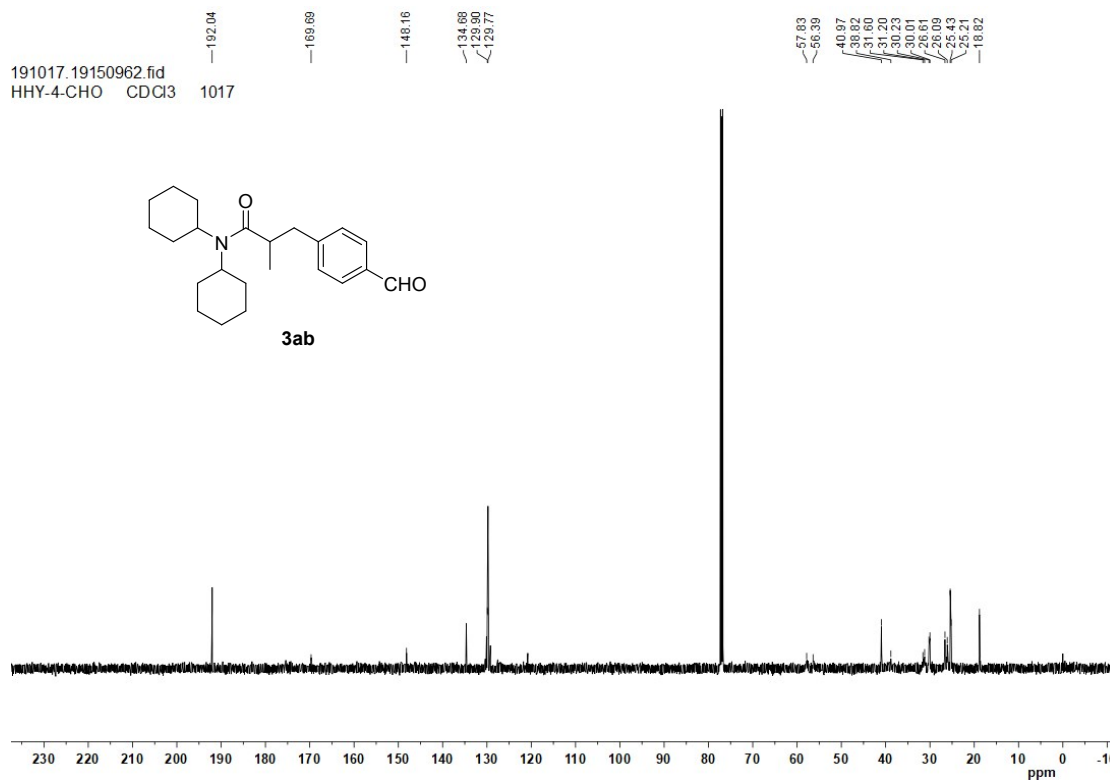

200106.20001372.fid  
HHY-CO CDCl3 0106

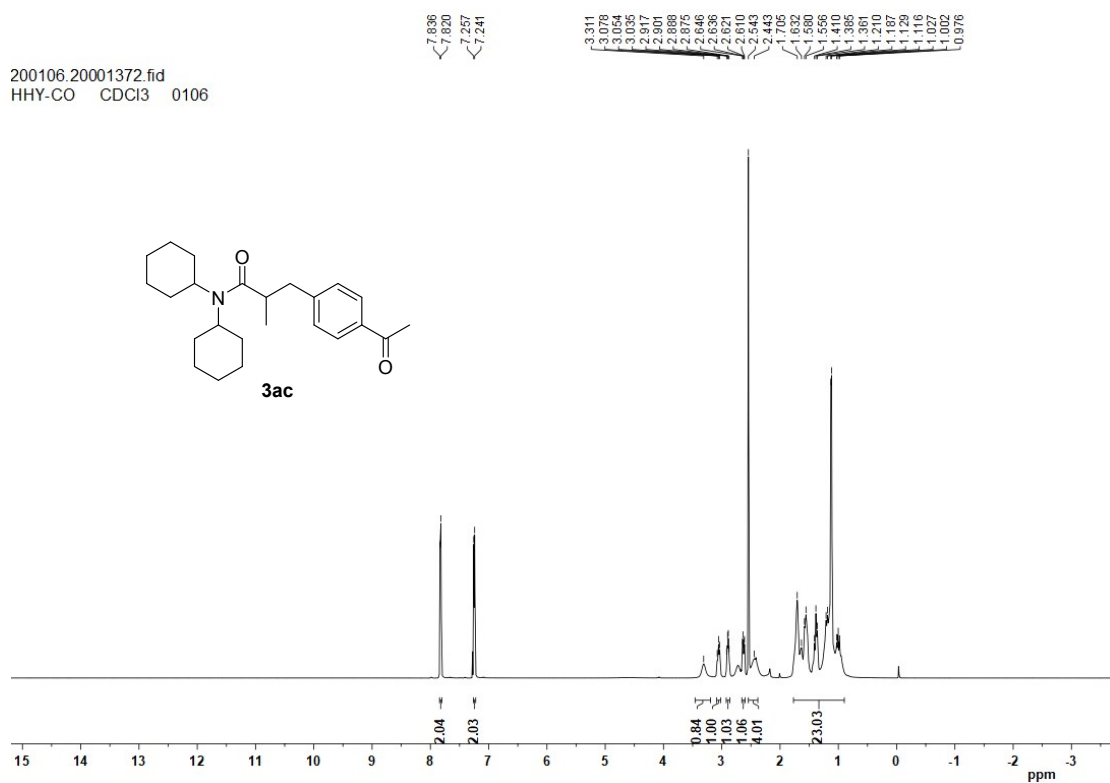

200106.20001392.fid  
HHY-CO CDCl3 0106

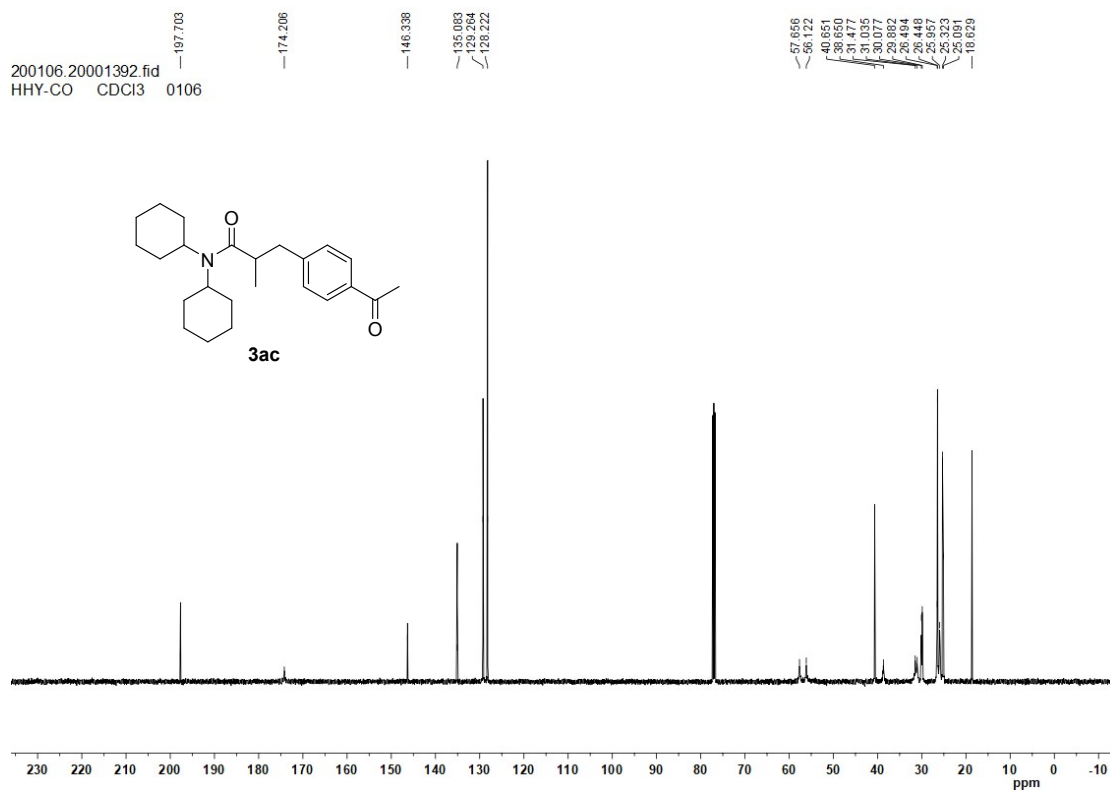

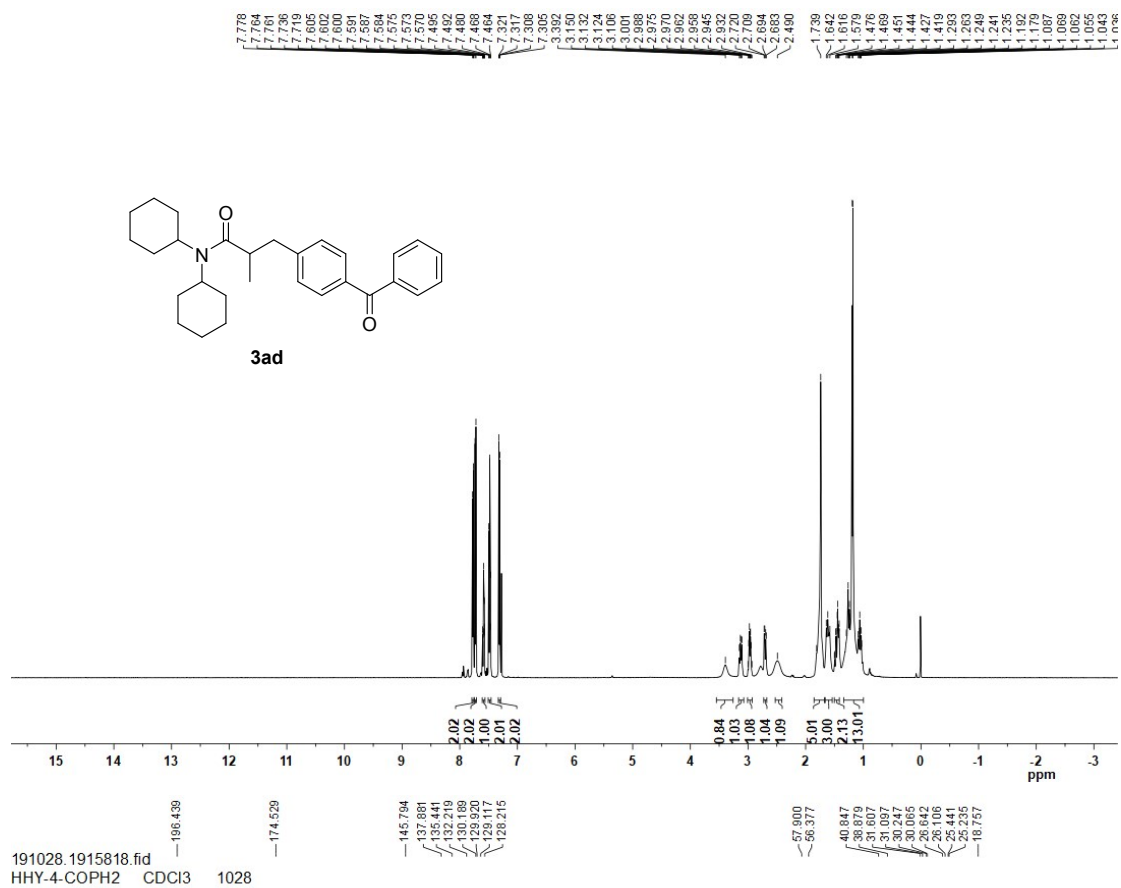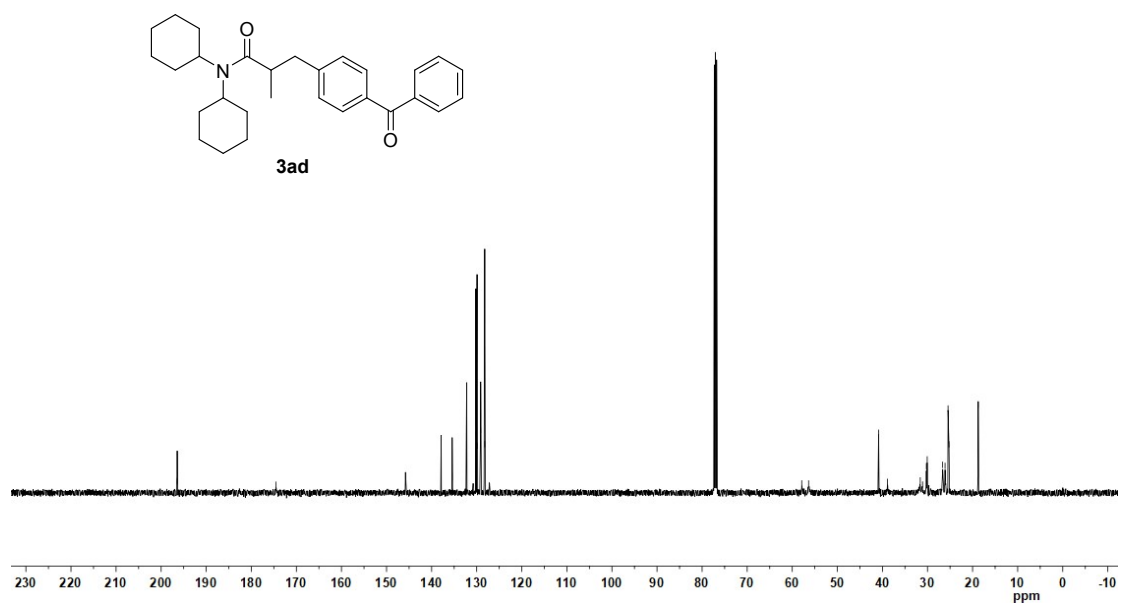

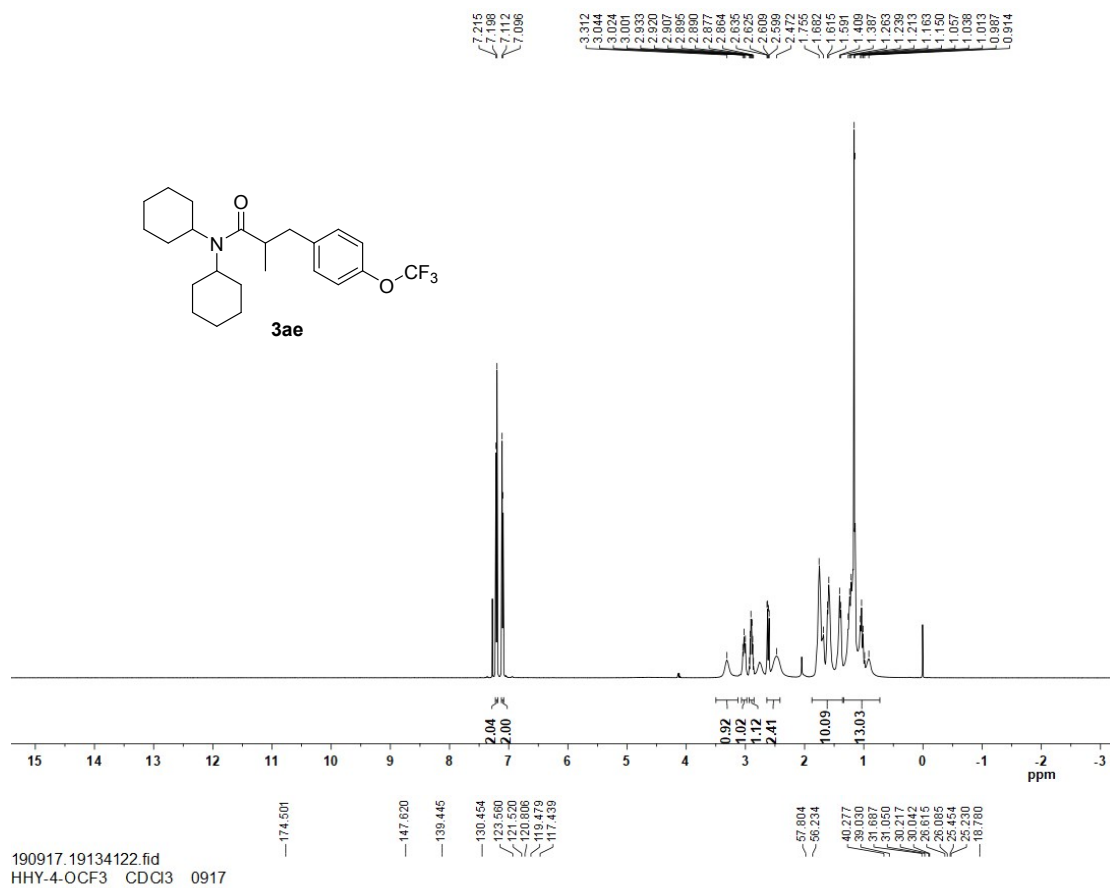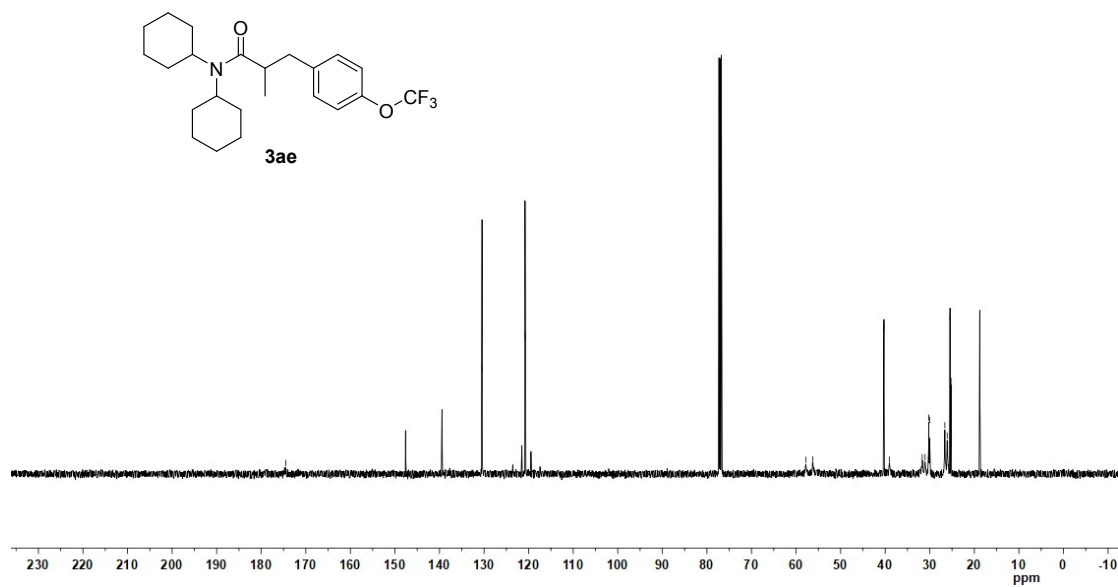

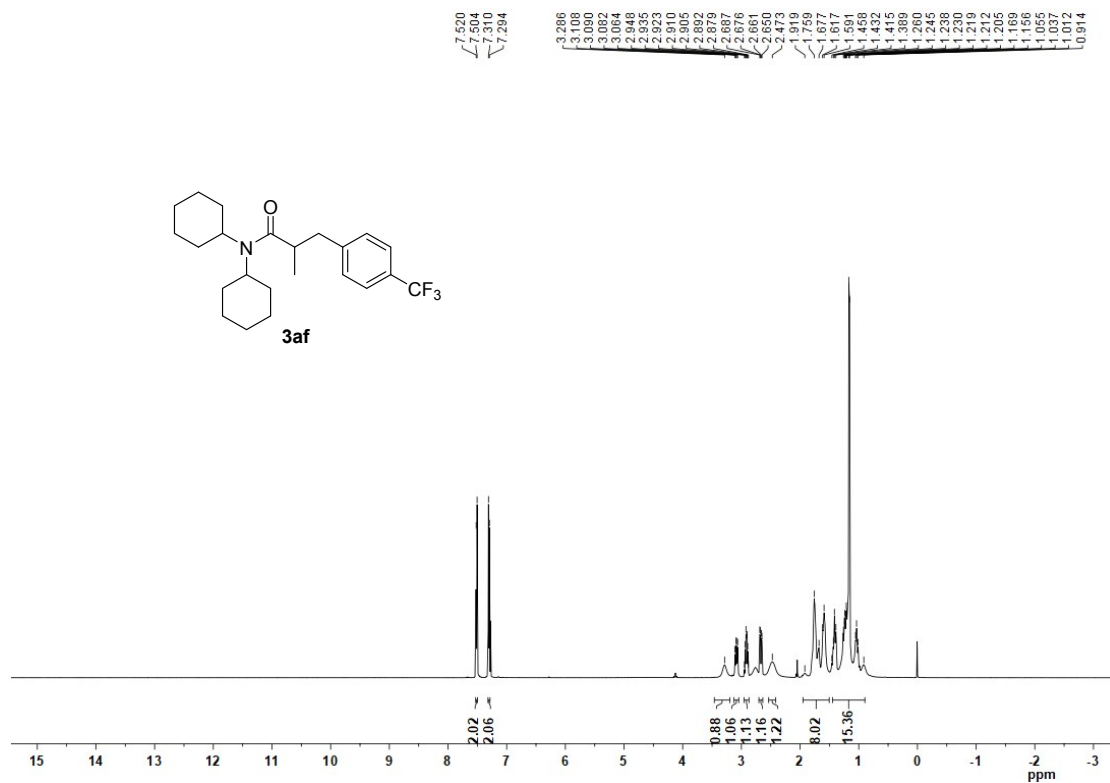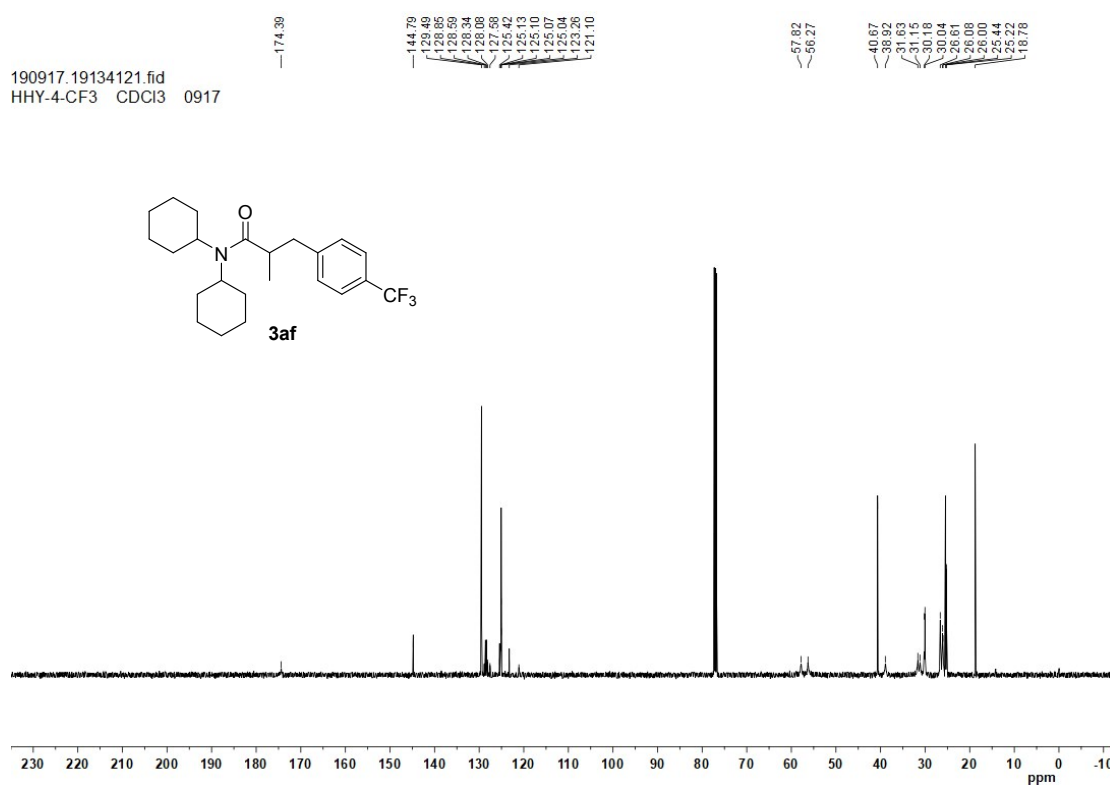

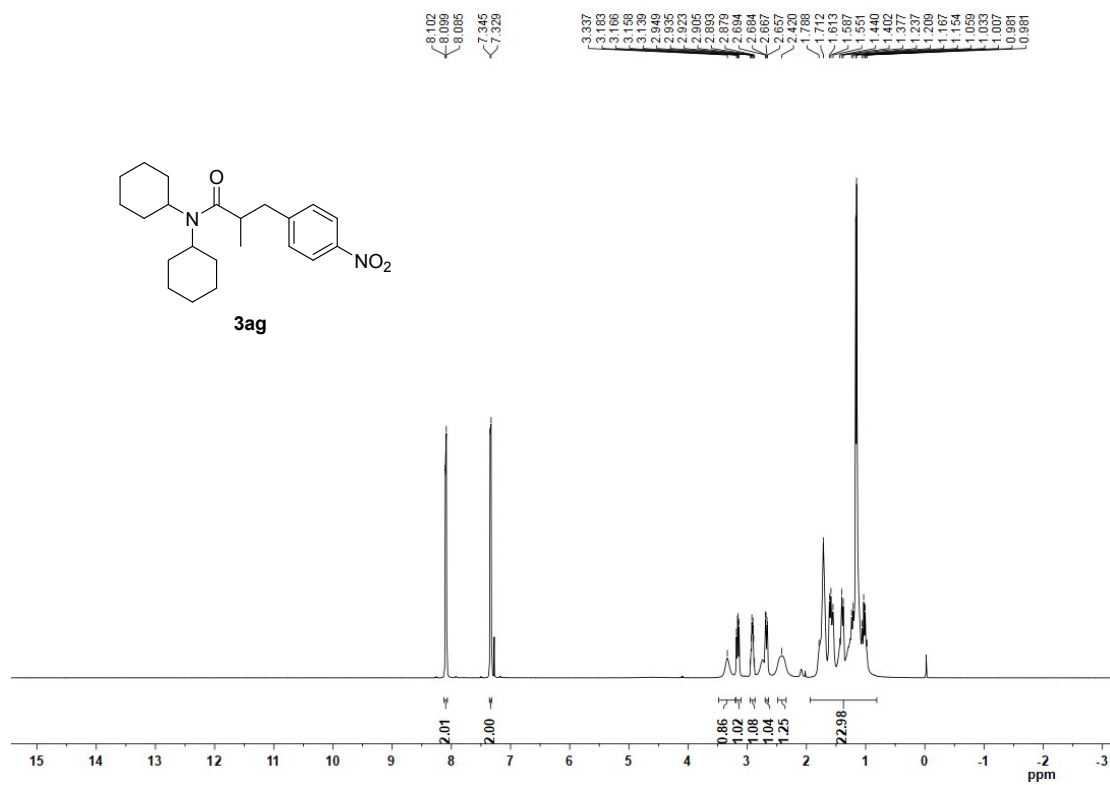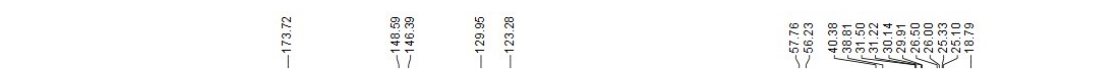

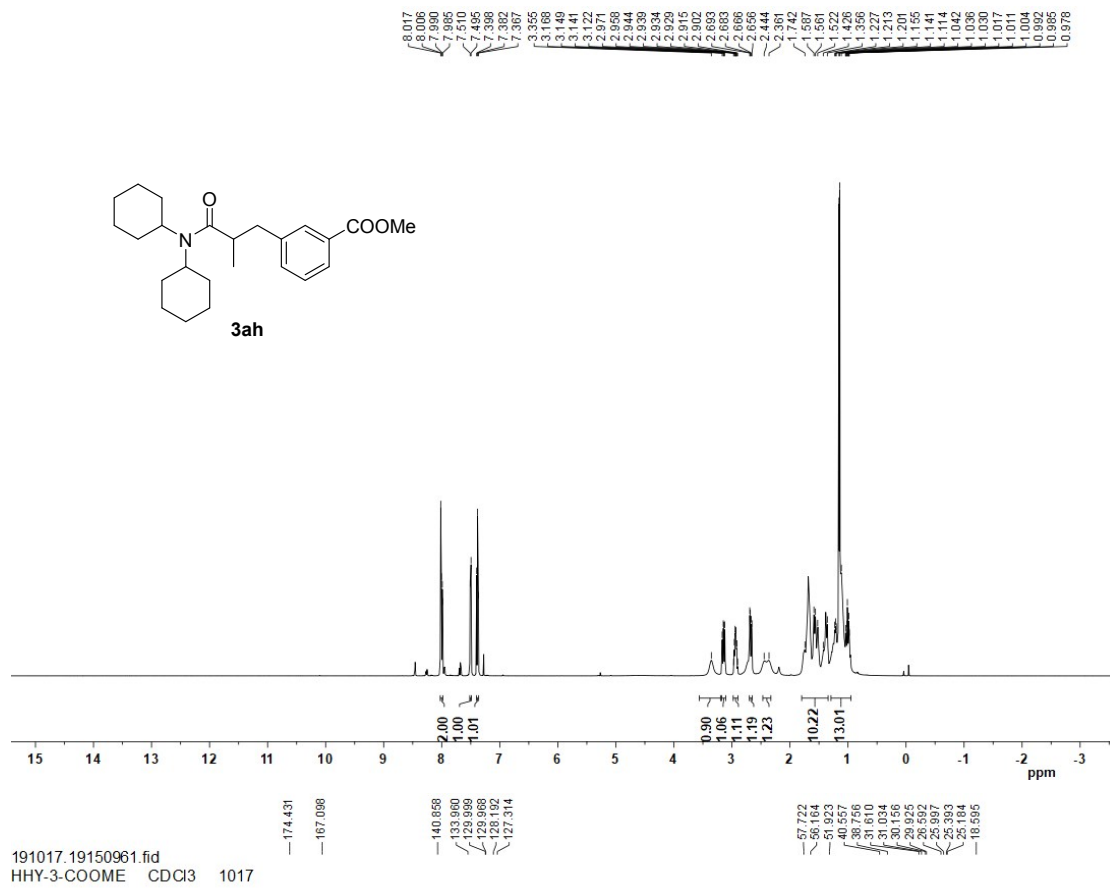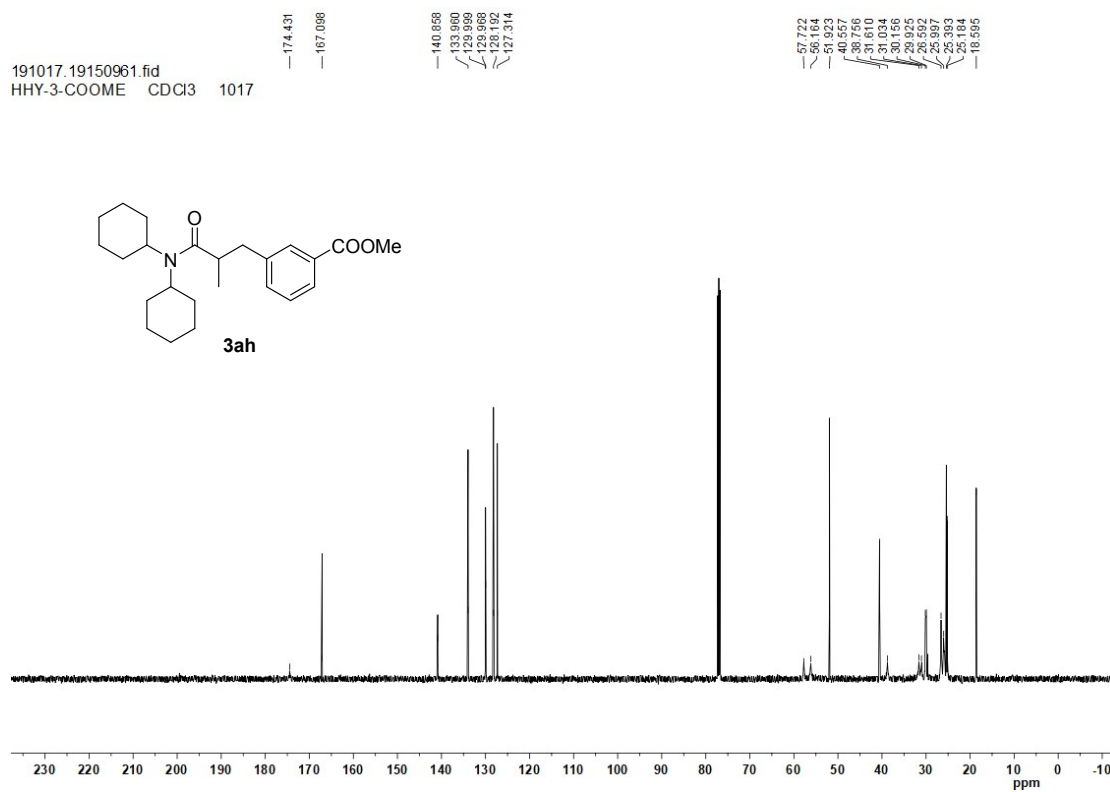

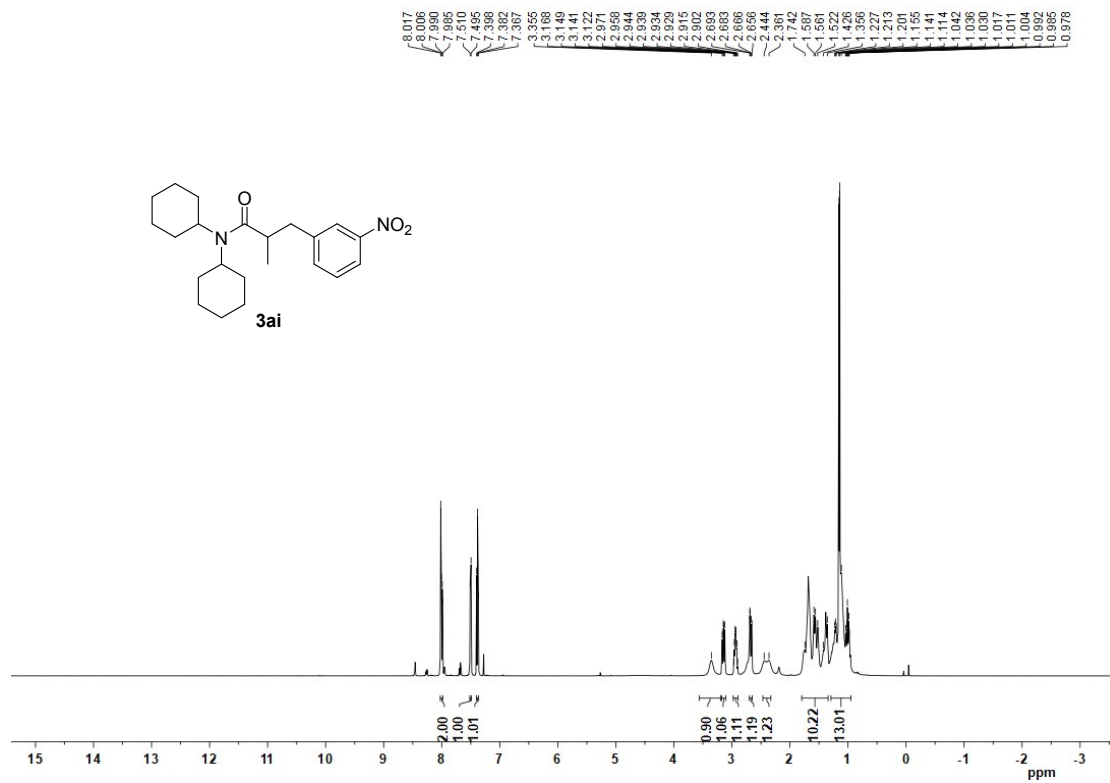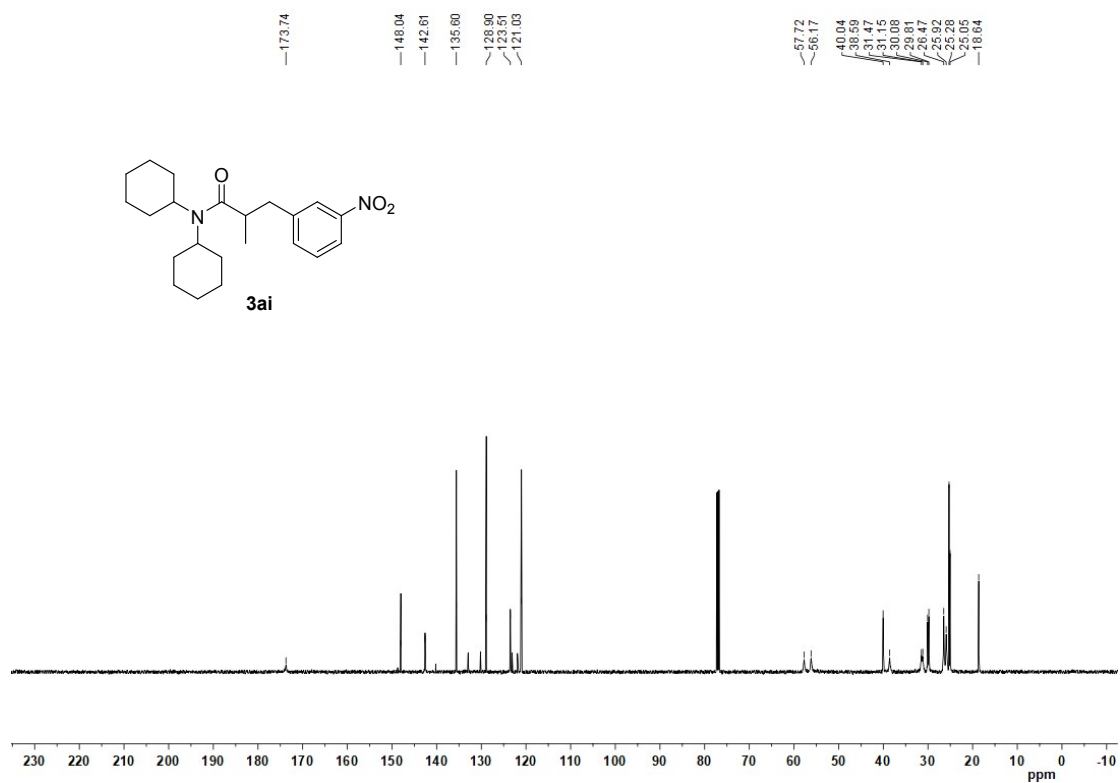



WYF-hhy-C3/1

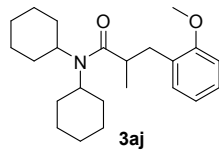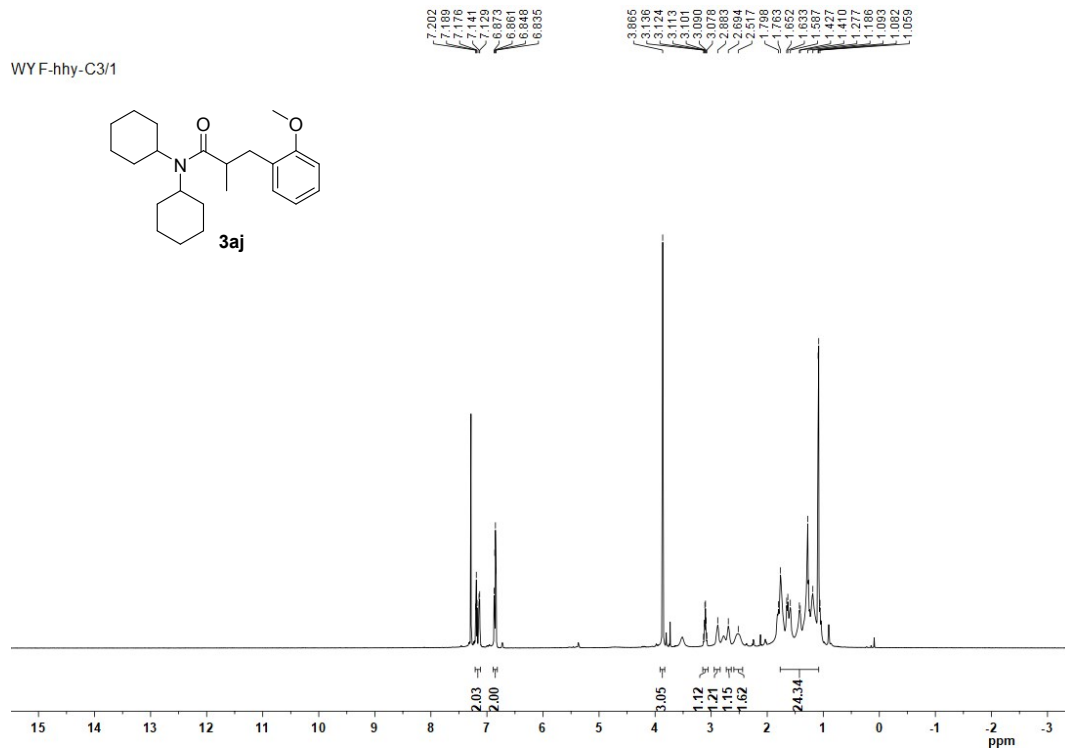

WYF-hhy-C3/2

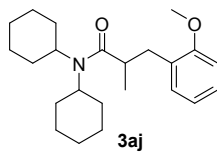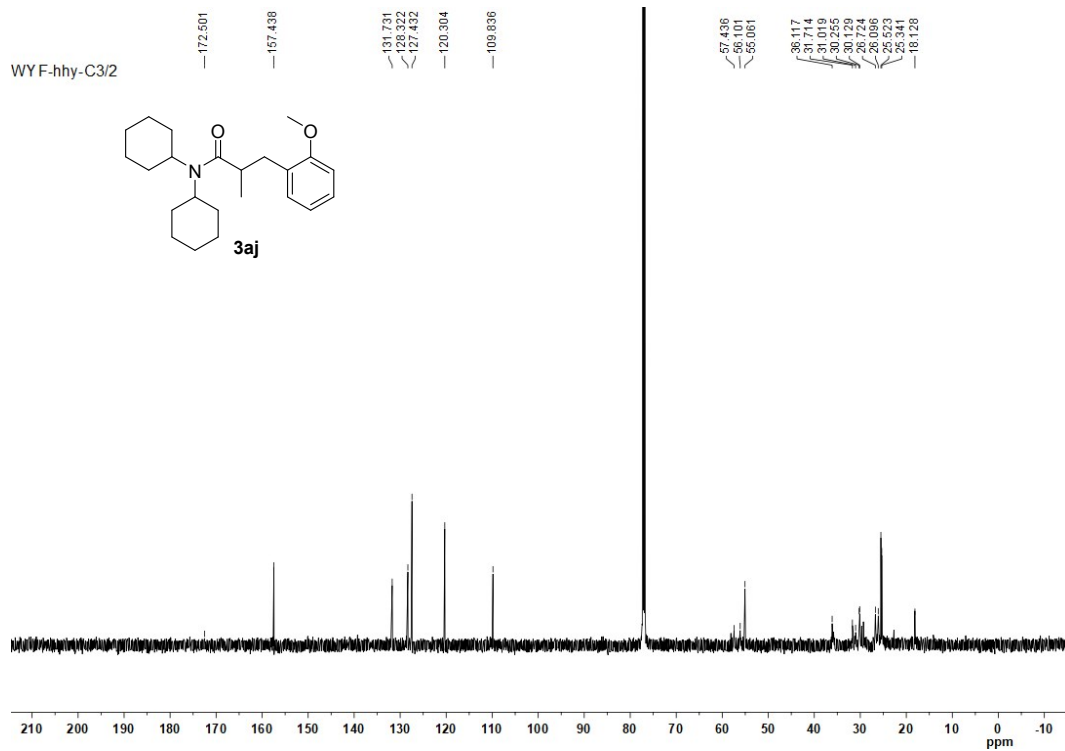

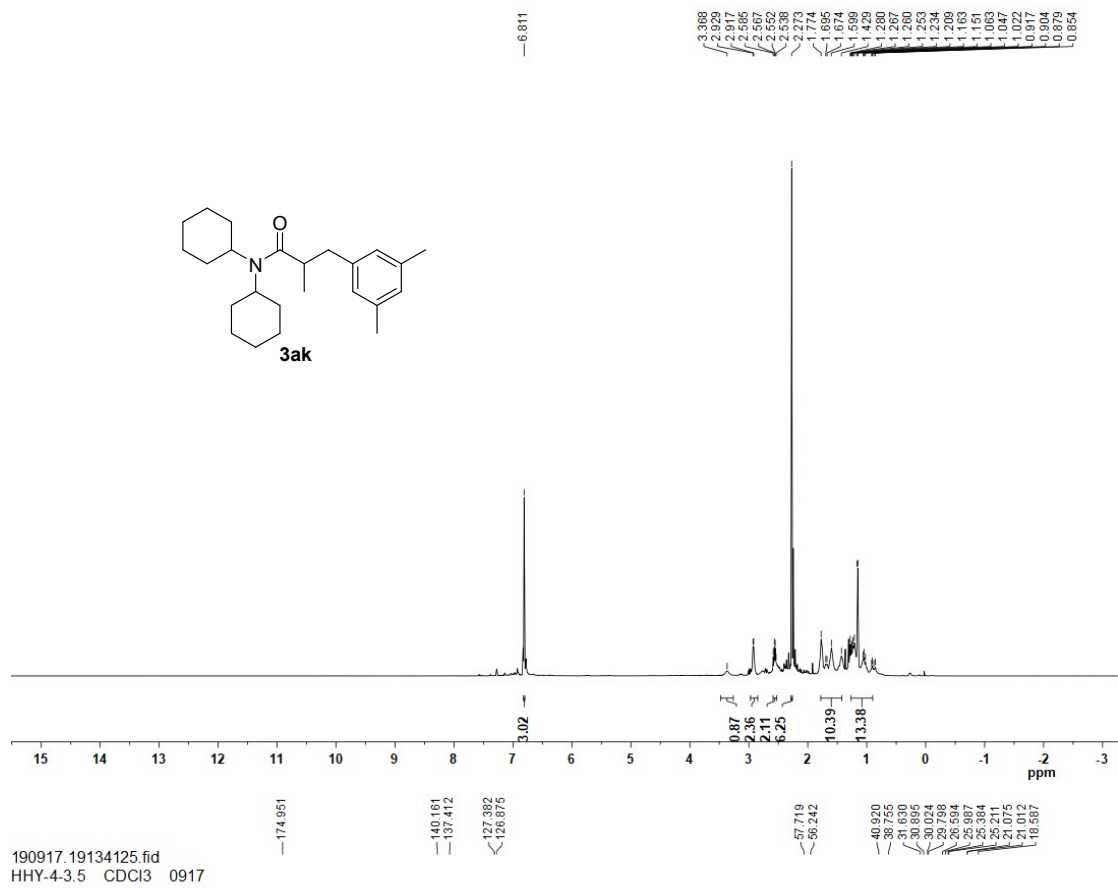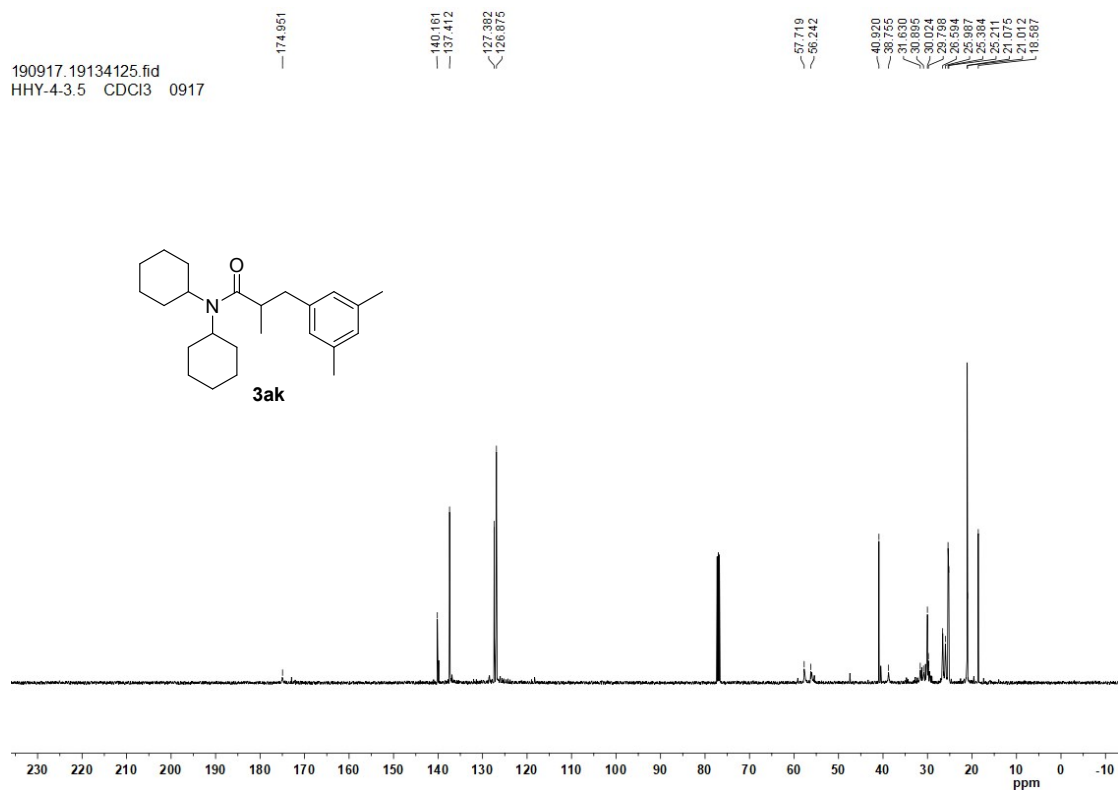

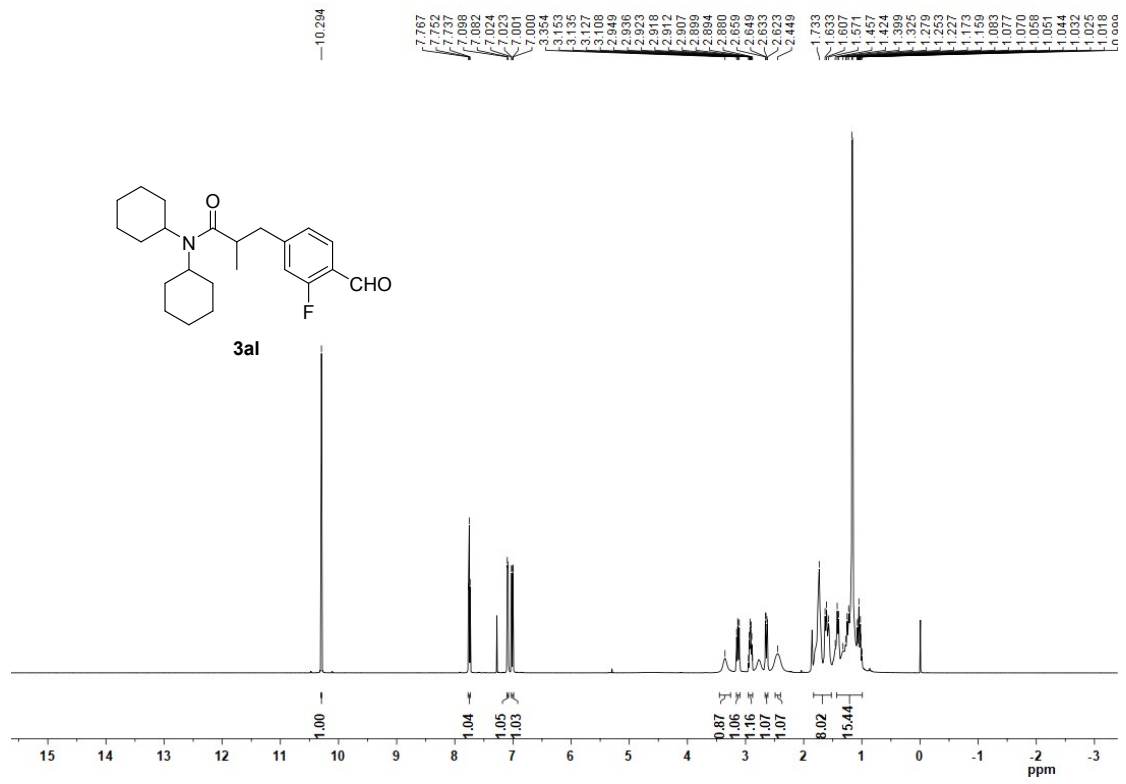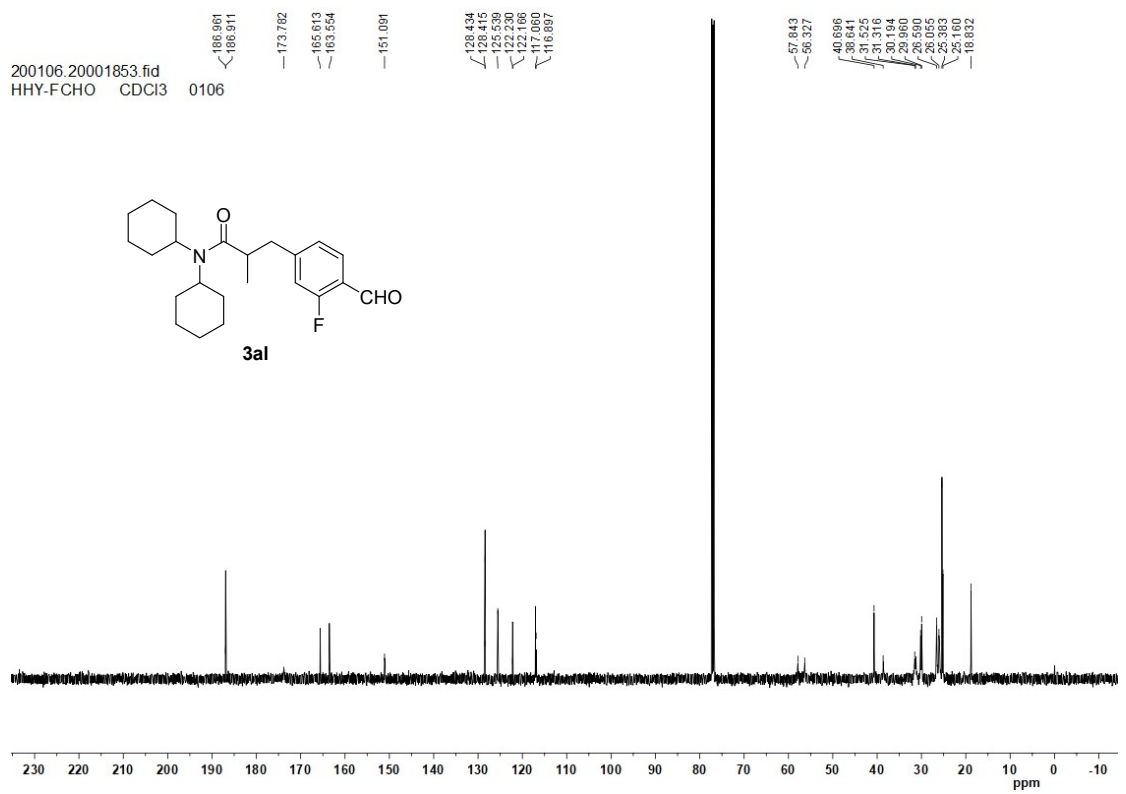

WYF-hhy-C4/1

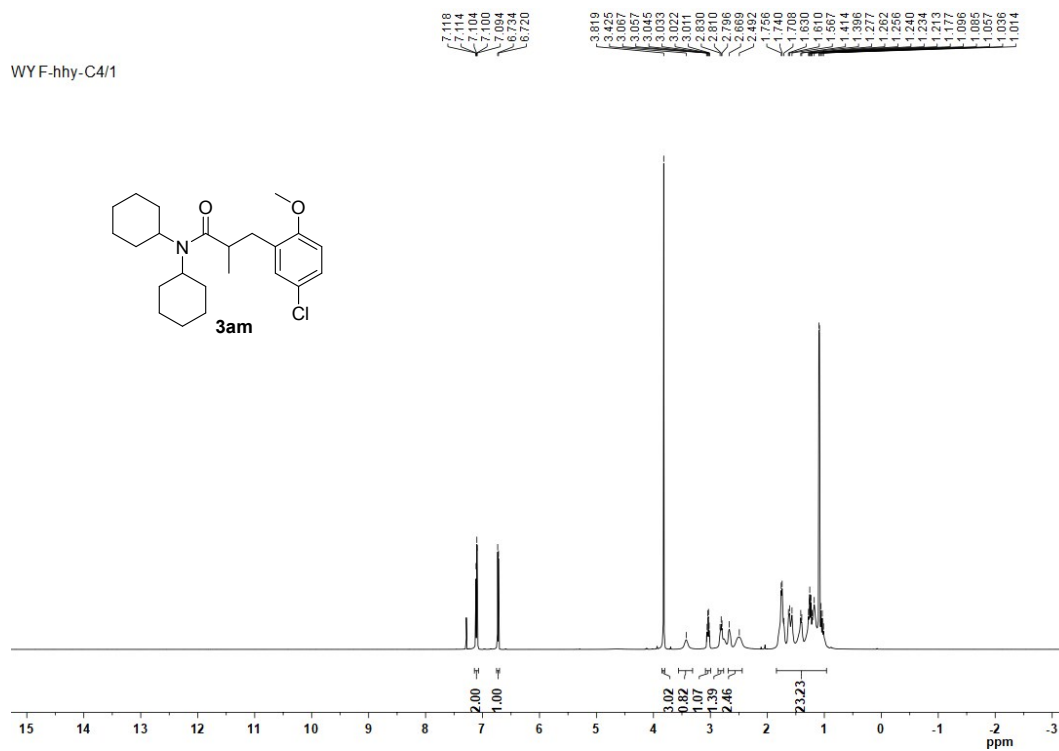

WYF-hhy-C4/2

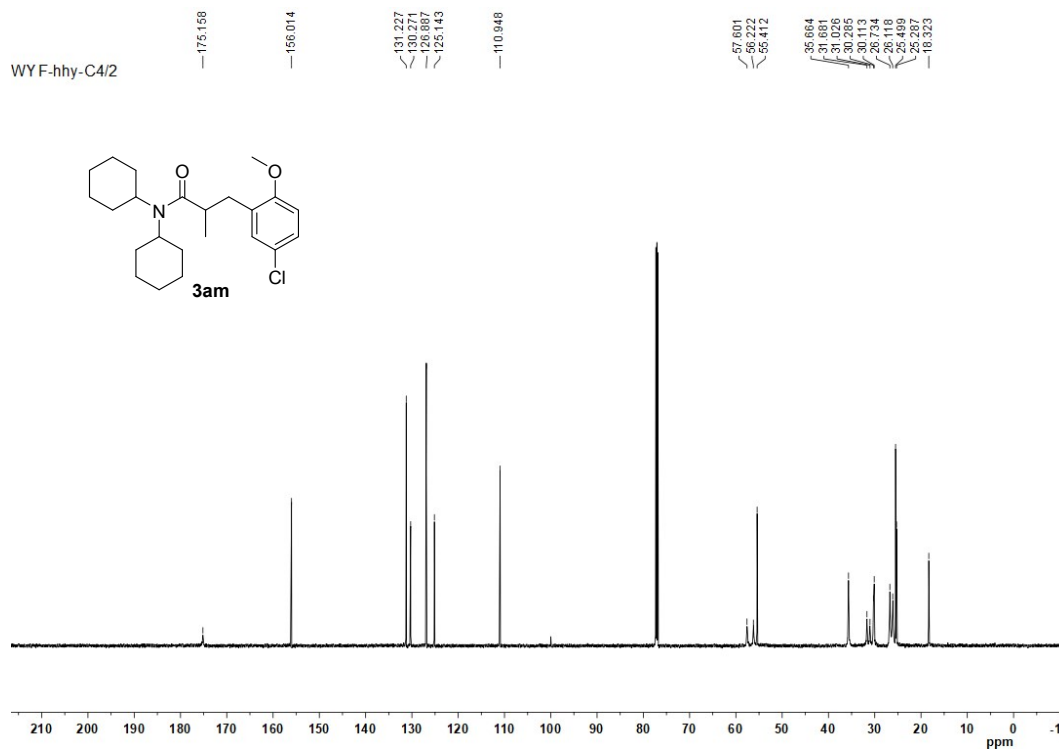

200715.20051423.fid  
HHY-B-28 CDCl3 0715

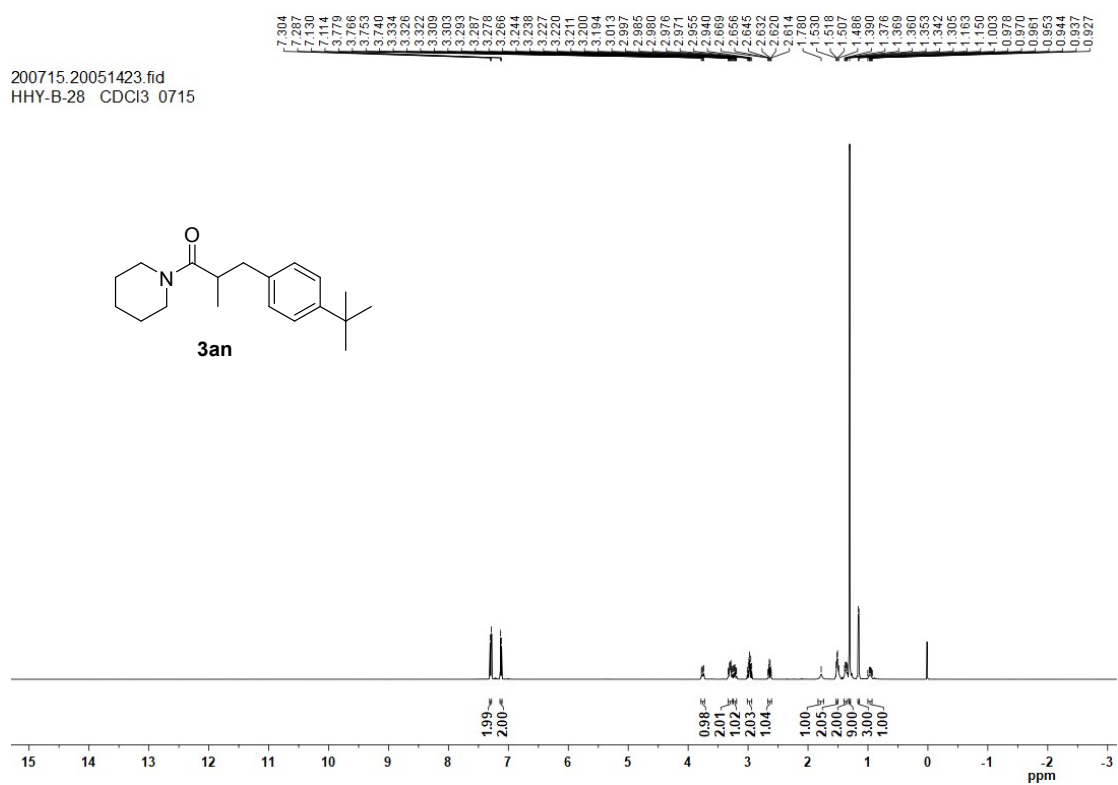

200715.20051424.fid  
HHY-B-28 CDCl3 0715

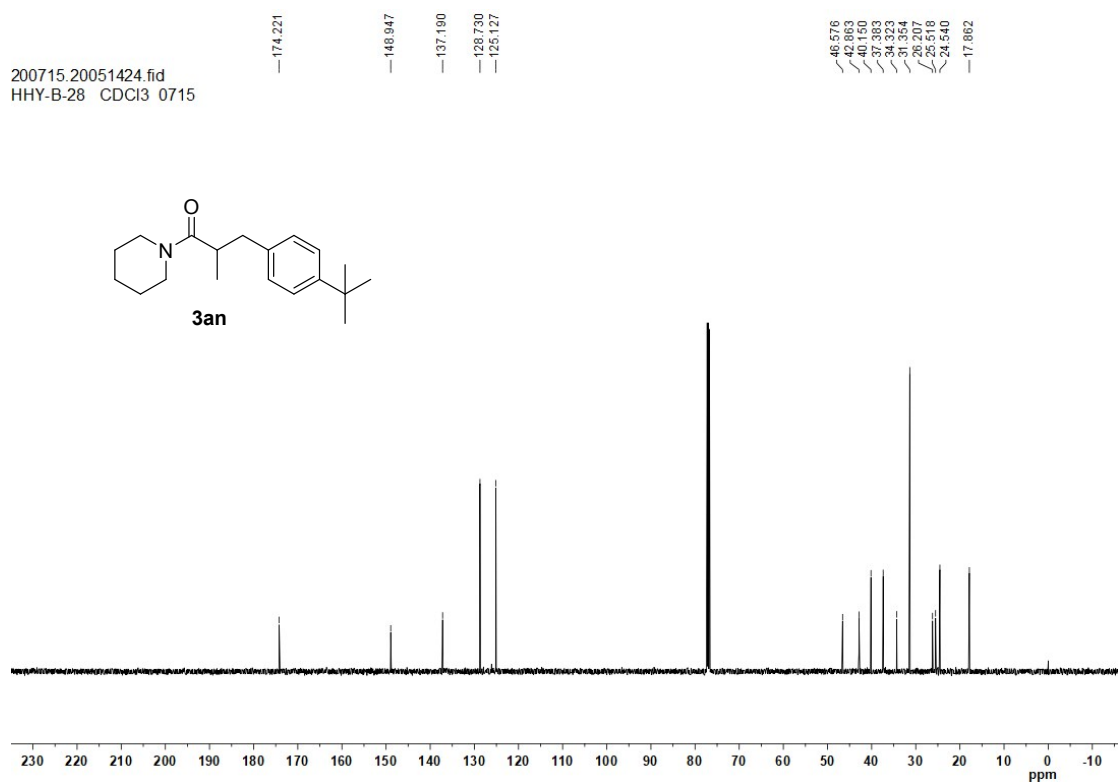

200806.20059861.fid  
HHY-B-33 CDCl3 0806

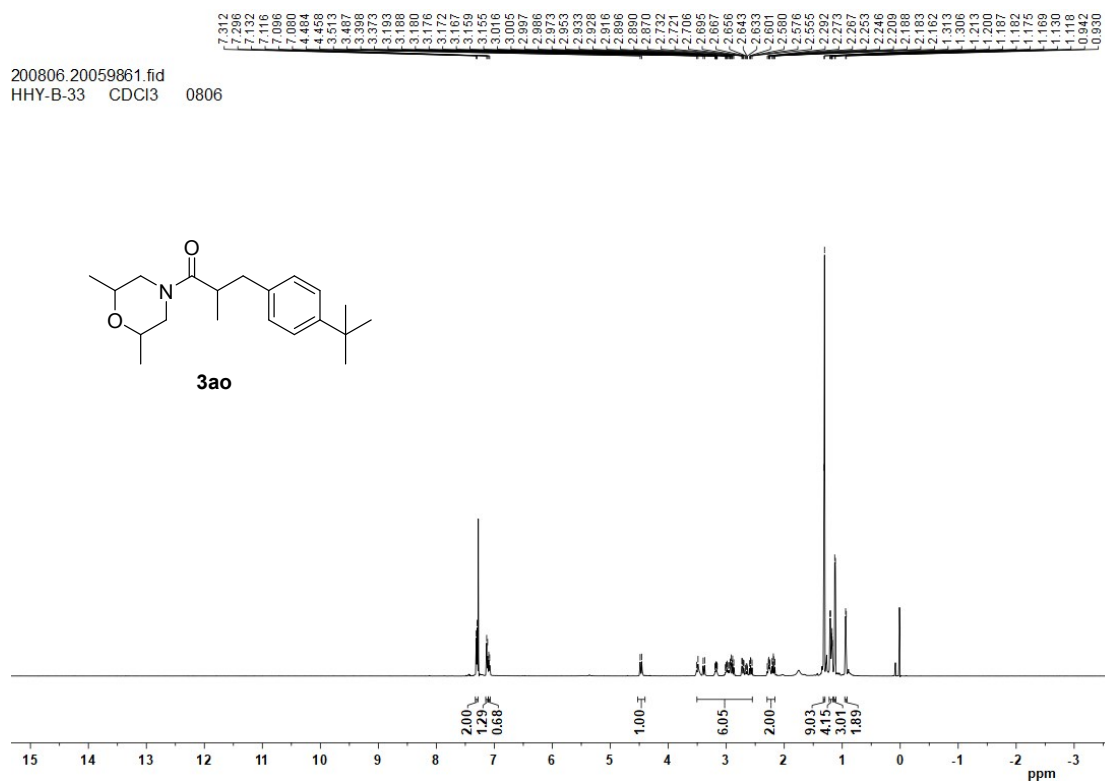

200806.20059862.fid  
HHY-B-33 CDCl3 0806

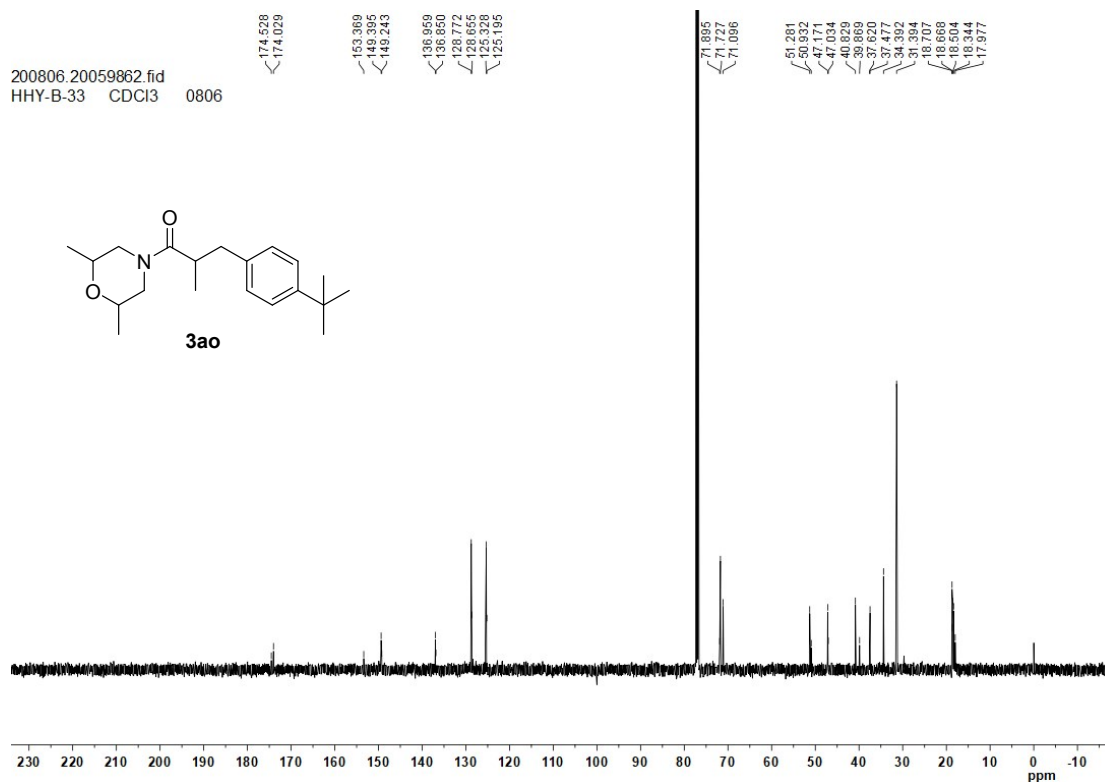

200720.20053284.fid  
HHY-H-Ph CDCl3 0720

7.520  
7.500  
7.498  
7.521  
7.482  
7.446  
7.431  
7.344  
7.325  
7.254  
7.238

3.070  
3.051  
2.518  
2.439  
2.105  
2.078  
1.771  
1.726  
1.635  
1.611  
1.576  
1.253  
1.114  
1.090  
1.066  
0.843  
0.650

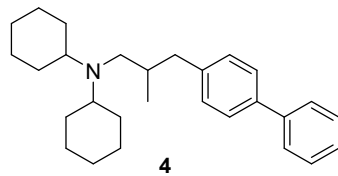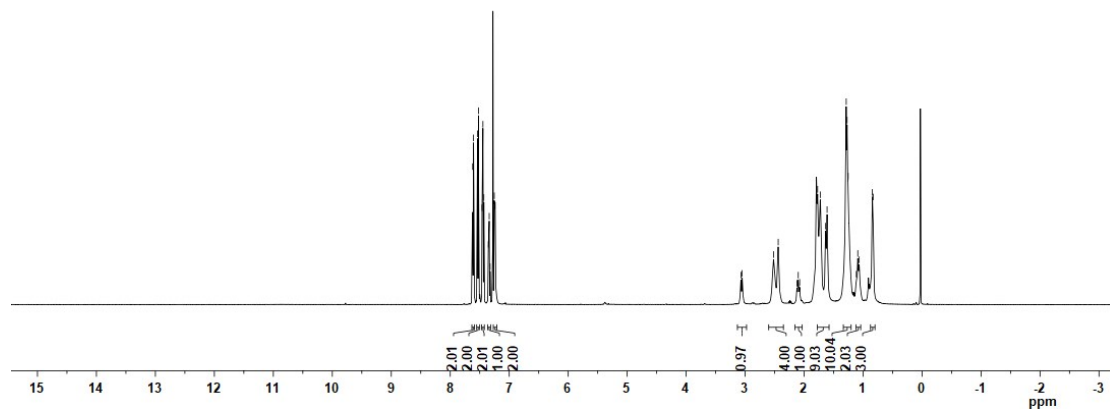

200720.20053283.fid  
HHY-H-Ph CDCl3 0720

141.735  
141.258  
138.289  
129.507  
128.885  
126.863  
126.766

58.058  
52.885  
41.105  
35.435  
32.392  
32.114  
29.696  
26.754  
26.733  
26.303  
17.806

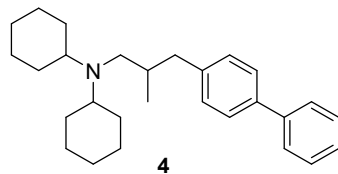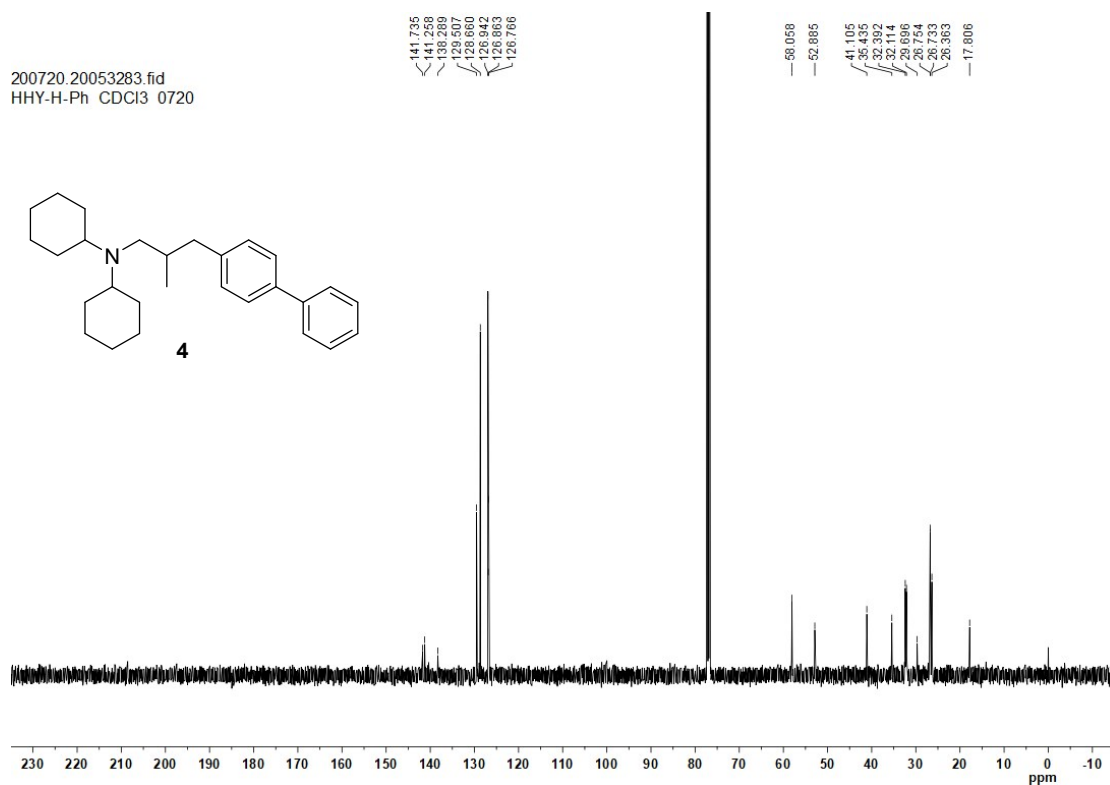

200720.20053282.fid  
HHY-H-CF3 CDCl3 0720

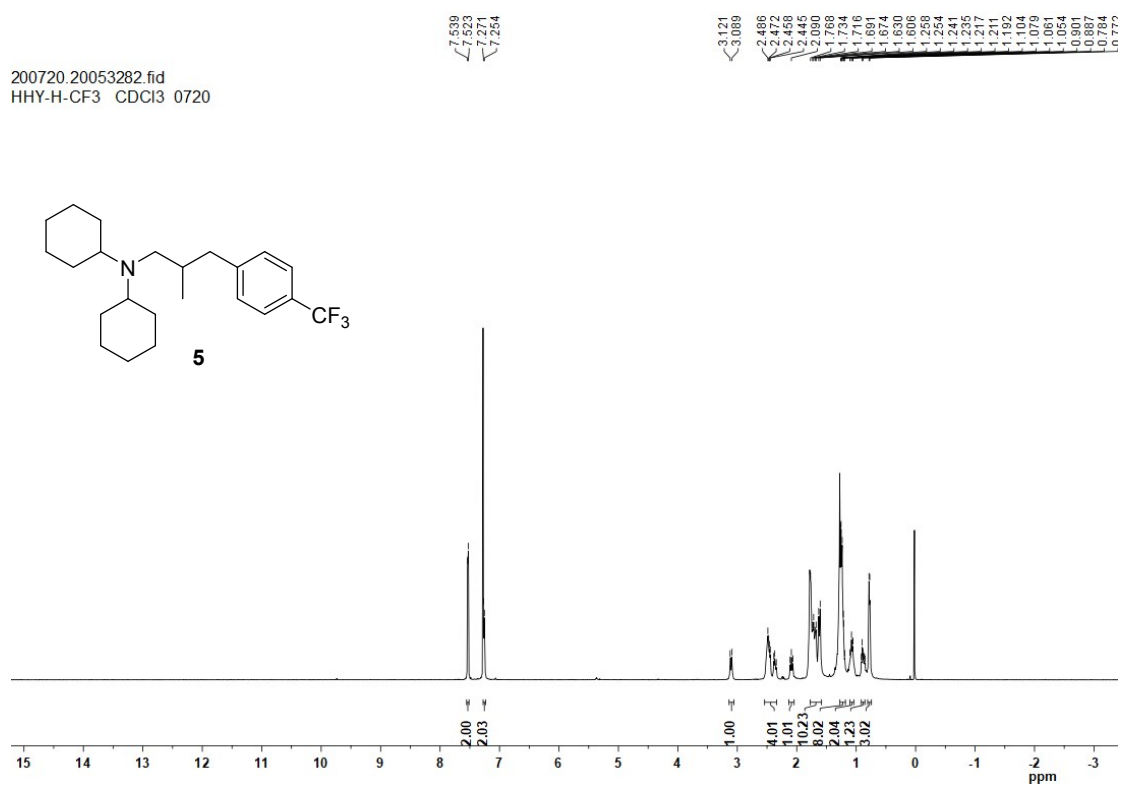

200720.20053281.fid  
HHY-H-CF3 CDCl3 0720

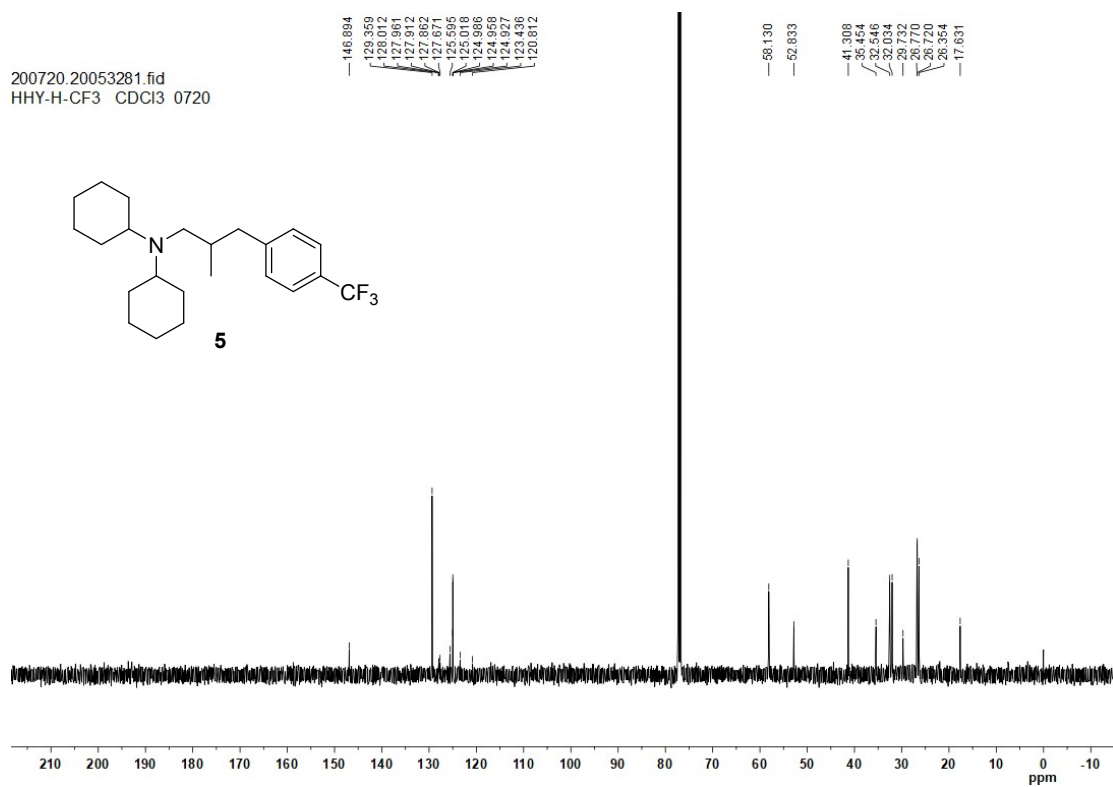



200806.20059865.fid  
HHY-B-3 CDCl3 0806

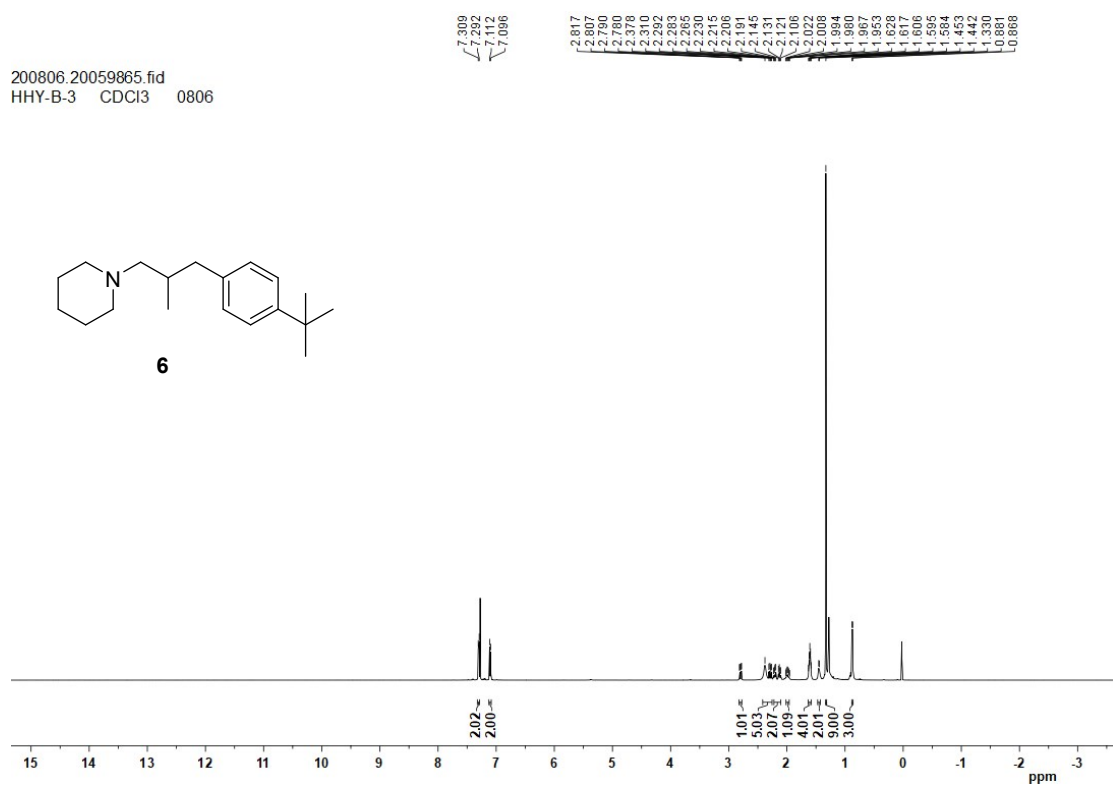

200806.20059866.fid  
HHY-B-3 CDCl3 0806

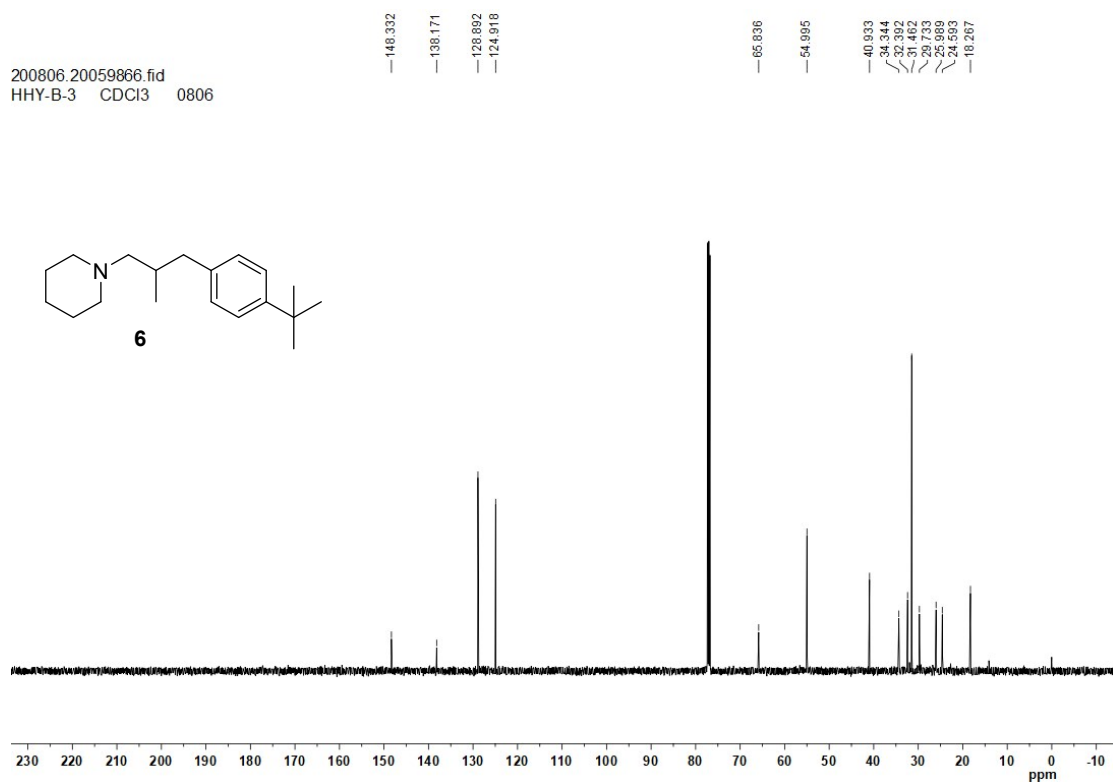

200812.20063452.fid  
HHY-H-4 CDCl3 0812

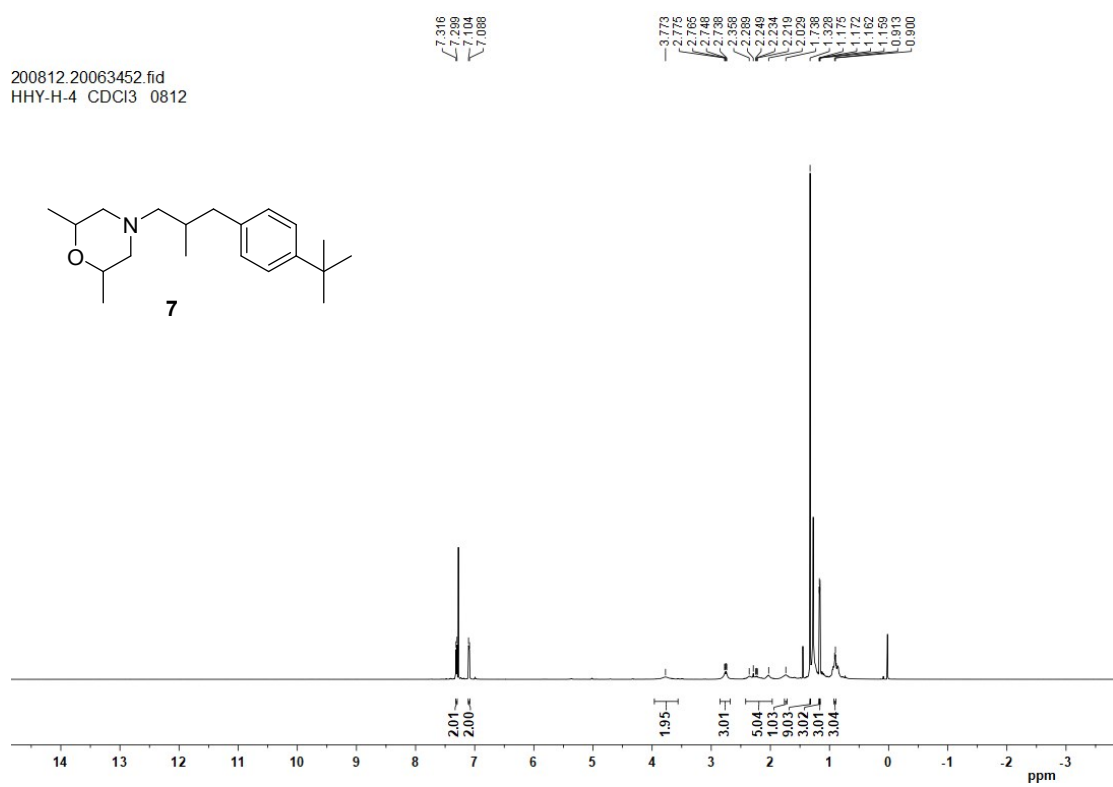

200812.20063451.fid  
HHY-H-4 CDCl3 0812

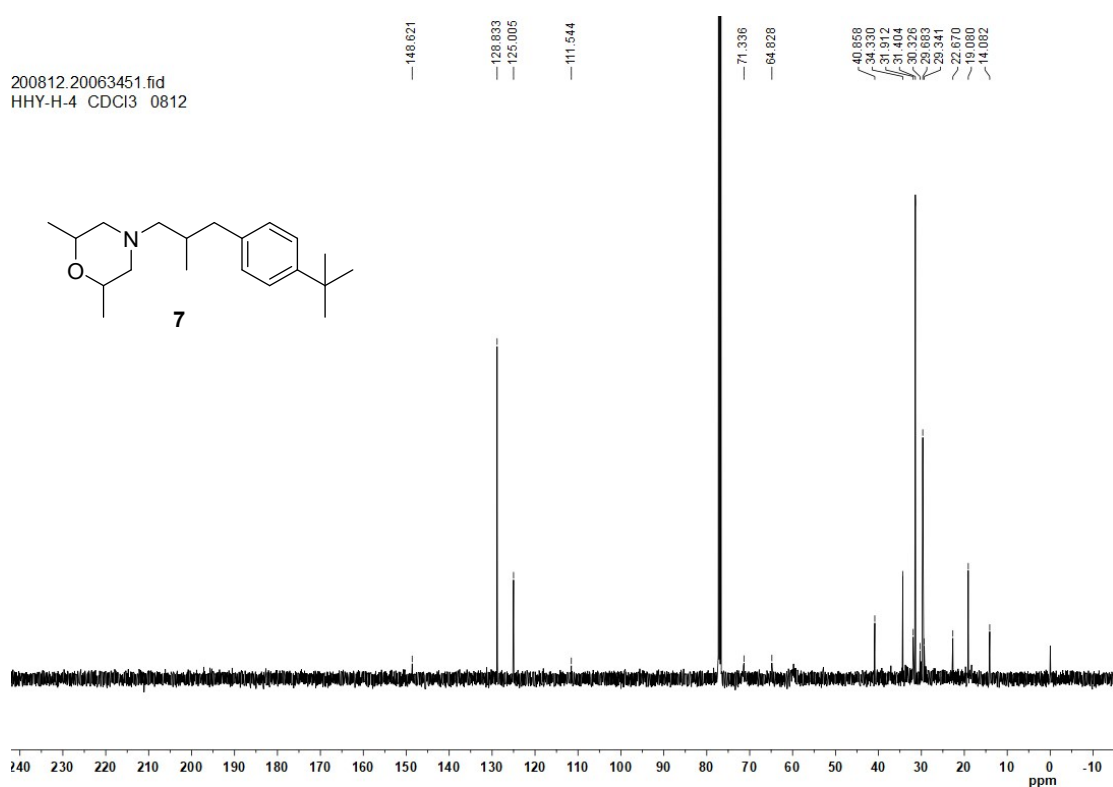

201026.20092351.fid  
HHY-XI-1 1026 CD3Cl

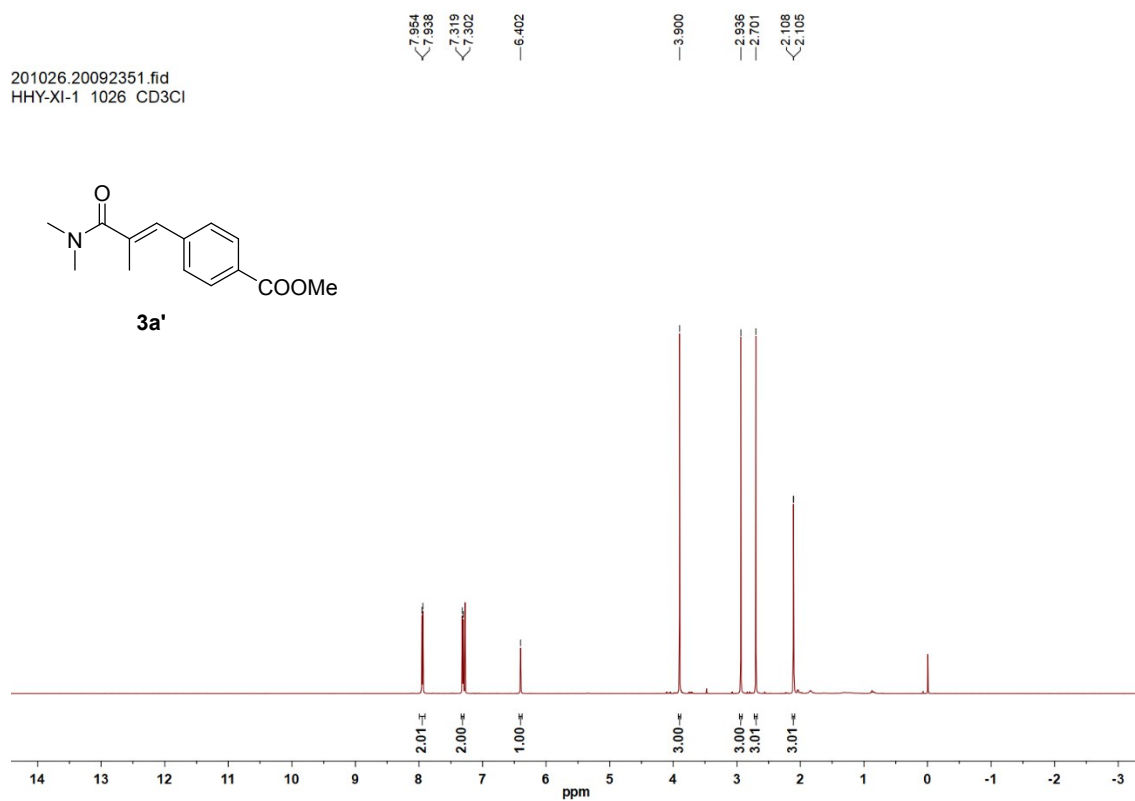

201026.20092352.fid  
HHY-XI-1 1026 CD3Cl

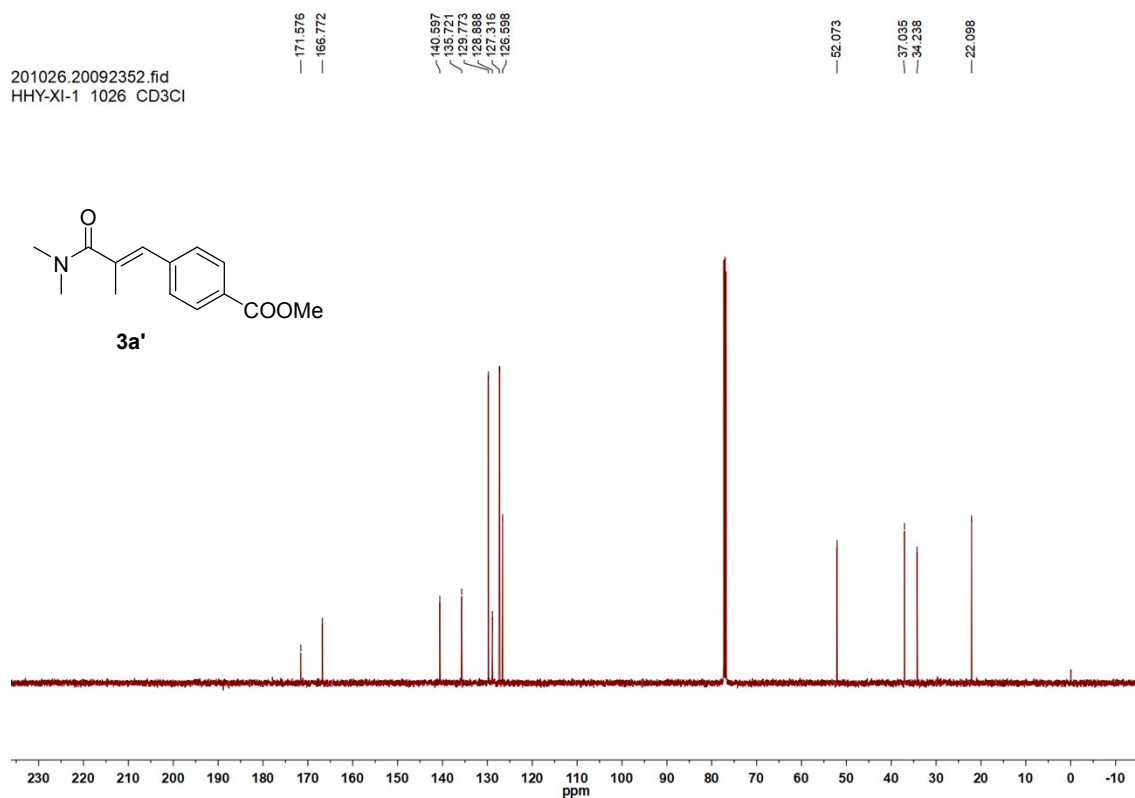

Supplement: d1cc02261j1.pdf [file d1cc02261j1.pdf]
